# Supplementary material for: ‘Organisation of delivery of care in operating suite recovery rooms within 48 hours postoperatively and patient outcomes after adult non-cardiac surgery: a systematic review’
Source: PubMed Central journal article supplement — BMJ Open. 2020 Mar 4;10(3):e027262. doi: 10.1136/bmjopen-2018-027262 (PMC7059488; doi:10.1136/bmjopen-2018-027262), 2020-03-04
Supplement: bmjopen-2018-027262.draft_revisions.pdf [file bmjopen-2018-027262.draft_revisions.pdf]

# BMJ Open

BMJ Open is committed to open peer review. As part of this commitment we make the peer review history of every article we publish publicly available.

When an article is published we post the peer reviewers' comments and the authors' responses online. We also post the versions of the paper that were used during peer review. These are the versions that the peer review comments apply to.

The versions of the paper that follow are the versions that were submitted during the peer review process. They are not the versions of record or the final published versions. They should not be cited or distributed as the published version of this manuscript.

BMJ Open is an open access journal and the full, final, typeset and author-corrected version of record of the manuscript is available on our site with no access controls, subscription charges or pay-per-view fees (<http://bmjopen.bmj.com>).

If you have any questions on BMJ Open's open peer review process please email [info.bmjopen@bmj.com](mailto:info.bmjopen@bmj.com)

# BMJ Open

**“What health service initiatives undertaken within operating suite recovery rooms have been shown to improve patient outcomes after adult non-cardiac surgery: a systematic review.”**

|                               |                                                                                                                                                                                                                                                                                                                                                |
|-------------------------------|------------------------------------------------------------------------------------------------------------------------------------------------------------------------------------------------------------------------------------------------------------------------------------------------------------------------------------------------|
| Journal:                      | <i>BMJ Open</i>                                                                                                                                                                                                                                                                                                                                |
| Manuscript ID                 | bmjopen-2018-027262                                                                                                                                                                                                                                                                                                                            |
| Article Type:                 | Research                                                                                                                                                                                                                                                                                                                                       |
| Date Submitted by the Author: | 14-Oct-2018                                                                                                                                                                                                                                                                                                                                    |
| Complete List of Authors:     | Lloyd, Courtney; University of Adelaide, Faculty of Health and Medical Sciences<br>Ludbrook, Guy; University of Adelaide,<br>Story, David; The University of Melbourne , Perioperative and Pain Medicine Unit, Melbourne Medical School<br>Maddern, Guy; University of Adelaide, Discipline of Surgery, Faculty of Health and Medical Sciences |
| Keywords:                     | Post-operative care, Post-anaesthetic care, Recovery room, Post-anaesthetic care unit (PACU)                                                                                                                                                                                                                                                   |
|                               |                                                                                                                                                                                                                                                                                                                                                |

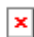

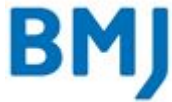

I, the Submitting Author has the right to grant and does grant on behalf of all authors of the Work (as defined in the below author licence), an exclusive licence and/or a non-exclusive licence for contributions from authors who are: i) UK Crown employees; ii) where BMJ has agreed a CC-BY licence shall apply, and/or iii) in accordance with the terms applicable for US Federal Government officers or employees acting as part of their official duties; on a worldwide, perpetual, irrevocable, royalty-free basis to BMJ Publishing Group Ltd ("BMJ") its licensees and where the relevant Journal is co-owned by BMJ to the co-owners of the Journal, to publish the Work in this journal and any other BMJ products and to exploit all rights, as set out in our [licence](#).

The Submitting Author accepts and understands that any supply made under these terms is made by BMJ to the Submitting Author unless you are acting as an employee on behalf of your employer or a postgraduate student of an affiliated institution which is paying any applicable article publishing charge ("APC") for Open Access articles. Where the Submitting Author wishes to make the Work available on an Open Access basis (and intends to pay the relevant APC), the terms of reuse of such Open Access shall be governed by a Creative Commons licence – details of these licences and which [Creative Commons](#) licence will apply to this Work are set out in our licence referred to above.

Other than as permitted in any relevant BMJ Author's Self Archiving Policies, I confirm this Work has not been accepted for publication elsewhere, is not being considered for publication elsewhere and does not duplicate material already published. I confirm all authors consent to publication of this Work and authorise the granting of this licence.

**TITLE PAGE**

“What health service initiatives undertaken within operating suite recovery rooms have been shown to improve patient outcomes after adult non-cardiac surgery: a systematic review.”

**Corresponding Author:**

Dr Courtney Lloyd MBBS  
Masters of Clinical Sciences Candidate  
University of Adelaide  
Faculty of Health and Medical Sciences  
AHMS Floor 8  
North Terrace  
Adelaide, South Australia 5000  
Email: courtney.lloyd@adelaide.edu.au  
Phone: +61 417 876 536

**Other Authors:**

Professor Guy Ludbrook PhD, MBBS, FANZCA  
Professor of Anaesthesia  
University of Adelaide  
Faculty of Health and Medical Sciences  
AHMS Floor 8  
North Terrace  
Adelaide, South Australia 5000  
Email: guy.ludbrook@adelaide.edu.au

Professor David Story MBBS, MD, BMedSci, FANZCA  
Chair of Anaesthesia  
Deputy Director, Centre for Integrated Critical Care  
Head of MCATS  
The University of Melbourne  
Parkville, Victoria 3010  
Email: dastory@unimelb.edu.au

Professor Guy J. Maddern PhD, MS, MD, FRACS, FAHMS  
RP Jepson Professor of Surgery  
University of Adelaide Discipline of Surgery  
Faculty of Health and Medical Sciences  
Clinical Director Surgical Services, Central Adelaide Local Health Network  
The Queen Elizabeth Hospital  
Woodville, South Australia 5011  
Email: guy.maddern@adelaide.edu.au

1  
2  
3 **Word Count:** 2603  
4  
5  
6  
7

8 **ABSTRACT**

9 **Context:** Post-operative recovery rooms have existed since 1847, and the concept of Overnight Intensive  
10 Recovery has been successful since the 1990s. However, there is sparse literature investigating the  
11 interventions undertaken in recovery, and their impact on patients after recovery room discharge.  
12  
13

14  
15  
16 **Objective:** This review aimed to investigate any health service initiatives undertaken in post-operative  
17 recovery room up to 48 hours post-operatively; and their effect on patient outcomes; including mortality,  
18 morbidity, return to theatre, unplanned intensive care unit (ICU) admission and length of hospital stay.  
19  
20

21  
22  
23 **Data sources:** NCBI PubMed, EMBASE and CINAHL.  
24  
25

26 **Study selection:** Studies published from 1990 onwards, investigating health service initiatives undertaken  
27 in the post-operative recovery room, and their impact on patient outcomes. One author screened titles  
28 and abstracts, with two authors completing full text reviews to determine inclusion based on pre-  
29 determined criteria. A total of 3288 unique studies were identified, with 14 selected for full text reviews,  
30 and 8 included in the review.  
31  
32  
33

34  
35  
36 **Data extraction:** End Note 8 (Clarivate Analytics, Boston, USA) was used to manage references and  
37 exclude duplicates. One author extracted data from each study using a data extraction form adapted from  
38 the Cochrane Data Extraction Template, with all data checked by a second author.  
39  
40  
41

42  
43 **Data synthesis:** Narrative synthesis of data was the primary outcome measure, with all data of individual  
44 studies also presented in the summary results table.  
45  
46  
47

48 **Conclusions:** Managing selected post-operative patients in a Recovery Room, or PACU, instead of ICU,  
49 does not appear to be associated with worse patient outcomes, however due to the high risk of bias within  
50 studies, the strength of evidence is moderate at best. Four of eight studies also examined hospital length  
51 of stay, and two found the intervention was associated with decreased length of stay and two found no  
52 association.  
53  
54  
55  
56  
57  
58  
59  
60

1  
2  
3  
4  
5 Key words: Post-operative care, post-anaesthetic care, recovery room, post-anaesthetic care unit (PACU)

## 6 7 **STRENGTHS AND LIMITATIONS OF THIS STUDY**

- 8 • This is the first systematic review to provide a summary of health service interventions in recovery  
9 and their impact on patient outcomes. It is a current area of interest for many hospitals/health  
10 networks, due to the frequency and cost of post-operative complications.
- 11 • The PRISMA statement was strictly adhered to, with a broad search strategy in an attempt to  
12 capture all relevant publications.
- 13 • The variation in study designs and primary outcome measures meant that we were unable to  
14 combine data for aggregate analysis or meta-analysis.
- 15 • Narrative synthesis of key results may introduce bias; however, steps were taken to minimise this,  
16 including the review of all data by a second author.

## 23 24 25 **INTRODUCTION**

### 26 27 **Rationale**

28 The concept of a post-operative recovery room, or post anaesthesia care unit (PACU), was first described  
29 in 1847[1], and the progression of surgical and anaesthetic techniques has seen marked advances in their  
30 form and function. However, there is a striking paucity of literature investigating the interventions  
31 undertaken in recovery, and their impact on patients after recovery room discharge. An editorial by C. Aps  
32 in 2004, discussed the concept of Overnight Intensive Recovery; where patients can be managed in the  
33 PACU for up to 24 hours[1], to avoid unnecessary intensive care unit (ICU) admissions and decrease  
34 cancellations due to lack of bed availability. This concept was introduced in the 1990s at St Thomas'  
35 Hospital, London[1]; and despite its apparent success, has not spawned further research surrounding such  
36 a model of care. Swart et al retrospectively examined the impact of the loss of access to a high dependency  
37 unit (HDU) for post-operative management of medium risk patients, and showed a significant increase in  
38 emergency laparotomies and unplanned critical care admissions[2]. However, the use of HDU for post-  
39 operative patients has also been associated with an increase in post-operative respiratory  
40 complications[3]. The concept of extended 6-hour recovery followed by a monitored ward bed, instead of  
41 an elective ICU admission post-operatively, has also shown to be safe, with no worsening in patient  
42 outcomes[4]. This is the first systematic review to provide a summary of all health service interventions  
43 provided in recovery, and their impact on patient outcomes after recovery room discharge. In presenting  
44  
45  
46  
47  
48  
49  
50  
51  
52  
53  
54  
55  
56  
57  
58  
59  
60

1  
2  
3 these finding, we hope to highlight the need for further research to help improve the care of patients in  
4 the post-operative period.  
5  
6  
7

## 8 **Objectives**

9  
10 The objective of this systematic review was to investigate any health service initiatives undertaken in  
11 operating suite recovery rooms, in the post-operative period, that have been shown to improve outcomes  
12 after PACU discharge, for adult, non-cardiac surgical patients. Important outcomes included mortality,  
13 morbidity, return to theatre, unplanned ICU admission and length of hospital stay. Prospective and  
14 retrospective randomised control trials, cohort studies, case control studies and comparison studies were  
15 included for analysis.  
16  
17  
18  
19  
20

## 21 **METHODS**

### 22 **Protocol and registration**

23  
24 A review protocol was developed in line with the Preferred Reporting of Observational Studies and  
25 Meta-Analysis (PRISMA) statement by the author team prior to commencing the systematic review. This  
26 protocol is registered on the International Prospective Register of Systematic Reviews (PROSPERO)  
27 database, registration number CRD42018106093.  
28  
29  
30  
31  
32

### 33 **Eligibility criteria**

34  
35 Included studies investigated health service initiatives in the PACU, in the post-operative period, up to 48  
36 hours post-operatively. Adult patient groups were the primary focus, however, studies that included a  
37 small cohort of children were not automatically excluded. Studies that explored the relationship between  
38 interventions in recovery and mortality, morbidity, hospital length of stay, unplanned ICU admission and  
39 return to theatre were included. Varying study designs were eligible for inclusion; such as randomised  
40 control trials, cohort studies, case control studies and before and after studies. Cross-sectional studies  
41 and case reports were excluded. Only studies published from 1990 onwards were included, to focus on  
42 up to date clinical practice, and minimise the inclusion of irrelevant data. Studies published in a language  
43 other than English, grey literature and studies focussing solely on ambulatory surgery were excluded.  
44  
45  
46  
47  
48  
49  
50

### 51 **Information sources and search strategy**

52  
53 Medical Subject Headings (MeSH) terms were generated from the NCBI PubMed advanced search area  
54 with the assistance of the University of Adelaide Health Sciences librarian. Logic grids were used as a tool,  
55  
56  
57  
58  
59

1  
2  
3 to replicate the search throughout the three databases. The full electronic search strategy for the PubMed  
4 database is presented in Appendix 1. This search strategy was utilized from 23/3/18 to 8/4/18 to yield the  
5 articles screened for inclusion in the review.  
6  
7  
8  
9

### 10 **Study selection**

11 Search results from each data base were recorded, and imported into EndNote 8 (Clarivate Analytics,  
12 Boston, USA). Key word searching was also performed to identify new studies that had not yet been  
13 assigned indexing terms for the databases. Reference lists from key articles were also reviewed to identify  
14 further papers that may have been relevant to the review. Titles and abstracts were screened by one  
15 reviewer (CL), who was not blinded to journal titles or to the study authors or institutions. Articles selected  
16 for full text review were reviewed by two reviewers (CL and GL), and any discrepancies arising regarding  
17 the relevance of a study were resolved by consulting a third party. The list of references for inclusion was  
18 sent to all authors to ensure consensus.  
19  
20  
21  
22  
23  
24  
25  
26

### 27 **Data collection process**

28 The Cochrane Data Extraction Template for Included Studies from their consumers and communication  
29 page, was used as a base for our data extraction form. This form was piloted on two initial studies for  
30 usability, with no further modifications required. One reviewer extracted the initial data from each study  
31 (CL), and this data was confirmed by a second reviewer (GL) before inclusion in the review. One study only  
32 included data in pictorial form, and an attempt was made to contact the authors to obtain the raw data.  
33 Unfortunately, this was unsuccessful.  
34  
35  
36  
37  
38  
39

### 40 **Data items**

41 Data items extracted from each study included patient population and characteristics, intervention aims  
42 and methods, comparison groups and outcome measures. These data items are presented in the  
43 Characteristics of Included Studies Tables.  
44  
45  
46  
47

### 48 **Risk of bias in individual studies**

49 Risk of bias in individual studies was assessed by two reviewers (CL and GL) using Gate-Lite and Robins-I  
50 (previously known as A Cochrane Risk of Bias Assessment Tool: for Non-Randomized Studies of  
51 Interventions (ACROBAT-NRSI)). Narrative synthesis of data placed more weight on higher quality studies,  
52  
53  
54  
55  
56  
57  
58  
59



1  
2  
3 however, all studies and their results are presented, with caveats to highlight the individual biases that  
4 will affect interpretations of results.  
5  
6  
7

### 8 **Summary measures and planned methods of analysis**

9  
10 Narrative synthesis of data was the principle summary measure. This was due to the differing study  
11 designs and variable outcome measures in each study. Meta-analysis was not appropriate for the data in  
12 this systematic review. All data is presented individually, in relation to each study, with further narrative  
13 synthesis to summarise results. Results from studies were unable to be combined due to the variation in  
14 primary and secondary outcome measures, and differences in study design. No additional analysis or  
15 subgroup analysis was performed during this systematic review.  
16  
17  
18  
19  
20

### 21 **Risk of bias across studies**

22  
23 Risk of bias across studies was assessed by two reviewers (CL and GL), using the Cochrane Risk of Bias  
24 Tool, and discussing any evident publication bias or selective reporting.  
25  
26  
27

## 28 **RESULTS**

### 29 **Study selection**

30  
31 Database results, and numbers of studies screened are presented in the flow diagram (Figure 1). All  
32 references were imported into EndNote 8 (Clarivate Analytics, Boston, USA) for title and abstract  
33 screening. One reviewer (CL) screened all titles and abstracts, with ambiguous studies included for full  
34 text review. 14 studies were selected for full text review. Full text reviews were completed by two  
35 reviewers (CL and GL), and 8 studies were selected for inclusion in the review. A summary of included  
36 and excluded studies was sent to the third and fourth authors for consensus.  
37  
38  
39  
40  
41  
42  
43

### 44 **Figure 1. Search Results**

45  
46  
47  
48  
49  
50  
51  
52  
53  
54  
55  
56  
57  
58  
59  
60

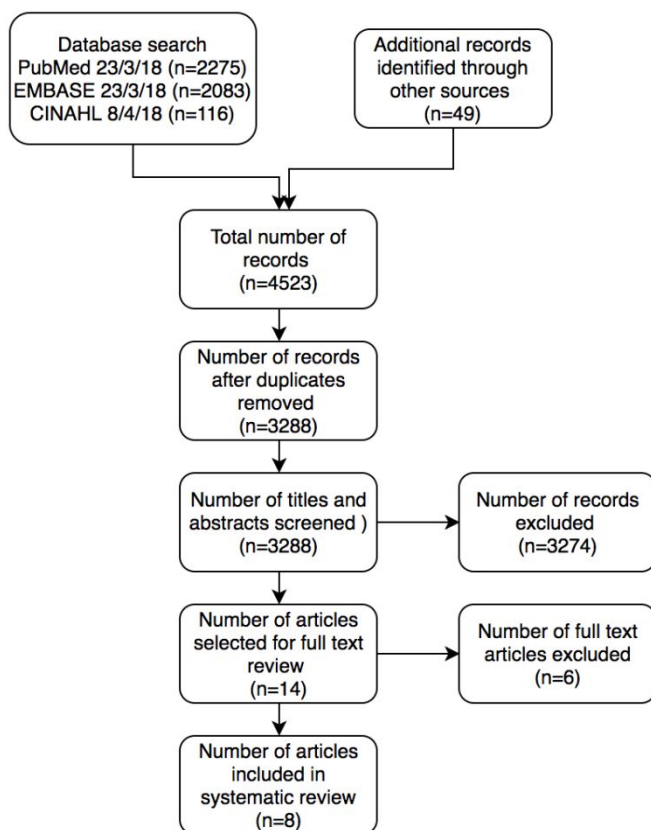

### Study characteristics

Of the eight studies included, four of the included studies were retrospective cohort studies[5-8], two were observational cohort studies[9, 10], one was a prospective non-randomised pre-post intervention study[11], and one was a prospective randomised cohort study[12]. Study characteristics for each of the included studies are outlined in the Characteristics of Included Studies Summary Table (Table 1). Four studies investigated the use of PACU as a non-ICU pathway for post-operative patients[5, 7, 9, 10]. Two investigated the implementation of physiotherapy in PACU, and the impact on patient outcomes[8, 12]. One evaluated the use of a new nursing scoring tool, and its impact on recognition of patient deterioration in PACU[11], and one evaluated the implementation of a two-track clinical pathway in PACU, and the effect on patient outcomes[6]. All studies focussed primarily on adults, but one included small cohort of children[7]. Common outcome measures included in-hospital mortality, PACU length of stay and hospital length of stay. Further details regarding patient population characteristics, study methodology and outcome measures are also outlined in the supplementary tables published online.

**Table 1.** *Characteristics of Included Studies Summary Table*

1  
2  
3  
4  
5  
6  
7  
8  
9  
10  
11  
12  
13  
14  
15  
16  
17  
18  
19  
20  
21  
22  
23  
24  
25  
26  
27  
28  
29  
30  
31  
32  
33  
34  
35  
36  
37  
38  
39  
40  
41  
42  
43  
44  
45  
46  
47  
48  
49  
50  
51  
52  
53  
54  
55  
56  
57  
58  
59  
60

| <b>Source</b>                    | <b>Aim</b>                                                                                                                                                                        | <b>Study Design</b>                                             | <b>Number of arms/groups</b>                                                                                                                                                                                                         | <b>Population</b>                                                                                                                     | <b>Intervention</b>                                                                                                | <b>Comparison group</b>                                    | <b>Outcome measures</b>                                                                               |
|----------------------------------|-----------------------------------------------------------------------------------------------------------------------------------------------------------------------------------|-----------------------------------------------------------------|--------------------------------------------------------------------------------------------------------------------------------------------------------------------------------------------------------------------------------------|---------------------------------------------------------------------------------------------------------------------------------------|--------------------------------------------------------------------------------------------------------------------|------------------------------------------------------------|-------------------------------------------------------------------------------------------------------|
| Callaghan, Lynch et al. 2005     | To determine the safety of introducing non-ICU pathways for selected patients. And evaluate the effect on cost, ICU beds availability and cancellation rates of elective surgery. | Retrospective cohort study.                                     | Intervention group: patients selected for overnight intensive recovery. Comparison group: patients booked for an elective ICU admission.                                                                                             | All patients undergoing elective open aortic surgery between 1/01/98 and 31/12/02.                                                    | Introduction of OIR (Overnight Intensive Recovery)                                                                 | Elective post-operative ICU bed                            | In hospital mortality<br>In hospital morbidity<br>Post-operative length of stay<br>ICU length of stay |
| Eichenberger, Haller et al. 2011 | To assess the impact of a clinical pathway implemented in a post-anaesthesia care unit on post-operative outcomes.                                                                | Retrospective cohort study based on electronic patient records. | Fast track: nurse driven, ASA 1-2. Slow track: physician driven, ASA 3-5 who have undergone minor or major surgery, or developed post-op complications. Comparison group: Pre-existing PACU conditions without the clinical pathway. | All elective and non-elective inpatients, who underwent a surgical or endoscopic procedure under anaesthesia during the study period. | Introduction of a two-track clinical pathway that clearly defined & coordinated medical and nursing interventions. | Pre-existing PACU conditions without the clinical pathway. | PACU length of stay<br>In-hospital mortality<br>Unplanned ICU admissions after PACU stay.             |
| Fraser and Nair 2016             | To assess if elective surgical patients were stable enough to return to the general ward after a stay in Extended Recovery instead of being routinely admitted to ICU             | Observational cohort study.                                     | One arm. No control group                                                                                                                                                                                                            | Elective surgical patients who would have previously been booked for level 2 care post-operatively.                                   | Opening of an extended recovery unit.                                                                              | Nil                                                        | Discharge destination after extended recovery unit admission                                          |
| Kastrup, Seeling et al. 2012     | To evaluate the effect of around-the-clock intensivist PACU coverage on the structure of ICU, and to demonstrate the economic effect on the hospital.                             | Retrospective cohort study.                                     | Intervention group: after the introduction of 24-hour intensivist coverage. Comparison group: prior to introduction of 24-hour                                                                                                       | All patients undergoing a surgical procedure (adults and children) between 1/01/08 – 30/04/11.                                        | Introduction of 24-hour intensivist coverage in PACU                                                               | Pre-existing PACU with no intensivist coverage             | PACU LOS<br>ICU LOS<br>Pre-operative days<br>Hospital LOS<br>Case mix index<br>Cost                   |

1  
2  
3  
4  
5  
6  
7  
8  
9  
10  
11  
12  
13  
14  
15  
16  
17  
18  
19  
20  
21  
22  
23  
24  
25  
26  
27  
28  
29  
30  
31  
32  
33  
34  
35  
36  
37  
38  
39  
40  
41  
42  
43  
44  
45  
46  
47  
48  
49  
50  
51  
52  
53  
54  
55  
56  
57  
58  
59  
60

|                                      |                                                                                                                                                                                                                   |                                                         |                                                                                                                                                                   |                                                                                                                 |                                                                                                              |                                                                                                                 |                                                                                                                                                 |
|--------------------------------------|-------------------------------------------------------------------------------------------------------------------------------------------------------------------------------------------------------------------|---------------------------------------------------------|-------------------------------------------------------------------------------------------------------------------------------------------------------------------|-----------------------------------------------------------------------------------------------------------------|--------------------------------------------------------------------------------------------------------------|-----------------------------------------------------------------------------------------------------------------|-------------------------------------------------------------------------------------------------------------------------------------------------|
|                                      |                                                                                                                                                                                                                   |                                                         | intensivist coverage.                                                                                                                                             |                                                                                                                 |                                                                                                              |                                                                                                                 |                                                                                                                                                 |
| Schweizer, Khatchaturian et al. 2002 | To assess the impact of a new PACU on ICU utilisation, hospital length of stay and complications following major non-cardiac surgery.                                                                             | Observational cohort study.                             | Intervention group: after opening of a new PACU. Control group: before opening of the new PACU                                                                    | Adult patients undergoing abdominal aortic reconstruction or resection of lung cancer during the study periods. | Opening of a new PACU (post-anaesthesia care unit)                                                           | Pre-existing PACU                                                                                               | Mortality<br>Reoperation<br>Secondary admission to ICU<br>Post-operative complications<br>Hospital LOS                                          |
| Street, Phillips et al. 2017         | To evaluate whether use of a discharge criteria tool for nursing assessment of patients in PACU would enhance nurses' recognition and response to patients at-risk of deterioration and improve patient outcomes. | Prospective non-randomised pre-post intervention study. | Intervention group: after the implementation of the Post-Anaesthetic Care Tool (PACT) Comparison group: prior to the implementation of PACT.                      | All adult patients undergoing elective surgery on days of data collection.                                      | Implementation of a Post Anaesthesia Care Tool (PACT)                                                        | Standard PACU care without PACT                                                                                 | Nursing management of symptoms<br>Rates of adverse events<br>Mortality<br>PACU LOS<br>Hospital LOS<br>Health service usage and healthcare costs |
| Tayrose, Newman et al. 2013          | To address the impact of rapid rehabilitation beginning in the recovery room on length-of-stay after primary hip and knee arthroplasty.                                                                           | Retrospective cohort study.                             | Intervention group: rapid rehabilitation group. Comparison group: standard rehabilitation protocol                                                                | 900 consecutive hip and knee arthroplasty patients                                                              | Rapid rehabilitation pilot program where the first two cases of the day were mobilised in the recovery room. | Remainder of cases received standard rehabilitation protocol starting on the morning of post-operative day one. | Overall hospital LOS<br>Hip arthroplasty subgroup LOS<br>Knee arthroplasty subgroup LOS                                                         |
| Zoremba, Dette et al. 2009           | To evaluate the impact of short-term respiratory physiotherapy during the PACU stay, on postoperative lung function tests and pulse oximetry values in obese adults after minor surgery.                          | Prospective randomised cohort study                     | Intervention group: physical therapy treatment group that performed incentive spirometry in the PACU Control group: patients who did not undergo physical therapy | 60 obese adult patients (BMI 30-40) ASA 2-3, scheduled for minor peripheral surgery.                            | Patients performed incentive spirometry in the PACU.                                                         | Not instructed to do any breathing exercises or spirometry.                                                     | Pulse oximetry and spirometry at 1, 2, 6 and 24 hours post-operatively                                                                          |

### Risk of bias within studies

The overall risk of bias within studies was serious. Critical risk of bias was identified in two studies[8, 9], serious risk of bias in three studies[5, 10, 11], moderate risk of bias in one study[7] and low risk of bias in two studies[5, 6]. Significant patient selection and allocation bias was the most common identified cause[5, 7, 8, 10, 11]; as patients in these studies were not randomly allocated to their post-operative level of care. The most clinically unwell patients were sent to ICU automatically, and only the lower risk patients, as deemed by the treating teams, were allowed a trial of care in the PACU. The risk of bias summary table provides further analysis, and comment regarding the risk of bias within individual studies.

**Table 2.** Risk of Bias Summary Table

| Source                           | Bias Due to Confounding | Bias in Selection & Allocation of Participants | Bias in Measurement of Interventions | Bias Due to Departures from Intended Interventions | Bias Due to Missing Data | Bias in Measurement of Outcomes | Bias in Selection of Reported Results | Overall Risk of Bias Judgement | Comments                                                                                                                                                          |
|----------------------------------|-------------------------|------------------------------------------------|--------------------------------------|----------------------------------------------------|--------------------------|---------------------------------|---------------------------------------|--------------------------------|-------------------------------------------------------------------------------------------------------------------------------------------------------------------|
| Callaghan, Lynch et al. 2005     | Low                     | Serious                                        | Low                                  | Moderate                                           | Low                      | Moderate                        | Low                                   | Serious                        | Significant selection bias of lower risk patients who were sent to OIR. Used predictive values for mortality (based on POSSUM variables) as a comparison measure. |
| Eichenberger, Haller et al. 2011 | Low                     | Low                                            | Low                                  | Low                                                | Low                      | Low                             | Low                                   | Low                            | High quality study. No specific concerns from review authors.                                                                                                     |
| Fraser and Nair 2016             | Low                     | Moderate                                       | Moderate                             | Moderate                                           | Critical                 | Serious                         | Moderate                              | Critical                       | Over 25% of data missing. No clear objective stated, no explanation of methodology. Poorly defined selection criteria.                                            |

1  
2  
3  
4  
5  
6  
7  
8  
9  
10  
11  
12  
13  
14  
15  
16  
17  
18  
19  
20  
21  
22  
23  
24  
25  
26  
27  
28  
29  
30  
31  
32  
33  
34  
35  
36  
37  
38  
39  
40  
41  
42  
43  
44  
45  
46  
47  
48  
49  
50  
51  
52  
53  
54  
55  
56  
57  
58  
59  
60

For peer review only

|                                      |          |         |     |          |     |         |          |          |                                                                                                                                                                                                                                                                                      |
|--------------------------------------|----------|---------|-----|----------|-----|---------|----------|----------|--------------------------------------------------------------------------------------------------------------------------------------------------------------------------------------------------------------------------------------------------------------------------------------|
| Kastrup, Seeling et al. 2012         | Low      | Serious | Low | Moderate | Low | Low     | Low      | Moderate | Significant selection bias of patients allocated to PACU, intermediate care unit or ICU by intensive care physician. This study also included a population of children (numbers not given).                                                                                          |
| Schweizer, Khatchaturian et al. 2002 | Critical | Serious | Low | Low      | Low | Low     | Low      | Serious  | Introduction of preoperative risk assessment guidelines (AHA/ACC) with increased antiadrenergic administration pre-operatively confounds results. Significant selection bias, no admission criteria stated for PACU or ICU. Patient allocation was determined by treating clinician. |
| Street, Phillips et al. 2017         | Low      | Serious | Low | Moderate | Low | Serious | Critical | Serious  | Power analysis included all patients (including day surgery) when investigating post-operative outcomes after PACU discharge, giving inaccurate results. Poor objective (with different objectives stated in the abstract and the article).                                          |

1  
2  
3  
4  
5  
6  
7  
8  
9  
10  
11  
12  
13  
14  
15  
16  
17  
18  
19  
20  
21  
22  
23  
24

|                             |     |          |         |          |     |         |     |          |                                                                                                                                                                                                                                         |
|-----------------------------|-----|----------|---------|----------|-----|---------|-----|----------|-----------------------------------------------------------------------------------------------------------------------------------------------------------------------------------------------------------------------------------------|
| Tayrose, Newman et al. 2013 | Low | Critical | Serious | Moderate | Low | Serious | Low | Critical | Patients who were deemed too unwell to be mobilised in recovery, were included in analysis for the standard recovery group. Operative order bias, by including the first two cases of the day. No methods reported for data collection. |
| Zoremba, Dette et al. 2009  | Low | Low      | Low     | Low      | Low | Low     | Low | Low      | Good quality study. However, does not address the longer-term outcomes of interest.                                                                                                                                                     |

### Results of individual studies

The results of each individual study are presented in the results of included study table (Table 3). Four studies [5, 7, 9, 10] investigated non-ICU pathways for care of post-operative patients, and these pathways were not associated with increased mortality rates. Four of eight studies also examined hospital length of stay [5, 7, 8, 10], and two found the intervention was associated with decreased length of stay and two found no association (Table 3). Kastrup et al demonstrated a significant decrease in length of stay for all surgical patients after their introduction of 24-hour intensivist coverage to the PACU [7]. Tayrose et al, also demonstrated a decreased length of stay for patients who received early mobilisation in PACU[8]. However, Callaghan et al and Schweizer et al did not demonstrate any statistically significant decrease in length of stay. PACU length of stay was another common outcome measure in three of the included studies[6, 7, 11]. Eichenberger et al demonstrated a decreased PACU length of stay for ASA 1-2 patients, but no difference for ASA3-5, while Kastrup et al and Street both demonstrated an increase in PACU length of stay following their interventions[7, 11]. Due to the variations in study designs, we were unable to combine the data for further aggregate analysis.

**Table 3. Results of Included Studies**

| Source | Intervention | Mortality | Other Key results |
|--------|--------------|-----------|-------------------|
|--------|--------------|-----------|-------------------|

56  
57  
58  
59  
60

|                                       |                                                                                                                    |                                                                                                                                                                                                |                                                                                                                                                                                                                                                                                                                                                                                                                                                                                                                                                                                                                                                                                                                                              |
|---------------------------------------|--------------------------------------------------------------------------------------------------------------------|------------------------------------------------------------------------------------------------------------------------------------------------------------------------------------------------|----------------------------------------------------------------------------------------------------------------------------------------------------------------------------------------------------------------------------------------------------------------------------------------------------------------------------------------------------------------------------------------------------------------------------------------------------------------------------------------------------------------------------------------------------------------------------------------------------------------------------------------------------------------------------------------------------------------------------------------------|
| Callaghan, Lynch et al. 2005          | Introduction of OIR (Overnight Intensive Recovery)                                                                 | No significant difference between groups. Overall in hospital mortality was 2%. fewer than predicted patients died (observed mortality 3 versus predicted 95% CI 8-21).                        | Morbidity: No significant difference between groups. Overall, fewer than predicted patients experienced one or more complications (observed 101 versus predicted morbidity 103-125 95%CI)<br>Hospital length of stay: No significant difference between groups                                                                                                                                                                                                                                                                                                                                                                                                                                                                               |
| Eichenberger, Haller et al. 2011      | Introduction of a two-track clinical pathway that clearly defined & coordinated medical and nursing interventions. | Overall in-hospital mortality decreased significantly from 68 patients (1.5%) to 39 patients (0.8%) (P<0.001). In ASA 3-5 patients, mortality was nearly halved (adjusted OR 0.40) (P< 0.001). | Unplanned ICU admission: Total number of unplanned ICU admissions after stay in PACU decreased from 113 (2.5%) to 90 (1.9%) (adjusted OR 0.70) (P=0.70)<br>PACU length of stay: After adjustment for differences in patients and procedures. Statistically significant decrease in PACU length of stay for ASA 1-2 patients (adjusted P< 0.001). There was no difference for ASA 3-5 patients (adjusted P= 0.768)                                                                                                                                                                                                                                                                                                                            |
| Fraser and Nair 2016                  | Opening of an extended recovery unit.                                                                              | Not investigated                                                                                                                                                                               | Discharge destination after extended recovery unit admission: Data from the first 119 patients admitted to the Extended Recovery unit were collected. 76 patients (63.9%) who would have otherwise gone to critical care were able to go back to the ward.                                                                                                                                                                                                                                                                                                                                                                                                                                                                                   |
| Kastrup, Seeling et al. 2012          | Introduction of 24-hour intensivist coverage in PACU                                                               | No difference between groups                                                                                                                                                                   | Hospital length of stay: Overall length of stay decreased significantly for all surgical patients. From 8.3 (+/- 11.8) days to 7.71 (+/- 10.99) days.<br>PACU length of stay: More patients were treated in the PACU for a longer period of time. Mean LOS increased from 0.27 (+/- 0.2) days to 0.45 (+/- 0.41) days<br>Cases treated in ICU: Mean number of cases treated in the ICU per month decreased significantly from 164.7 (+/- 14.37) to 133.8 (+/- 19.42) (P<0.001)<br>ICU treatment days: Mean number of treatment days per month did not change. Relative number of patients with longer LOS (>7 days) increased after introduction of PACU, whereas average number of patients staying <24 hours in the ICU decreased by ~50%. |
| Schweizer, Khatchatourian et al. 2002 | Opening of a new PACU (post-anaesthesia care unit)                                                                 | No difference between study periods                                                                                                                                                            | Morbidity: Vascular patients had decreased rates of myocardial infarction (6.4% vs 1.3% p=0.009) and decreased rates of pulmonary oedema (5.1% vs 1.7% p=0.08)<br>Re-operation: No difference between study periods<br>Hospital length of stay: Total hospital length of stay did not change over time                                                                                                                                                                                                                                                                                                                                                                                                                                       |
| Street, Phillips et al. 2017          | Implementation of a Post Anaesthesia Care Tool (PACT)                                                              | No significant difference between groups.                                                                                                                                                      | Patient management in PACU: More requests for medical review 19% vs 30% (P<0.001), more patients with MET criteria modified by an anaesthetist 6.5% vs 13.8% (P<0.001), higher rates of analgesia administration 37.3% vs 54.2% (P=0.001).<br>Adverse events in PACU: More adverse events recorded in PACU in phase 2, 29.4% vs 21.2% (P<0.001). May represent a greater recognition of adverse events in PACU after implementation of PACT.<br>Adverse events after PACU: Significant decrease in rates of clinical deterioration and significant decrease in cardiovascular events after PACU discharge.<br>PACU length of stay: Increase in median PACU length of stay from 45min in phase 1 to 53min in phase 2 (P<0.001)                |
| Tayrose, Newman et al. 2013           | Rapid rehabilitation pilot program where the first two cases of the day were mobilised in the recovery room.       | Not investigated                                                                                                                                                                               | Overall hospital length of stay: Rapid rehabilitation had significantly decreased length of stay that patient who began therapy on post-op day 1 (P<0.001).<br>Hip arthroplasty subgroup length of stay: Decreased length of stay for rapid rehab patients in the hip arthroplasty subgroup (P<0.001).<br>Knee arthroplasty subgroup length of stay: Decreased LOS for rapid rehab patients in the knee arthroplasty subgroup (P=0.16).                                                                                                                                                                                                                                                                                                      |



1  
2  
3  
4  
5  
6  
7  
8  
9  
10  
11  
12

|                            |                                                      |                  |                                                                                                                                                                                                                                                                                                                                                                                                                                                                                                                                                                                                                                                                                |
|----------------------------|------------------------------------------------------|------------------|--------------------------------------------------------------------------------------------------------------------------------------------------------------------------------------------------------------------------------------------------------------------------------------------------------------------------------------------------------------------------------------------------------------------------------------------------------------------------------------------------------------------------------------------------------------------------------------------------------------------------------------------------------------------------------|
| Zoremba, Dette et al. 2009 | Patients performed incentive spirometry in the PACU. | Not investigated | Pulse oximetry: Significantly improved pulse oximetry values at 1 and 2 hours in PACU, and at 6 hours post mobilisations ( $P<0.0001$ ), and significant improvement in pulse oximetry values at 24 hours post-op ( $P<0.0001$ ).<br>Spirometry results: Incentive spirometry group recovered lung function faster in during the PACU stay ( $P<0.0001$ ). Lung function had almost reached baseline at 6 hours in the incentive spirometry group, however the control group were up to 25% below baseline ( $P<0.0001$ ). Overall difference in lung function between groups had decreased 24 hours after surgery, but significant differences still remained ( $P=0.0040$ ). |
|----------------------------|------------------------------------------------------|------------------|--------------------------------------------------------------------------------------------------------------------------------------------------------------------------------------------------------------------------------------------------------------------------------------------------------------------------------------------------------------------------------------------------------------------------------------------------------------------------------------------------------------------------------------------------------------------------------------------------------------------------------------------------------------------------------|

13  
14  
15  
16  
17  
18  
19  
20  
21  
22  
23  
24  
25  
26  
27  
28  
29  
30  
31  
32  
33  
34  
35  
36  
37  
38  
39  
40  
41  
42  
43  
44  
45  
46  
47  
48  
49  
50  
51  
52  
53  
54  
55  
56  
57  
58  
59  
60

### Synthesis of results

The overall quality of studies was poor, with significant selection and allocation bias; however, managing post-operative patients outside of the ICU is not associated with worse patient outcomes, especially in an extended recovery setting. There was no increase in mortality rates identified in any of the four studies investigating non-ICU pathways for post-operative patients [5, 7, 9, 10]. Use of extended recovery also meant that ward discharge was usual, bypassing the ICU[5, 9]. Kastrup et al showed that the addition of intensivist coverage to PACU was associated with decreased length of hospital stay, and Tayrose et al demonstrated that early mobilisation in PACU was associated with decreased length of hospital stay, but significant pre-selection bias for early mobilisation of arthroplasty patients confounds results[8]. Other changes to the PACU environment, including the opening of a new PACU[10] and introduction of Overnight Intensive Recovery[5] did not appear to have any effect on hospital length of stay. The use of a two-track pathway for nurse-driven and physician-driven PACU management and discharge appears to be beneficial in reducing PACU length of stay, and improving outcomes after discharge from PACU, including a significant decrease in post-operative mortality[6]. However, introduction of a Post Anaesthetic Care Tool, and introduction of 24-hour intensivist coverage in PACU was associated with increased length of stay in PACU[7, 11]. There were no long-term positive effects were investigated for the use of incentive spirometry[12].

### Risk of bias across studies and additional analyses

Risk of bias across studies for the key common outcome measures of mortality, hospital length of stay and PACU length of stay was high due to the study designs, with no level I or II evidence available. There was no additional analysis required for this review.

## DISCUSSION

### Summary of evidence

1  
2  
3 Of the eight studies included in this systematic review, only one was a prospective randomised cohort  
4 study[12], and one was a prospective non-randomised pre-post intervention study[11]. The rest were  
5 observational and retrospective cohort studies[5-10]. There was no level I or level II evidence available for  
6 inclusion in this review. Common outcome measures identified, included mortality, hospital length of stay  
7 and PACU length of stay. Despite the poor quality of evidence, we found that managing selected higher  
8 risk post-operative patients in the PACU instead of ICU was not associated with worse outcomes[5, 7, 9,  
9 10], and may be associated with decreased unnecessary ICU admissions, with potential large cost savings.  
10 However, due to study types, and the significant selection and allocation bias of patients within these  
11 studies, the overall strength of evidence is only moderate. The addition of intensivist coverage to PACU  
12 was associated with decreased hospital length of stay in one study [7], as was the rapid mobilisation of  
13 arthroplasty patients[8]. However, the introduction of overnight intensive recovery and the opening of a  
14 new PACU had no effect on hospital length of stay[5, 10]. The introduction of a two-track clinical pathway  
15 appeared to be associated with a decreased PACU length of stay[6], however the introduction of a Post  
16 Anaesthesia Care Tool and introduction of intensivist coverage was associated with increased PACU length  
17 of stay[7, 11]. This has significant implications for future research and health resource allocation. Further  
18 studies that prospectively randomly allocate patients to a treatment arm would be of great value,  
19 however, we acknowledge that due to the risk profile and care requirements of surgical patients, this may  
20 not be possible until further safety is proven.  
21  
22  
23  
24  
25  
26  
27  
28  
29  
30  
31  
32  
33

### 34 35 **Limitations**

36 The protocol development and search strategy for this review were developed in accordance with the  
37 PRISMA statement. With help from experienced health science research librarians, we attempted to  
38 ensure that all references were captured; however, it is possible that studies were missed. Due to the  
39 variation in study design and primary outcome measures, we were unable to combine data for aggregate  
40 analysis or meta-analysis. The narrative synthesis of key results may introduce bias; however, steps were  
41 taken to minimise this, including the review of all data by a second author. The most significant limitation  
42 of this systematic review, was the high risk of bias within the individual studies included in the review.  
43 Selection and allocation bias, missing data, inclusion of inappropriate patient groups such as day surgery,  
44 and lack of fidelity assessment were some of the key flaws within each study. However, the thorough risk  
45 of bias assessment and its implications on reported results allows readers to interpret the data  
46 appropriately.  
47  
48  
49  
50  
51  
52  
53  
54  
55  
56  
57  
58  
59  
60

## Conclusions

Managing selected post-operative patients in PACU instead of ICU does not appear to be associated with worse patient outcomes, however due to study design, and the high risk of bias within studies, the strength of evidence is moderate at best. The addition of intensivist coverage to PACU and early mobilisation was associated with decreased hospital length of stay. While the use of a two-track clinical pathway decreased PACU length of stay, however there is no evidence of this improving patients' overall outcomes. This is the first systematic review to investigate the health service initiatives undertaken in recovery rooms, and their impact on patient outcomes after PACU discharge. There is a striking paucity of literature on this topic, with very few high-quality studies; and further research is required to evaluate and improve the care of post-operative patients in the recovery room setting.

## FUNDING

This systematic review was undertaken as part of a Masters of Clinical Sciences with the University of Adelaide, funded by the Australian Government's Research Training Program (Commonwealth funded). No conflicts of interest known at the time of writing the review. Affiliations; The Royal Adelaide Hospital and the University of Adelaide.

## REFERENCES

1. Aps, C., Surgical critical care: the Overnight Intensive Recovery (OIR) concept. *Br J Anaesth*, 2004. **92**(2): p. 164-6.
2. Swart, M., J.B. Carlisle, and J. Goddard, Using predicted 30 day mortality to plan postoperative colorectal surgery care: a cohort study. *Br J Anaesth*, 2017. **118**(1): p. 100-104.
3. Bellomo, R., et al., A before and after trial of the effect of a high-dependency unit on post-operative morbidity and mortality. *Crit Care Resusc*, 2005. **7**(1): p. 16-21.
4. Katz, S.G. and R.D. Kohl, Selective use of the intensive care unit after nonaortic arterial surgery. *J Vasc Surg*, 1996. **24**(2): p. 235-9.
5. Callaghan, C.J., et al., Overnight intensive recovery: elective open aortic surgery without a routine ICU bed. *Eur J Vasc Endovasc Surg*, 2005. **30**(3): p. 252-8.
6. Eichenberger, A.S., et al., A clinical pathway in a post-anaesthesia care unit to reduce length of stay, mortality and unplanned intensive care unit admission. *Eur J Anaesthesiol*, 2011. **28**(12): p. 859-66.
7. Kastrup, M., et al., Effects of intensivist coverage in a post-anaesthesia care unit on surgical patients' case mix and characteristics of the intensive care unit. *Crit Care*, 2012. **16**(4): p. R126.
8. Tayrose, G., et al., Rapid mobilization decreases length-of-stay in joint replacement patients. *Bull Hosp Jt Dis* (2013), 2013. **71**(3): p. 222-6.

9. Fraser, C. and A. Nair, Reducing critical care admissions after elective surgery by opening an extended recovery unit at the Northern General Hospital, Sheffield. *Anaesthesia*, 2016. **71**: p. 50.
10. Schweizer, A., et al., Opening of a new postanesthesia care unit: impact on critical care utilization and complications following major vascular and thoracic surgery. *J Clin Anesth*, 2002. **14**(7): p. 486-93.
11. Street, M., et al., Effect of a newly designed observation, response and discharge chart in the Post Anaesthesia Care Unit on patient outcomes: a quasi-experimental study in Australia. *BMJ Open*, 2017. **7**(12): p. e015149.
12. Zoremba, M., et al., Short-term respiratory physical therapy treatment in the PACU and influence on postoperative lung function in obese adults. *Obes Surg*, 2009. **19**(10): p. 1346-54.

## AUTHOR STATEMENT

CL developed the review protocol, completed all title and abstract screening, full text reviews and data analysis. She completed the risk of bias assessment with GL. CL also drafted and revised the manuscript. GL developed the initial review question, and assisted writing the review protocol. He also completed the full text reviews, reviewed all data of included studies and completed the risk of bias assessment with CL. He also critically appraised the draft manuscript. DS assisted with developing the initial review question, and reviewed all included articles for consensus. He also critically appraised the draft manuscript, and assisted with revisions. GM reviewed all included articles for consensus, and critically appraised the manuscript. All authors have given final approval for publication.

## Appendix 1.

### PubMed Electronic Search Strategy

| Postoperative period                 | Adults                                         | Recovery room                                                       | Patient outcomes                            |
|--------------------------------------|------------------------------------------------|---------------------------------------------------------------------|---------------------------------------------|
| "Postoperative Period"[mh]           | "adult"[mh] OR adult*[tiab]                    | "recovery room"[mh] OR PACU[tiab]                                   | "Patient outcome assessment"[mh] OR         |
| Anesthesia[mh]                       | OR elderly[tiab]                               | OR "recovery room"[tiab]                                            | "treatment outcome"[mh]                     |
| "surgical procedures, operative"[mh] | "young adult*[tiab] OR OR "young people"[tiab] | OR "advanced recovery room"[tiab] OR "extended recovery room"[tiab] | OR mortality[mh] OR "length of stay"[mh] OR |
| "perioperative period"[mh]           | OR "aged person"[tiab]                         | OR "post                                                            | complications"[mh] OR                       |

|                                                                                                                                                                                                                                                                                                                                                             |                                                                                                                                                                                                                                                                                                                                                                                  |                                                               |                                                                                                                                                                                                                                                                                                         |                                                                                                                                                                                                                                                                                                                                                                                                                                                                               |
|-------------------------------------------------------------------------------------------------------------------------------------------------------------------------------------------------------------------------------------------------------------------------------------------------------------------------------------------------------------|----------------------------------------------------------------------------------------------------------------------------------------------------------------------------------------------------------------------------------------------------------------------------------------------------------------------------------------------------------------------------------|---------------------------------------------------------------|---------------------------------------------------------------------------------------------------------------------------------------------------------------------------------------------------------------------------------------------------------------------------------------------------------|-------------------------------------------------------------------------------------------------------------------------------------------------------------------------------------------------------------------------------------------------------------------------------------------------------------------------------------------------------------------------------------------------------------------------------------------------------------------------------|
| 1<br>2<br>3<br>4<br>5<br>6<br>7<br>8<br>9<br>10<br>11<br>12<br>13<br>14<br>15<br>16<br>17<br>18<br>19<br>20<br>21<br>22<br>23<br>24<br>25<br>26<br>27<br>28<br>29<br>30<br>31<br>32<br>33<br>34<br>35<br>36<br>37<br>38<br>39<br>40<br>41<br>42<br>43<br>44<br>45<br>46<br>47<br>48<br>49<br>50<br>51<br>52<br>53<br>54<br>55<br>56<br>57<br>58<br>59<br>60 | <p>“Postoperative period”[tiab] OR “post anaesthes*”[tiab] OR “post anesthes*”[tiab] OR postoperative[tiab] OR “post operative”[tiab] OR "Anesthesia recovery period"[tiab] OR "Anaesthesia recovery period"[tiab] OR anesthesia[tiab] OR anaesthesia[tiab] "surgical procedures"[tiab] OR surger*[tiab] OR operation*[tiab] OR operative[tiab] "perioperative period"[tiab]</p> | <p>OR “aged people”[tiab] OR senior*[tiab] OR frail[tiab]</p> | <p>“aged anaesthesia care reoperation*[mh] OR unit*”[tiab] OR “post anesthesia care assessment”[tiab] OR unit*”[tiab] OR “postanaesthesia care or outcome*[tiab] OR unit*”[tiab] OR “postanesthesia care outcome”[tiab] OR unit*”[tiab] OR “post operative recovery outcome*”[tiab] OR unit*”[tiab]</p> | <p>reoperation*[mh] OR "Patient outcome assessment"[tiab] OR "patient outcome*”[tiab] OR or outcome*[tiab] OR "treatment outcome”[tiab] OR OR mortality[tiab] OR "fatal outcome*”[tiab] OR OR morbidity[tiab] OR "length of stay"[tiab] OR OR "postoperative complications"[tiab] OR OR "return to theatre"[tiab] OR OR complication*[tiab] OR OR "intensive care"[tiab] OR OR "intensive care admission"[tiab] OR OR "health outcome"[tiab] OR OR "adverse event*”[tiab]</p> |
|-------------------------------------------------------------------------------------------------------------------------------------------------------------------------------------------------------------------------------------------------------------------------------------------------------------------------------------------------------------|----------------------------------------------------------------------------------------------------------------------------------------------------------------------------------------------------------------------------------------------------------------------------------------------------------------------------------------------------------------------------------|---------------------------------------------------------------|---------------------------------------------------------------------------------------------------------------------------------------------------------------------------------------------------------------------------------------------------------------------------------------------------------|-------------------------------------------------------------------------------------------------------------------------------------------------------------------------------------------------------------------------------------------------------------------------------------------------------------------------------------------------------------------------------------------------------------------------------------------------------------------------------|

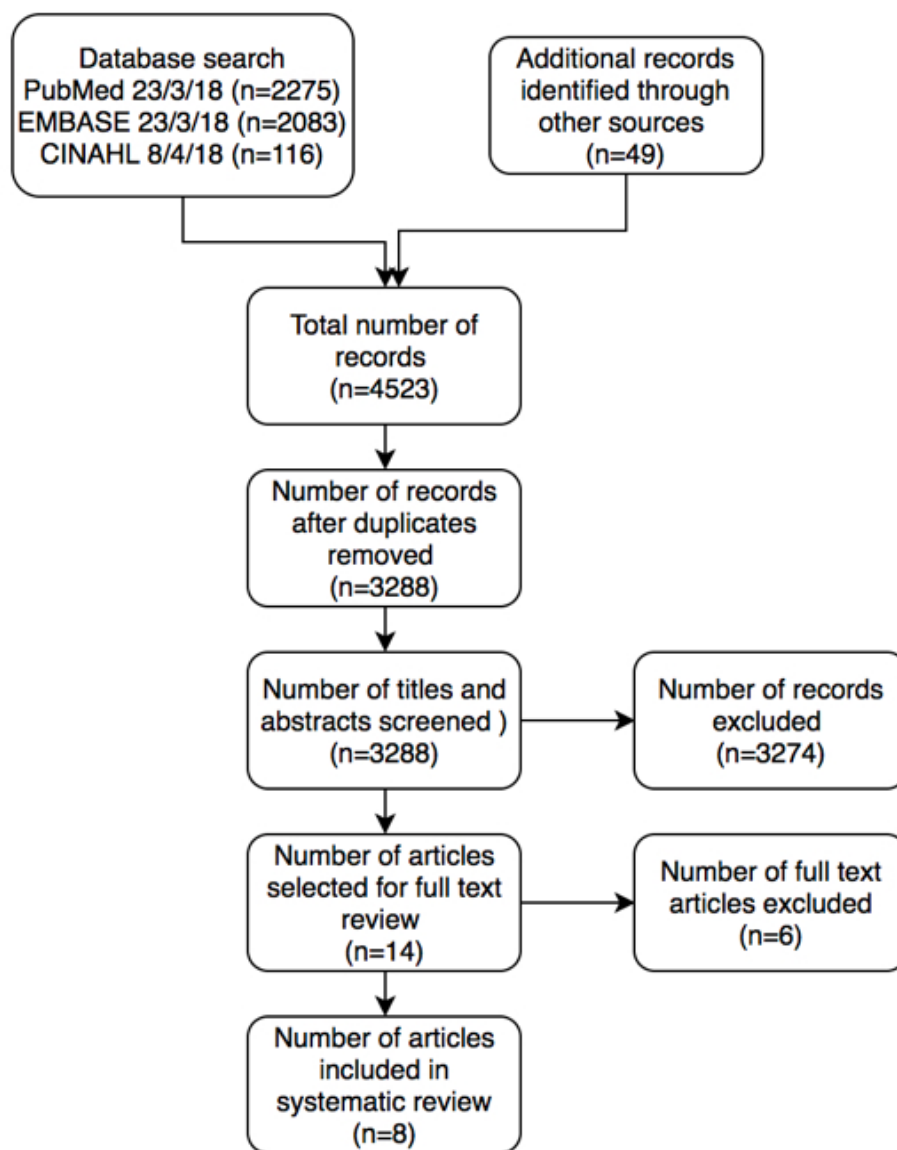

Figure 1

## Characteristics of Included Studies Additional Tables

### Participants additional table:

| Source                                | Location and Setting                                                                                                                                                  | Inclusion Criteria                                                                                                                                                                                                                             | Exclusion Criteria                                                                                                                                                               | Ages involved                                                                                                                      | Gender                                                                                     | Exclusion of important groups                                                                                 | Numbers involved                                       |
|---------------------------------------|-----------------------------------------------------------------------------------------------------------------------------------------------------------------------|------------------------------------------------------------------------------------------------------------------------------------------------------------------------------------------------------------------------------------------------|----------------------------------------------------------------------------------------------------------------------------------------------------------------------------------|------------------------------------------------------------------------------------------------------------------------------------|--------------------------------------------------------------------------------------------|---------------------------------------------------------------------------------------------------------------|--------------------------------------------------------|
| Callaghan, Lynch et al. 2005          | Addenbrooke's Hospital. Cambridge, United Kingdom.<br><br>Cambridge vascular unit, OIR (based in PACU) and ICU, within a major teaching hospital and research centre. | All patients undergoing elective open aortic surgery between 1/01/98 and 31/12/02.                                                                                                                                                             | Patients with missing case notes.                                                                                                                                                | Median age for all patients was 72 (66-77)                                                                                         | Intervention group: 88% males<br>Comparison group: 85% males                               | No group appears to be excluded from the study. However, some multi-morbid patients were not offered surgery. | Intervention group n=152<br>Comparison group n=26      |
| Eichenberger, Haller et al. 2011      | Geneva hospital Switzerland.<br><br>Post Anaesthesia Care Unit (PACU), within a tertiary teaching hospital.                                                           | All elective and non-elective inpatients, who underwent a surgical or endoscopic procedure under anaesthesia (including major surgery and high risk surgical patients required temporary NIV, haemodynamic support and continuous monitoring). | Exclusion: multi-trauma, persistent intraoperative shock, transplants, cardiac surgery and intra-operative respiratory failure.                                                  | Before period:<br><49yo 34.25%,<br>49-67yo 32.6%,<br>>67yo 33.3%<br>After period:<br><49yo 34.7%,<br>49-67yo 32.5%,<br>>67yo 32.8% | Intervention group: male 56.3%, female 43.7%<br>Comparison group: male 55.9%, female 44.1% | No groups excluded apart from those patients already specified in the exclusion criteria.                     | Intervention group n=3345<br>Comparison group n=3030   |
| Fraser and Nair 2016                  | Northern General Hospital Sheffield, England.<br><br>Extended recovery unit within a tertiary teaching hospital, major trauma centre.                                 | Elective surgical patients who would have previously been booked for level 2 care post-operatively. Including patients with significant comorbidities, endovascular AAA repair, carotid endarterectomy and revision arthroplasty.              | Not stated                                                                                                                                                                       | Not stated                                                                                                                         | Not stated                                                                                 | No apparent exclusion of specific population groups. Not specifically addressed.                              | Intervention group n=119                               |
| Kastrup, Seeling et al. 2012          | The Charite-University Hospital Campus Mitte Berlin, Germany.<br>PACU within a large tertiary teaching hospital.                                                      | All patients undergoing a surgical procedure (adults and children) between 1/01/08 – 30/04/11                                                                                                                                                  | Ambulatory surgical patients, patients who were readmitted to hospital for the same reason as the initial admission (due to issues with accuracy of the administrative database) | Not given                                                                                                                          | Not stated                                                                                 | No apparent exclusion of specific population groups. Not specifically addressed.                              | Intervention group n=26118<br>Comparison group n=24972 |
| Schweizer, Khatchatourian et al. 2002 | The University Hospital of Geneva, Switzerland.<br><br>PACU within a tertiary teaching hospital.                                                                      | Adult patients undergoing abdominal aortic reconstruction or resection of lung cancer.                                                                                                                                                         | Exclusion criteria not stated                                                                                                                                                    | Not stated                                                                                                                         | Not stated                                                                                 | No apparent exclusion of specific population groups. Not specifically addressed.                              | Intervention group n= 485<br>Comparison group n= 448   |

|                                                          |                              |                                                                                                                      |                                                                                                                                                                                                                                |                                                                                                                                                                                                                                                                                                                                            |                                                                                      |                                                                                               |                                                                                                                                                                                                    |                                                    |
|----------------------------------------------------------|------------------------------|----------------------------------------------------------------------------------------------------------------------|--------------------------------------------------------------------------------------------------------------------------------------------------------------------------------------------------------------------------------|--------------------------------------------------------------------------------------------------------------------------------------------------------------------------------------------------------------------------------------------------------------------------------------------------------------------------------------------|--------------------------------------------------------------------------------------|-----------------------------------------------------------------------------------------------|----------------------------------------------------------------------------------------------------------------------------------------------------------------------------------------------------|----------------------------------------------------|
| 1<br>2<br>3<br>4<br>5<br>6<br>7                          | Street, Phillips et al. 2017 | Three hospitals within one Australian metropolitan healthcare organisation.<br><br>PACUs within the three hospitals. | All adult patients undergoing elective surgery on days of data collection before and after the implementation of PACT (before period July-Oct 2012) (after period July-Sept 2014). (Half the patients were day surgery cases.) | Emergency surgery, minor procedure only requiring sedation, post-operative planned admission to ICU.                                                                                                                                                                                                                                       | Intervention group: mean= 50.87 (SD 17.4)<br>Comparison group: mean= 52.14 (SD 18.6) | Intervention group: male= 38.8%, female= 61.2%<br>Comparison group: male=41.6%, female= 58.4% | No specific groups appear to have been excluded from the study.                                                                                                                                    | Intervention group n=694<br>Comparison group n=723 |
| 8<br>9<br>10<br>11<br>12<br>13<br>14                     | Tayrose, Newman et al. 2013  | NYU hospital for Joint Diseases, New York.<br><br>Recovery room and general orthopaedic ward.                        | 900 consecutive hip and knee arthroplasty patients.                                                                                                                                                                            | Not stated                                                                                                                                                                                                                                                                                                                                 | Intervention group: mean= 63.7<br>Comparison group: mean= 64.3                       | Intervention group: male=125, female=206<br>Comparison group: male= 216, female=353           | Unable to assess, and exclusion criteria are not stated.                                                                                                                                           | Intervention group n=331<br>Comparison group n=569 |
| 15<br>16<br>17<br>18<br>19<br>20<br>21<br>22<br>23<br>24 | Zoremba, Dette et al. 2009   | University of Marburg, Germany.<br><br>PACU within a tertiary teaching hospital.                                     | 60 obese adult patients (BMI 30-40) ASA 2-3, scheduled for minor peripheral surgery. Minimum surgery duration=40min, maximum surgery duration= 120 min.                                                                        | Abdominal surgery, surgery requiring head-down tilt, history of GORD, hiatus hernia, likely difficult intubation, pregnancy, emergency operation, severe renal dysfunction, asthma requiring therapy, cardiac disease associated with dyspnoea (NYHA >2), severe psychiatric disorders or difficulties in cooperating during measurements. | Intervention group: mean 52 years<br>Control group: mean 53 years                    | Not stated                                                                                    | Multimorbid patients with ASA >3 have been excluded (this is stated specifically in the exclusion criteria). All major surgery (including abdominal surgery) has also been intentionally excluded. | Intervention group n=30<br>Control group n=30      |

25  
26  
27  
28  
29  
30  
31  
32  
33  
34  
35  
36  
37  
38  
39  
40  
41  
42  
43  
44  
45  
46



## Interventions additional table:

| <i>Source</i>                    | <i>Intervention name</i>                                                                                           | <i>Aims and rationale</i>                                                                                                                                                                                                                                                               | <i>Methods</i>                                                                                                                                                                                                                                                                                                                                                                                                                                                                                                                                                           | <i>Intervention delivery (staff and location)</i>                                                                                                                                                                                                                                                                                 | <i>Timing of intervention</i>                                                                                                                     | <i>Tailoring of intervention</i>                                                                                                     | <i>Modifications made</i>                                                                                                      | <i>Assessment of fidelity</i>                                                                                                                                                              |
|----------------------------------|--------------------------------------------------------------------------------------------------------------------|-----------------------------------------------------------------------------------------------------------------------------------------------------------------------------------------------------------------------------------------------------------------------------------------|--------------------------------------------------------------------------------------------------------------------------------------------------------------------------------------------------------------------------------------------------------------------------------------------------------------------------------------------------------------------------------------------------------------------------------------------------------------------------------------------------------------------------------------------------------------------------|-----------------------------------------------------------------------------------------------------------------------------------------------------------------------------------------------------------------------------------------------------------------------------------------------------------------------------------|---------------------------------------------------------------------------------------------------------------------------------------------------|--------------------------------------------------------------------------------------------------------------------------------------|--------------------------------------------------------------------------------------------------------------------------------|--------------------------------------------------------------------------------------------------------------------------------------------------------------------------------------------|
| Callaghan, Lynch et al. 2005     | Introduction of OIR (Overnight Intensive Recovery)                                                                 | The majority of vascular surgical patients were routinely admitted to ICU post-operatively. However, several studies have demonstrated that extubation in theatre after AAA repair is safe[1] and that routine admission to ICU after infra-renal aortic surgery is unnecessary [2, 3]. | <p>Surgical patients assessed preoperatively by vascular surgeon and anaesthetist (ECG and full bloods). Patient referred to specialist if further pre-operative assessment is required.</p> <p>OIR located in theatre recovery. Maximum stay 24 hours. No facilities for mechanical ventilation or renal replacement therapy.</p> <p>Patients reviewed in the morning by surgical teams, and discharged to the ward if stable. If ongoing instability, patients transferred to ICU</p> <p>Face to face delivery of intervention</p> <p>No co-interventions apparent</p> | <p>Nurse to patient ratio 1:1</p> <p>Day time medical coverage provided by PACU anaesthetist and vascular surgical teams. Overnight medical care provided by the on-call anaesthetist and general surgical teams.</p> <p>No specific training or upskilling period detailed. Pre-existing medical and nursing skills required</p> | Intervention provided post-operatively for a maximum of 24 hours.                                                                                 | Post-operative medical care tailored to each patient. However, the OIR environment was not changed during the study.                 | OIR does not appear to have been modified or adapted during the study                                                          | No specific mention of steps taken to ensure fidelity in the OIR pathway. Anaesthetic techniques do appear to have been standardised, as well as post-operative analgesia.                 |
| Eichenberger, Haller et al. 2011 | Introduction of a two-track clinical pathway that clearly defined & coordinated medical and nursing interventions. | Post-operative complications have a major impact on survival, especially in the older population [4, 5]. A clinical review of current practices prior to implementation of the pathway showed that poorly defined                                                                       | <p>Fast track pathway: nurse driven, ASA 1-2. At 15min intervals nursing staff evaluate patients' vitals using Aldrete score, and pain is assessed using verbal numeric rating scale.</p> <p>Slow track pathway: physician driven, ASA 3-</p>                                                                                                                                                                                                                                                                                                                            | Fast-track programme: initial post-operative care prescribed by the anaesthetist and provided by the PACU nursing staff. Ongoing care is delivered by the PACU nursing staff only (unless                                                                                                                                         | Fast-track programme: care provided immediately post-operatively. Discharge performed without further communication with the PACU anaesthetist if | Initial post-op treatment plan prescribed by the treating anaesthetist was tailored to the patient and their specific medical needs. | No adaptations appear to have been made to either pathway during the study period. However, this is not specifically discussed | <p>Fast track pathway: methods of ensuring adherence to the pathway not discussed.</p> <p>Slow track pathway: adherence to the clinical pathway was ensured during daily rounds by the</p> |

|                              |                                              |                                                                                                                                                                                                                                                                                                                                |                                                                                                                                                                                                                                                                                                                                                                                                                              |                                                                                                                                                                                                                                                                                                                                            |                                                                                                                                                                                                                                                                           |                                                                        |                                                        |                                                                                                                                                                                    |
|------------------------------|----------------------------------------------|--------------------------------------------------------------------------------------------------------------------------------------------------------------------------------------------------------------------------------------------------------------------------------------------------------------------------------|------------------------------------------------------------------------------------------------------------------------------------------------------------------------------------------------------------------------------------------------------------------------------------------------------------------------------------------------------------------------------------------------------------------------------|--------------------------------------------------------------------------------------------------------------------------------------------------------------------------------------------------------------------------------------------------------------------------------------------------------------------------------------------|---------------------------------------------------------------------------------------------------------------------------------------------------------------------------------------------------------------------------------------------------------------------------|------------------------------------------------------------------------|--------------------------------------------------------|------------------------------------------------------------------------------------------------------------------------------------------------------------------------------------|
|                              |                                              | management and discharge criteria resulted in insecurity of the PACU physicians, nursing staff stress and delayed admission of patients from theatre. Evidence suggests that significant post-operative complications can be detected and successfully treated in well-organised PACUs, resulting in increased survival [6-9]. | 5 who have undergone minor or major surgery, or developed post-op complications. Formal handover to PACU anaesthetist. Standardised investigations and treatment guidelines for early post-operative complications. Intervention delivered face-to-face in PACU. No co-interventions identified                                                                                                                              | there is evidence of a complication).<br><br>Slow-track programme: care provided by the PACU anaesthetist with the help of nursing staff<br><br>Pre-existing skills required: PACU specialist nursing staff (overnight nurse also ICU qualified). No specific training for either nursing staff or medical staff is detailed in the study. | Aldrete score is $\geq 8$ and the verbal numeric rating scale is $\leq 3$<br><br>Slow-track programme: care provided immediately post-operatively. Discharge based on Aldrete score $\geq 8$ and normal blood gas analysis. PACU physician in charge decides on discharge |                                                                        |                                                        | medical head of the PACU, and during weekly quality control, feedback and information meetings.                                                                                    |
| Fraser and Nair 2016         | Opening of an extended recovery unit         | Was felt that some patients admitted to critical care post-operatively only required short term monitoring and optimisation [10]. Unnecessary admissions of patients to critical care increases bed occupancy in the unit, and was contributing to significant numbers of OT cancellations.                                    | Extended Recovery Unit was opened in Oct 2014. Patients booked into the unit in advance. 4-6 hour stay. Standard form was completed by nursing staff for every patient: recording time and place of discharge, complications encountered and medical assistance required. (Recorded how many patients were assessed as safe to return to ward, and how many still required level 2 care)<br><br>Nil co-interventions evident | Anaesthetists provided post-op medical care/ plans in the extended recovery unit. Recovery nursing staff provided care and completed the standard service evaluation form.                                                                                                                                                                 | Patients stayed in the extended recovery unit for 4-6 hours post-op.                                                                                                                                                                                                      | Not tailored                                                           | No                                                     | No mention of steps taken to ensure standardisation of treatment. Standard form provided to nursing staff, but no mention if forms were audited to ensure correct data collection. |
| Kastrup, Seeling et al. 2012 | Introduction of intensivist coverage in PACU | Increasing demand for critical care, which can lead to capacity limitations in the ICU. This causes                                                                                                                                                                                                                            | PACU physician is in charge of allocation of patients to the PACU, ICU and IMCU (intermediate care unit)                                                                                                                                                                                                                                                                                                                     | Staffing of the PACU was changed so that both the nursing and physician staffing are covered by the ICU                                                                                                                                                                                                                                    | Intervention provided immediately post-operatively.                                                                                                                                                                                                                       | Immediate post-operative care tailored to each patient by the treating | No apparent modification to the intervention were made | There is no mention of fidelity assessment. As intervention was a change in staffing                                                                                               |

|                                                                                                                                                          |                                       |                                                                                                                                                                                                             |                                                                                                                                                                                                                                                                                                                                                                                                                                                                                                                                                                                                                                                                                                           |                                                                                                                                                                                                                                      |                                                                                                                                               |                                                                                                                                                                                               |                                                                           |                                                                                                                                                                                                                                                                                                                                                                                              |
|----------------------------------------------------------------------------------------------------------------------------------------------------------|---------------------------------------|-------------------------------------------------------------------------------------------------------------------------------------------------------------------------------------------------------------|-----------------------------------------------------------------------------------------------------------------------------------------------------------------------------------------------------------------------------------------------------------------------------------------------------------------------------------------------------------------------------------------------------------------------------------------------------------------------------------------------------------------------------------------------------------------------------------------------------------------------------------------------------------------------------------------------------------|--------------------------------------------------------------------------------------------------------------------------------------------------------------------------------------------------------------------------------------|-----------------------------------------------------------------------------------------------------------------------------------------------|-----------------------------------------------------------------------------------------------------------------------------------------------------------------------------------------------|---------------------------------------------------------------------------|----------------------------------------------------------------------------------------------------------------------------------------------------------------------------------------------------------------------------------------------------------------------------------------------------------------------------------------------------------------------------------------------|
| 1<br>2<br>3<br>4<br>5<br>6<br>7<br>8<br>9<br>10<br>11<br>12<br>13<br>14<br>15<br>16<br>17                                                                |                                       | delay in admissions of patients from ED, cancellation of surgery [11, 12], early discharge from ICU [11, 13-15], initiation of treatment in ED or on a standard ward and inter-hospital transfers [12, 16]. | in collaboration with the surgeons. If no intensive care bed available, patients can be treated in the PACU for up to 24 hours (independent of the degree of organ failure) There are 6 beds with complete intensive care monitoring and respiratory care possibilities available.<br><br>Face to face delivery of intervention<br><br>No co intervention evident or discussed                                                                                                                                                                                                                                                                                                                            | team. The physician staffing was changed to a 24hr in-house critical care physician and nurse presence for the PACU. 1:3 nurse, patient ratio. 1 physician for all PACU patients.                                                    | Patients can be immediately admitted to the PACU around the clock (without any delays).                                                       | anaesthetist and surgeon.                                                                                                                                                                     | during the study period.                                                  | model, this would have been monitored by the anaesthetist/ICU physician in charge.                                                                                                                                                                                                                                                                                                           |
| 18<br>19<br>20<br>21<br>22<br>23<br>24<br>25<br>26<br>27<br>28<br>29<br>30<br>31<br>32<br>33<br>34<br>35<br>36<br>37<br>38<br>39<br>40<br>41<br>42<br>43 | Schweizer, Khatchatourian et al. 2002 | Opening of a new PACU (post-anaesthesia care unit)                                                                                                                                                          | Utilisation of the ICU for routine post-op care is commonplace, however ICUs account for an increasing proportion of a hospitals budget [17-19].<br><br>PACU moved to an area closer to theatres and the ICU, and was expended with additional beds to provide overnight care following major, non-cardiac surgery.<br><br>Standardised rounding (morning and evening), with review of patient's clinical status, laboratory results and chest radiographs.<br><br>Co-interventions: Preoperative risk assessment guidelines of the American Heart association and the American College of Cardiology (AHA/ACC) were introduced, and antiadrenergic medications (beta-blockers and alpha-2-agonists) were | New PACU staffed with anaesthesia-trained nurses (1:3 ratio), post-operative care coordinated by cardiothoracic surgical and anaesthesia teams, 24-hour medical coverage provided by one PACU resident (supervised by an attending). | New PACU provided 24-hour medical coverage. Patients were admitted immediately post-operatively. (Time limit on PACU admission not specified) | Post-operative care standardised as much as possible, but ongoing care tailored to each patient based on pre-existing medical comorbidities, intra-operative events and post-op complications | Intervention does not appear to have been altered during the study period | Variations in medical practice were minimised using standard protocols for blood test analysis, CXR orders, antibiotic prophylaxis, pain control, fluid administration, respiratory therapy, nutrition and mobilisation.<br><br>All surgical procedures and approach standardised as much as possible. General anaesthesia standardised. Post-operative analgesia regimen also standardised. |

|                                     |                                                              |                                                                                                                                                                                                                                                                                                                                                                                                                          |                                                                                                                                                                                                                                                                                                                                                                                                                                                                                                                                                                                                                                                                                                                                                                                                              |                                                                                                                                                                                                                                                                                                                                                                                     |                                                                                                                                                                                                                                                                                                                                                                                 |                                                           |                                                                                   |                                                                                                                                                                                                                                                                           |
|-------------------------------------|--------------------------------------------------------------|--------------------------------------------------------------------------------------------------------------------------------------------------------------------------------------------------------------------------------------------------------------------------------------------------------------------------------------------------------------------------------------------------------------------------|--------------------------------------------------------------------------------------------------------------------------------------------------------------------------------------------------------------------------------------------------------------------------------------------------------------------------------------------------------------------------------------------------------------------------------------------------------------------------------------------------------------------------------------------------------------------------------------------------------------------------------------------------------------------------------------------------------------------------------------------------------------------------------------------------------------|-------------------------------------------------------------------------------------------------------------------------------------------------------------------------------------------------------------------------------------------------------------------------------------------------------------------------------------------------------------------------------------|---------------------------------------------------------------------------------------------------------------------------------------------------------------------------------------------------------------------------------------------------------------------------------------------------------------------------------------------------------------------------------|-----------------------------------------------------------|-----------------------------------------------------------------------------------|---------------------------------------------------------------------------------------------------------------------------------------------------------------------------------------------------------------------------------------------------------------------------|
|                                     |                                                              |                                                                                                                                                                                                                                                                                                                                                                                                                          | <p>increasingly administered peri operatively</p>                                                                                                                                                                                                                                                                                                                                                                                                                                                                                                                                                                                                                                                                                                                                                            |                                                                                                                                                                                                                                                                                                                                                                                     |                                                                                                                                                                                                                                                                                                                                                                                 |                                                           |                                                                                   |                                                                                                                                                                                                                                                                           |
| <p>Street, Phillips et al. 2017</p> | <p>Implementation of a Post Anaesthesia Care Tool (PACT)</p> | <p>Current post-operative death rate of 0.4-4%, and major complication rate of 3-17%. 40% of in-hospital complications are associated with surgery [20, 21]. Hospital costs for surgical patients experiencing a complication are significantly higher than for patients without complications [22-24]. Intensive observation of patients in PACU by nurses can help with the early detection of complications [25].</p> | <p>Implementation of the tool was supported by peri-operative nursing educators. Materials included posters summarising how to complete the PACT, and feedback sessions between the nurses using the tool and the perioperative team. PACT was included in the revised 'Post-anaesthetics care record'</p> <p>Working party was established to develop the tool. Extensive review of the current processes at each of the hospitals was done. Researchers conducted a systematic review and an expert consensus statement to evaluate the current evidence. PACT tool developed in line with the National Consensus Statement on the essential elements for recognising and responding to clinical deterioration.</p> <p>Face to face delivery of the intervention.</p> <p>No co-interventions apparent.</p> | <p>Perioperative nurse educators trained recovery nurses in the use of the tool. Feedback sessions during the training period were attended by the perioperative team including, educators, nurse unit managers and the quality unit of the organisation. Recovery nursing staff used the PACT in recovery. Medical staff responded to concerns that were triggered by the PACT</p> | <p>PACT used immediately post-operatively, until patient was safe for discharge to the ward (of home for day surgery patients).</p> <p>Patient readiness for discharge from PACU was recorded by a checklist of criteria: last 2 sets of observations were not within the MET criteria, no active vomiting, pain management ordered and all surgical concerns had been met.</p> | <p>Intervention does not appear to be tailored.</p>       | <p>No modifications appear to have been made once the study period commenced.</p> | <p>Feedback sessions during the training period were attended by the perioperative team including, educators, nurse unit managers and the quality unit of the organisation. However, there is no mention of fidelity assessment or auditing once the tool was in use.</p> |
| <p>Tayrose, Newman et al. 2013</p>  | <p>Rapid rehab patients started as part of a pilot</p>       | <p>Previous studies have shown that early mobilisation after</p>                                                                                                                                                                                                                                                                                                                                                         | <p>Therapy program was the same for each group: therapist would</p>                                                                                                                                                                                                                                                                                                                                                                                                                                                                                                                                                                                                                                                                                                                                          | <p>Physiotherapists delivered the intervention</p>                                                                                                                                                                                                                                                                                                                                  | <p>Therapy commenced in the</p>                                                                                                                                                                                                                                                                                                                                                 | <p>Intervention was tailored to the speed of recovery</p> | <p>No adaptations or modifications appear to have</p>                             | <p>No assessment of fidelity reported. Unclear how the</p>                                                                                                                                                                                                                |

1  
2  
3  
4  
5  
6  
7  
8  
9  
10  
11  
12  
13  
14  
15  
16  
17  
18  
19  
20  
21  
22  
23  
24  
25  
26  
27  
28  
29  
30  
31  
32  
33  
34  
35  
36  
37  
38  
39  
40  
41  
42  
43  
44  
45  
46

|                                   |                                                                                        |                                                                                                                                                                                                                                                                                                                                                                                                             |                                                                                                                                                                                                                                                                                                                                                                                                                                                          |                                                                                                                                                                                                                                                          |                                                                                                                   |                                                                                                                                                                                                                        |                                                   |                                                                                                                                                                                                                                                                                                                                                                |
|-----------------------------------|----------------------------------------------------------------------------------------|-------------------------------------------------------------------------------------------------------------------------------------------------------------------------------------------------------------------------------------------------------------------------------------------------------------------------------------------------------------------------------------------------------------|----------------------------------------------------------------------------------------------------------------------------------------------------------------------------------------------------------------------------------------------------------------------------------------------------------------------------------------------------------------------------------------------------------------------------------------------------------|----------------------------------------------------------------------------------------------------------------------------------------------------------------------------------------------------------------------------------------------------------|-------------------------------------------------------------------------------------------------------------------|------------------------------------------------------------------------------------------------------------------------------------------------------------------------------------------------------------------------|---------------------------------------------------|----------------------------------------------------------------------------------------------------------------------------------------------------------------------------------------------------------------------------------------------------------------------------------------------------------------------------------------------------------------|
|                                   | <p>program where the first 2 cases of the day were mobilised in the recovery room.</p> | <p>total joint replacement enhances post-op recovery and promotes faster rehabilitation [26, 27]. Previous studies have also demonstrated early mobilisation leads to a decreased LOS, improve patient outcomes, and demonstrate cost savings [28-30]. However, it's unclear if early mobilisation that starts in the recovery room will lead to a reduction in LOS while maintaining patient outcomes.</p> | <p>start with having patients hang their legs over the side of the bed. Therapy would then progress with transferring to a chair, ambulation, and climbing stairs. The expectation for a patient was to ambulate 100 feet or greater, and climb 6 stairs, prior to discharge.</p> <p>Face to face delivery of intervention by physiotherapists</p> <p>No co-interventions described</p>                                                                  | <p>Standard rehabilitation program implemented. Reliance of physiotherapists pre-existing skills and training.</p>                                                                                                                                       | <p>recovery room on the day of surgery</p>                                                                        | <p>of each patient. If a patient was unfit to mobilise on the day of surgery in PACU (as per the anaesthetist, surgeon or ICU doctor), they were not mobilised despite being one of the first 2 cases for the day.</p> | <p>occurred during the study.</p>                 | <p>standardisation of the rehabilitation program was ensured.</p>                                                                                                                                                                                                                                                                                              |
| <p>Zoremba, Dette et al. 2009</p> | <p>Patients performed incentive spirometry in the PACU</p>                             | <p>Even several days after surgery, obese patients exhibit a measurable amount of atelectasis, predisposing them to post-op pulmonary complications [31-35].</p>                                                                                                                                                                                                                                            | <p>Physiotherapist supervised the respiratory physiotherapy treatment at all times. Exercises were started approximately 15 minutes after extubation, and the patients were encouraged to perform 15 deep breaths (incentive spirometry) every 10-15 minutes within the first 2 hours after surgery. If needed, patients were asked to cough during the pause to mobilise secretions. All therapy was performed in the sitting position if possible.</p> | <p>Physiotherapists supervised the respiratory physiotherapy treatment at all times</p> <p>Pre-existing skills required to deliver the intervention. No mention of specific training provided to the physiotherapists apart from the study protocol.</p> | <p>Intervention was delivered commencing 15 minutes post-operatively, continuing until 2 hours after surgery.</p> | <p>Intervention does not appear to have been tailored</p>                                                                                                                                                              | <p>No change to intervention during the study</p> | <p>Spirometry was standardised as much as possible. At each assessment time, spirometry was performed at least 3 times, and the best measurement was recorded (in line with the criteria of the European Respiratory Society). Factors that interfered with breathing (eg pain, shivering) were eliminated, or minimised to produce reliable measurements)</p> |

1  
2  
3  
4  
5  
6  
7  
8  
9  
10  
11  
12  
13  
14  
15  
16  
17  
18  
19  
20  
21  
22  
23  
24  
25  
26  
27  
28  
29  
30  
31  
32  
33  
34  
35  
36  
37  
38  
39  
40  
41  
42  
43  
44  
45  
46

No co-interventions described

#### Outcomes and comparison groups additional table:

| Source                           | Primary outcomes                                             | Method of assessing primary outcome measure                                                                                                                                                                                                                        | Timing of primary outcome assessment                                                                              | Adverse events                                         | Secondary outcomes                                              | Method of assessing secondary outcome measure                                                                                       | Timing of secondary outcome measure                     |
|----------------------------------|--------------------------------------------------------------|--------------------------------------------------------------------------------------------------------------------------------------------------------------------------------------------------------------------------------------------------------------------|-------------------------------------------------------------------------------------------------------------------|--------------------------------------------------------|-----------------------------------------------------------------|-------------------------------------------------------------------------------------------------------------------------------------|---------------------------------------------------------|
| Callaghan, Lynch et al. 2005     | In hospital mortality                                        | Patients who had surgery were identified using a combination of computerized theatre records, surgeon's logbooks, and theatre booking diaries. Case notes analysed retrospectively. POSSUM variables collected prospectively (during the pre-operative assessment) | Retrospective analysis<br>No follow-up required                                                                   | OIR group: Admission to ICU within 48 hours of surgery | Operative characteristics. Common post-operative complications. | Case notes analysed retrospectively. Only complications occurring on more than four occasions during the study period are included. | Retrospective analysis of notes. No follow-up required. |
|                                  | In hospital morbidity                                        |                                                                                                                                                                                                                                                                    |                                                                                                                   |                                                        |                                                                 |                                                                                                                                     |                                                         |
|                                  | Mean postoperative stay, days                                |                                                                                                                                                                                                                                                                    |                                                                                                                   |                                                        |                                                                 |                                                                                                                                     |                                                         |
|                                  | Median POSSUM operative severity score                       |                                                                                                                                                                                                                                                                    |                                                                                                                   |                                                        |                                                                 |                                                                                                                                     |                                                         |
| Eichenberger, Haller et al. 2011 | PACU length of stay                                          | Anaesthetic Information system (computerize patient information system. PACU data entered by PACU nurses and PACU secretary)                                                                                                                                       | Data entered in real time in PACU. Data reviewed retrospectively by investigators.                                | Nil reported                                           | Nil reported                                                    | NA                                                                                                                                  | NA                                                      |
|                                  | In-hospital mortality                                        | The hospital administrative database (administrative information used for financial purposes). Cause of death extracted from patient discharge reports, and entered into the administrative database by professional coders.                                       | Data entered throughout the post-operative period until discharge. Data reviewed retrospectively by investigators |                                                        |                                                                 |                                                                                                                                     |                                                         |
|                                  | Unplanned ICU admissions after PACU stay                     | The hospital administrative database. Reason for unplanned ICU admission extracted from patient discharge report and entered into database by professional coders.                                                                                                 | Data entered throughout the post-operative period. Reason for ICU admission entered after patient discharge.      |                                                        |                                                                 |                                                                                                                                     |                                                         |
| Fraser and Nair 2016             | Discharge destination after extended recovery unit admission | Standard form completed by nursing staff in extended recovery, documenting time and place of discharge, complications encountered and medical assistance required.                                                                                                 | Assessment made at time of extended recovery discharge. No follow-up done.                                        | Nil reported                                           | Nil reported                                                    | NA                                                                                                                                  | NA                                                      |

|                                                                                                                                                                                                                                              |                                                                                                                                                                                                                                                                                                                                                                                                                                                                   |                                                                                                                                                                                                                                                                                                                                                                                                                                                                                                                                                                                                                                                  |                                                                                                                                                |                     |                                                                                                                                                                                                                                                                                                                        |                                                                                                                                                                                                                                                                                                                  |                                                                                                                                   |
|----------------------------------------------------------------------------------------------------------------------------------------------------------------------------------------------------------------------------------------------|-------------------------------------------------------------------------------------------------------------------------------------------------------------------------------------------------------------------------------------------------------------------------------------------------------------------------------------------------------------------------------------------------------------------------------------------------------------------|--------------------------------------------------------------------------------------------------------------------------------------------------------------------------------------------------------------------------------------------------------------------------------------------------------------------------------------------------------------------------------------------------------------------------------------------------------------------------------------------------------------------------------------------------------------------------------------------------------------------------------------------------|------------------------------------------------------------------------------------------------------------------------------------------------|---------------------|------------------------------------------------------------------------------------------------------------------------------------------------------------------------------------------------------------------------------------------------------------------------------------------------------------------------|------------------------------------------------------------------------------------------------------------------------------------------------------------------------------------------------------------------------------------------------------------------------------------------------------------------|-----------------------------------------------------------------------------------------------------------------------------------|
| <p>1<br/>2<br/>3<br/>4<br/>5<br/>6<br/>7<br/>8<br/>9<br/>10<br/>11<br/>12<br/>13<br/>14<br/>15</p> <p>Kastrup, Seeling et al. 2012</p>                                                                                                       | <p>LOS in PACU (days)</p> <p>LOS in ICU (all types of ICU's)(days)</p> <p>Pre operative days (all patients)</p> <p>Pre operative day (PACU-patients)</p> <p>Pre operative day (ICU-patients)</p> <p>Days on normal ward</p> <p>LOS hospital (days)</p> <p>CMI (case mix index) normal ward</p> <p>CM ICU</p> <p>CW (cost weight) per hospital stay (overall)</p>                                                                                                  | <p>Data collected from the hospital administration system. All clinically relevant data are documented in a patient data management system (PDMS) and can be extracted for evaluations. Every patient admitted to the ICU in included in the system (COPRA-System® GmbH, Sasbachwalden, Germany). 24-hours after patient discharge, the record is changed to a read-only version so that no modifications can be made.</p>                                                                                                                                                                                                                       | <p>Retrospective analysis of data. Data continuously collected until patient discharge. No follow-up post-discharge.</p>                       | <p>Nil reported</p> | <p>General descriptive variables for the ICU, before and after the introduction of the PACU (ICU patients only).</p>                                                                                                                                                                                                   | <p>Data extracted from patient data management system (PDMS). DRG system allows for coding of the intensive care as DRG procedure, making the severity of disease relevant for reimbursement. The “Complex intensive care treatment” is based on several scores, which are collected within the PDMS system.</p> | <p>Retrospective analysis of data. Data continuously collected until patient discharge. No follow-up post-discharge.</p>          |
| <p>16<br/>17<br/>18<br/>19<br/>20<br/>21<br/>22<br/>23<br/>24<br/>25<br/>26<br/>27<br/>28<br/>29<br/>30<br/>31<br/>32<br/>33<br/>34<br/>35<br/>36<br/>37<br/>38<br/>39<br/>40<br/>41<br/>42</p> <p>Schweizer, Khatchatourian et al. 2002</p> | <p>Mortality</p> <p>Re-operation</p> <p>Secondary admission to ICU (either from PACU or from the ward)</p> <p>Cardiac complications</p> <ul style="list-style-type: none"> <li>• Myocardial infarct</li> <li>• Arrhythmias</li> <li>• Pulmonary oedema</li> </ul> <p>Respiratory complications</p> <ul style="list-style-type: none"> <li>• Atelectasis</li> <li>• Bronchopneumonia</li> </ul> <p>Mechanical ventilation &gt;6 hours</p> <p>Renal dysfunction</p> | <p>Data prospectively collected on standardized worksheets describing the pre-operative, intraoperative and postoperative periods. One investigator also reviewed all nursing charts, medical records and hospital discharge letters.</p> <p>Data abstracted from two institutional databases</p> <p>Data obtained from the hospital computer</p> <p>Data were prospectively collected on standardized worksheets describing the pre-operative, intraoperative and postoperative periods. One investigator also reviewed all nursing charts, medical records and hospital discharge letters.</p> <p>As above</p> <p>As above</p> <p>As above</p> | <p>Outcome assessments done during inpatient stay, and on review of the hospital data base. No follow-up required after hospital discharge</p> | <p>Nil reported</p> | <p>Identification of independent risk factors for mortality and major complications following thoracic surgery</p> <p>Identification of independent risk factors for mortality and major complications following major vascular surgery</p> <p>Evaluation of perioperative antiadrenergic treatment administration</p> | <p>Data abstracted from two institutional databases</p>                                                                                                                                                                                                                                                          | <p>Patient risk factors reported pre-operatively and intraoperatively (prospective data collection). Analysed at a later date</p> |



|                              |                                                           |                                                                                                                                                                                                                                                                                                                                                                                                                                                                          |                                                                                        |              |                                                           |                                                                                                                                                                                                                                                                                                                                                                                                                                                       |                                                                                      |
|------------------------------|-----------------------------------------------------------|--------------------------------------------------------------------------------------------------------------------------------------------------------------------------------------------------------------------------------------------------------------------------------------------------------------------------------------------------------------------------------------------------------------------------------------------------------------------------|----------------------------------------------------------------------------------------|--------------|-----------------------------------------------------------|-------------------------------------------------------------------------------------------------------------------------------------------------------------------------------------------------------------------------------------------------------------------------------------------------------------------------------------------------------------------------------------------------------------------------------------------------------|--------------------------------------------------------------------------------------|
|                              | Hospital length of stay                                   | Data obtained from the hospital computer                                                                                                                                                                                                                                                                                                                                                                                                                                 |                                                                                        |              |                                                           |                                                                                                                                                                                                                                                                                                                                                                                                                                                       |                                                                                      |
| Street, Phillips et al. 2017 | Nursing management of patient symptoms                    | Data collected by research nurses from the medical record following patient discharge. Severity of each adverse event was graded using the Common Terminology Criteria for Adverse Events (V.4.03) and grouped into mild (no or minimal effect to the patient and resolved spontaneously), moderate (event with resolved after intervention, with no lasting effect for the patient) and severe (required intervention and caused harm to the patient, including death). | Data reviewed from case notes on patient discharge. No longer term follow-up required. | Nil reported | Health service usage and healthcare costs                 | Economic evaluation done from organization data that were routinely submitted to the regional health department for benchmarking. Healthcare costs for each patient admitted to hospital are calculated on a cost-weight analysis using the Australian Refined Diagnostic-Related Groups (AR-DRGs). The AR-DRG was used to calculate the costs for all initial admissions and unplanned readmission, using the nations efficient price determination. | Data reviewed from case notes on patient discharge. No long term follow-up required. |
|                              | Rates of adverse events                                   |                                                                                                                                                                                                                                                                                                                                                                                                                                                                          |                                                                                        |              |                                                           |                                                                                                                                                                                                                                                                                                                                                                                                                                                       |                                                                                      |
|                              | Mortality                                                 |                                                                                                                                                                                                                                                                                                                                                                                                                                                                          |                                                                                        |              |                                                           |                                                                                                                                                                                                                                                                                                                                                                                                                                                       |                                                                                      |
|                              | Length of stay in PACU                                    |                                                                                                                                                                                                                                                                                                                                                                                                                                                                          |                                                                                        |              |                                                           |                                                                                                                                                                                                                                                                                                                                                                                                                                                       |                                                                                      |
|                              | Length of hospital admission                              |                                                                                                                                                                                                                                                                                                                                                                                                                                                                          |                                                                                        |              |                                                           |                                                                                                                                                                                                                                                                                                                                                                                                                                                       |                                                                                      |
|                              | Discharge destination                                     |                                                                                                                                                                                                                                                                                                                                                                                                                                                                          |                                                                                        |              |                                                           |                                                                                                                                                                                                                                                                                                                                                                                                                                                       |                                                                                      |
| Tayrose, Newman et al. 2013  | Overall hospital length of stay                           | Retrospective review of cases, however it is not stated how this was done (case note reviews versus use of the hospital's database)                                                                                                                                                                                                                                                                                                                                      | At time of discharge                                                                   | Nil reported | Percentage completion of the rapid rehabilitation program | Progression of rehab was followed, however methods for assessing this were not stated.                                                                                                                                                                                                                                                                                                                                                                | Followed as an inpatient until the time of discharge.                                |
|                              | Hip arthroplasty subgroup length of stay                  |                                                                                                                                                                                                                                                                                                                                                                                                                                                                          |                                                                                        |              |                                                           |                                                                                                                                                                                                                                                                                                                                                                                                                                                       |                                                                                      |
|                              | Knee arthroplasty subgroup length of stay                 |                                                                                                                                                                                                                                                                                                                                                                                                                                                                          |                                                                                        |              |                                                           |                                                                                                                                                                                                                                                                                                                                                                                                                                                       |                                                                                      |
| Zoremba, Dette et al. 2009   | Pulse oximetry at 1hr, 2hr, 6hr and 24hr post-operatively | Assessed face to face by an investigator. The investigators were blinded.                                                                                                                                                                                                                                                                                                                                                                                                | At 1hr, 2hr, 6hr and 24hr respectively                                                 | Nil reported | Nil reported                                              | NA                                                                                                                                                                                                                                                                                                                                                                                                                                                    | NA                                                                                   |
|                              | Spirometry at 1hr, 2hr, 6hr and 24hr post-operatively     |                                                                                                                                                                                                                                                                                                                                                                                                                                                                          |                                                                                        |              |                                                           |                                                                                                                                                                                                                                                                                                                                                                                                                                                       |                                                                                      |

- Cohen, J., et al., *The Safety of Immediate Extubation After Abdominal Aortic Surgery: A Prospective, Randomised Control Trial*. *Anaesth Analg*, 2001. **93**: p. 1546-1549.
- Bertges, D., et al., *Is Routine Use of the Intensive Care Unit After Elective Infrarenal Aortic Aneurysm Repair Necessary?* *J Vasc Surg*, 2000(32): p. 634-642.
- Podore, P.C. and E.B. Throop, *Infrarenal aortic surgery with a 3-day hospital stay: A report on success with a clinical pathway*. *J Vasc Surg*, 1999. **29**(5): p. 787-92.
- Khuri, S.F., et al., *Determinants of long-term survival after major surgery and the adverse effect of postoperative complications*. *Ann Surg*, 2005. **242**(3): p. 326-41; discussion 341-3.
- Manku, K. and J.M. Leung, *Prognostic significance of postoperative in-hospital complications in elderly patients. II. Long-term quality of life*. *Anesth Analg*, 2003. **96**(2): p. 590-4, table of contents.
- Brown, I., et al., *Use of postanesthesia discharge criteria to reduce discharge delays for inpatients in the postanesthesia care unit*. *J Clin Anesth*, 2008. **20**(3): p. 175-9.
- Thompson, J.S., et al., *Temporal patterns of postoperative complications*. *Arch Surg*, 2003. **138**(6): p. 596-602; discussion 602-3.
- Vlayen, A., et al., *Incidence and preventability of adverse events requiring intensive care admission: a systematic review*. *J Eval Clin Pract*, 2012. **18**(2): p. 485-97.
- Weissman, C. and N. Klein, *The importance of differentiating between elective and emergency postoperative critical care patients*. *J Crit Care*, 2008. **23**(3): p. 308-16.
- Montpellier, D., E. Hayek, and M. Ossart, *[Objectives of consultation in anesthesia]*. *Phlebologie*, 1989. **42**(1): p. 7-18; discussion 18-20.



11. Chalfin, D.B., et al., *Impact of delayed transfer of critically ill patients from the emergency department to the intensive care unit*. Crit Care Med, 2007. **35**(6): p. 1477-83.
12. Duke, G.J., *Metropolitan audit of appropriate referrals refused admission to intensive care*. Anaesth Intensive Care, 2004. **32**(5): p. 702-6.
13. Campbell, A.J., et al., *Predicting death and readmission after intensive care discharge*. Br J Anaesth, 2008. **100**(5): p. 656-62.
14. Hanane, T., et al., *The association between nighttime transfer from the intensive care unit and patient outcome*. Crit Care Med, 2008. **36**(8): p. 2232-7.
15. Priestap, F.A. and C.M. Martin, *Impact of intensive care unit discharge time on patient outcome*. Crit Care Med, 2006. **34**(12): p. 2946-51.
16. Duke, G.J., et al., *Interventions to circumvent intensive care access block: a retrospective 2-year study across metropolitan Melbourne*. Med J Aust, 2009. **190**(7): p. 375-8.
17. Hanson, C.W., 3rd, et al., *Effects of an organized critical care service on outcomes and resource utilization: a cohort study*. Crit Care Med, 1999. **27**(2): p. 270-4.
18. Pollack, M.M., et al., *Improving the outcome and efficiency of intensive care: the impact of an intensivist*. Crit Care Med, 1988. **16**(1): p. 11-7.
19. Singer, M., et al., *The cost of intensive care: a comparison on one unit between 1988 and 1991*. Intensive Care Med, 1994. **20**(8): p. 542-9.
20. Brennan, T.A., et al., *Incidence of adverse events and negligence in hospitalized patients: results of the Harvard Medical Practice Study I. 1991*. Qual Saf Health Care, 2004. **13**(2): p. 145-51; discussion 151-2.
21. Weiser, T.G., et al., *An estimation of the global volume of surgery: a modelling strategy based on available data*. Lancet, 2008. **372**(9633): p. 139-44.
22. Birkmeyer, J.D., et al., *Hospital quality and the cost of inpatient surgery in the United States*. Ann Surg, 2012. **255**(1): p. 1-5.
23. de Vries, E.N., et al., *The incidence and nature of in-hospital adverse events: a systematic review*. Qual Saf Health Care, 2008. **17**(3): p. 216-23.
24. Khan, N.A., et al., *Association of postoperative complications with hospital costs and length of stay in a tertiary care center*. J Gen Intern Med, 2006. **21**(2): p. 177-80.
25. Prowse, M.A. and P.A. Lyne, *Clinical effectiveness in the post-anaesthesia care unit: how nursing knowledge contributes to achieving intended patient outcomes*. J Adv Nurs, 2000. **31**(5): p. 1115-24.
26. Khan, F., et al., *Multidisciplinary rehabilitation programmes following joint replacement at the hip and knee in chronic arthropathy*. Cochrane Database Syst Rev, 2008(2): p. Cd004957.
27. Renkawitz, T., et al., *Comparison of two accelerated clinical pathways--after total knee replacement how fast can we really go?* Clin Rehabil, 2010. **24**(3): p. 230-9.
28. Husted, H., et al., *What determines length of stay after total hip and knee arthroplasty? A nationwide study in Denmark*. Arch Orthop Trauma Surg, 2010. **130**(2): p. 263-8.
29. Minns Lowe, C.J., et al., *Effectiveness of physiotherapy exercise following hip arthroplasty for osteoarthritis: a systematic review of clinical trials*. BMC Musculoskelet Disord, 2009. **10**: p. 98.
30. Schneider, M., et al., *Predictive factors influencing fast track rehabilitation following primary total hip and knee arthroplasty*. Arch Orthop Trauma Surg, 2009. **129**(12): p. 1585-91.
31. Brismar, B., et al., *Pulmonary densities during anesthesia with muscular relaxation--a proposal of atelectasis*. Anesthesiology, 1985. **62**(4): p. 422-8.
32. Hedenstierna, G., *Alveolar collapse and closure of airways: regular effects of anaesthesia*. Clin Physiol Funct Imaging, 2003. **23**(3): p. 123-9.
33. Pelosi, P., et al., *Respiratory system mechanics in sedated, paralyzed, morbidly obese patients*. J Appl Physiol (1985), 1997. **82**(3): p. 811-8.
34. Rothen, H.U., et al., *Airway closure, atelectasis and gas exchange during general anaesthesia*. Br J Anaesth, 1998. **81**(5): p. 681-6.
35. Tokics, L., et al., *Lung collapse and gas exchange during general anesthesia: effects of spontaneous breathing, muscle paralysis, and positive end-expiratory pressure*. Anesthesiology, 1987. **66**(2): p. 157-67.

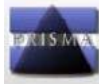

# PRISMA 2009 Checklist

| Section/topic                      | #  | Checklist item                                                                                                                                                                                                                                                                                              | Reported on page # |
|------------------------------------|----|-------------------------------------------------------------------------------------------------------------------------------------------------------------------------------------------------------------------------------------------------------------------------------------------------------------|--------------------|
| <b>TITLE</b>                       |    |                                                                                                                                                                                                                                                                                                             |                    |
| Title                              | 1  | Identify the report as a systematic review, meta-analysis, or both.                                                                                                                                                                                                                                         | 1                  |
| <b>ABSTRACT</b>                    |    |                                                                                                                                                                                                                                                                                                             |                    |
| Structured summary                 | 2  | Provide a structured summary including, as applicable: background; objectives; data sources; study eligibility criteria, participants, and interventions; study appraisal and synthesis methods; results; limitations; conclusions and implications of key findings; systematic review registration number. | 2                  |
| <b>INTRODUCTION</b>                |    |                                                                                                                                                                                                                                                                                                             |                    |
| Rationale                          | 3  | Describe the rationale for the review in the context of what is already known.                                                                                                                                                                                                                              | 3                  |
| Objectives                         | 4  | Provide an explicit statement of questions being addressed with reference to participants, interventions, comparisons, outcomes, and study design (PICOS).                                                                                                                                                  | 4                  |
| <b>METHODS</b>                     |    |                                                                                                                                                                                                                                                                                                             |                    |
| Protocol and registration          | 5  | Indicate if a review protocol exists, if and where it can be accessed (e.g., Web address), and, if available, provide registration information including registration number.                                                                                                                               | 4                  |
| Eligibility criteria               | 6  | Specify study characteristics (e.g., PICOS, length of follow-up) and report characteristics (e.g., years considered, language, publication status) used as criteria for eligibility, giving rationale.                                                                                                      | 4                  |
| Information sources                | 7  | Describe all information sources (e.g., databases with dates of coverage, contact with study authors to identify additional studies) in the search and date last searched.                                                                                                                                  | 4                  |
| Search                             | 8  | Present full electronic search strategy for at least one database, including any limits used, such that it could be repeated.                                                                                                                                                                               | 16                 |
| Study selection                    | 9  | State the process for selecting studies (i.e., screening, eligibility, included in systematic review, and, if applicable, included in the meta-analysis).                                                                                                                                                   | 5                  |
| Data collection process            | 10 | Describe method of data extraction from reports (e.g., piloted forms, independently, in duplicate) and any processes for obtaining and confirming data from investigators.                                                                                                                                  | 5                  |
| Data items                         | 11 | List and define all variables for which data were sought (e.g., PICOS, funding sources) and any assumptions and simplifications made.                                                                                                                                                                       | 5                  |
| Risk of bias in individual studies | 12 | Describe methods used for assessing risk of bias of individual studies (including specification of whether this was done at the study or outcome level), and how this information is to be used in any data synthesis.                                                                                      | 5                  |
| Summary measures                   | 13 | State the principal summary measures (e.g., risk ratio, difference in means).                                                                                                                                                                                                                               | 5                  |
| Synthesis of results               | 14 | Describe the methods of handling data and combining results of studies, if done, including measures of consistency (e.g., $I^2$ ) for each meta-analysis.                                                                                                                                                   | NA                 |

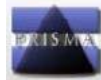

# PRISMA 2009 Checklist

| Section/topic                 | #  | Checklist item                                                                                                                                                                                           | Reported on page # |
|-------------------------------|----|----------------------------------------------------------------------------------------------------------------------------------------------------------------------------------------------------------|--------------------|
| Risk of bias across studies   | 15 | Specify any assessment of risk of bias that may affect the cumulative evidence (e.g., publication bias, selective reporting within studies).                                                             | 6                  |
| Additional analyses           | 16 | Describe methods of additional analyses (e.g., sensitivity or subgroup analyses, meta-regression), if done, indicating which were pre-specified.                                                         | NA                 |
| <b>RESULTS</b>                |    |                                                                                                                                                                                                          |                    |
| Study selection               | 17 | Give numbers of studies screened, assessed for eligibility, and included in the review, with reasons for exclusions at each stage, ideally with a flow diagram.                                          | 6                  |
| Study characteristics         | 18 | For each study, present characteristics for which data were extracted (e.g., study size, PICOS, follow-up period) and provide the citations.                                                             | 7                  |
| Risk of bias within studies   | 19 | Present data on risk of bias of each study and, if available, any outcome level assessment (see item 12).                                                                                                | 9-11               |
| Results of individual studies | 20 | For all outcomes considered (benefits or harms), present, for each study: (a) simple summary data for each intervention group (b) effect estimates and confidence intervals, ideally with a forest plot. | 11-12              |
| Synthesis of results          | 21 | Present results of each meta-analysis done, including confidence intervals and measures of consistency.                                                                                                  | 13                 |
| Risk of bias across studies   | 22 | Present results of any assessment of risk of bias across studies (see Item 15).                                                                                                                          | 13                 |
| Additional analysis           | 23 | Give results of additional analyses, if done (e.g., sensitivity or subgroup analyses, meta-regression [see Item 16]).                                                                                    | NA                 |
| <b>DISCUSSION</b>             |    |                                                                                                                                                                                                          |                    |
| Summary of evidence           | 24 | Summarize the main findings including the strength of evidence for each main outcome; consider their relevance to key groups (e.g., healthcare providers, users, and policy makers).                     | 13                 |
| Limitations                   | 25 | Discuss limitations at study and outcome level (e.g., risk of bias), and at review-level (e.g., incomplete retrieval of identified research, reporting bias).                                            | 14                 |
| Conclusions                   | 26 | Provide a general interpretation of the results in the context of other evidence, and implications for future research.                                                                                  | 14                 |
| <b>FUNDING</b>                |    |                                                                                                                                                                                                          |                    |
| Funding                       | 27 | Describe sources of funding for the systematic review and other support (e.g., supply of data); role of funders for the systematic review.                                                               | 15                 |

From: Moher D, Liberati A, Tetzlaff J, Altman DG, The PRISMA Group (2009). Preferred Reporting Items for Systematic Reviews and Meta-Analyses: The PRISMA Statement. PLoS Med 6(7): e1000097. doi:10.1371/journal.pmed1000097

For more information, visit: [www.prisma-statement.org](http://www.prisma-statement.org).

# BMJ Open

**“What health service initiatives undertaken within operating suite recovery rooms within 48 hours post-operatively have been shown to improve patient outcomes after adult non-cardiac surgery: a systematic review.”**

|                                 |                                                                                                                                                                                                                                                                                                                                                |
|---------------------------------|------------------------------------------------------------------------------------------------------------------------------------------------------------------------------------------------------------------------------------------------------------------------------------------------------------------------------------------------|
| Journal:                        | <i>BMJ Open</i>                                                                                                                                                                                                                                                                                                                                |
| Manuscript ID                   | bmjopen-2018-027262.R1                                                                                                                                                                                                                                                                                                                         |
| Article Type:                   | Original research                                                                                                                                                                                                                                                                                                                              |
| Date Submitted by the Author:   | 30-Jul-2019                                                                                                                                                                                                                                                                                                                                    |
| Complete List of Authors:       | Lloyd, Courtney; University of Adelaide, Faculty of Health and Medical Sciences<br>Ludbrook, Guy; University of Adelaide,<br>Story, David; The University of Melbourne , Perioperative and Pain Medicine Unit, Melbourne Medical School<br>Maddern, Guy; University of Adelaide, Discipline of Surgery, Faculty of Health and Medical Sciences |
| <b>Primary Subject Heading</b>: | Anaesthesia                                                                                                                                                                                                                                                                                                                                    |
| Secondary Subject Heading:      | Health services research, Surgery, Anaesthesia                                                                                                                                                                                                                                                                                                 |
| Keywords:                       | Post-operative care, Post-anaesthetic care, Recovery room, Post-anaesthetic care unit (PACU), ANAESTHETICS                                                                                                                                                                                                                                     |
|                                 |                                                                                                                                                                                                                                                                                                                                                |

SCHOLARONE™  
Manuscripts

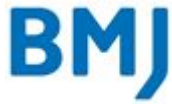

I, the Submitting Author has the right to grant and does grant on behalf of all authors of the Work (as defined in the below author licence), an exclusive licence and/or a non-exclusive licence for contributions from authors who are: i) UK Crown employees; ii) where BMJ has agreed a CC-BY licence shall apply, and/or iii) in accordance with the terms applicable for US Federal Government officers or employees acting as part of their official duties; on a worldwide, perpetual, irrevocable, royalty-free basis to BMJ Publishing Group Ltd ("BMJ") its licensees and where the relevant Journal is co-owned by BMJ to the co-owners of the Journal, to publish the Work in this journal and any other BMJ products and to exploit all rights, as set out in our [licence](#).

The Submitting Author accepts and understands that any supply made under these terms is made by BMJ to the Submitting Author unless you are acting as an employee on behalf of your employer or a postgraduate student of an affiliated institution which is paying any applicable article publishing charge ("APC") for Open Access articles. Where the Submitting Author wishes to make the Work available on an Open Access basis (and intends to pay the relevant APC), the terms of reuse of such Open Access shall be governed by a Creative Commons licence – details of these licences and which [Creative Commons](#) licence will apply to this Work are set out in our licence referred to above.

Other than as permitted in any relevant BMJ Author's Self Archiving Policies, I confirm this Work has not been accepted for publication elsewhere, is not being considered for publication elsewhere and does not duplicate material already published. I confirm all authors consent to publication of this Work and authorise the granting of this licence.

**TITLE PAGE**

“What health service initiatives undertaken within operating suite recovery rooms within 48 hours post-operatively have been shown to improve patient outcomes after adult non-cardiac surgery: a systematic review.”

**Corresponding Author:**

Dr Courtney Lloyd MBBS  
Masters of Clinical Sciences Candidate  
University of Adelaide  
Faculty of Health and Medical Sciences  
AHMS Floor 8  
North Terrace  
Adelaide, South Australia 5000  
Email: courtney.lloyd@sa.gov.au  
Phone: +61 417 876 536

**Other Authors:**

Professor Guy Ludbrook PhD, MBBS, FANZCA  
Professor of Anaesthesia  
University of Adelaide  
Faculty of Health and Medical Sciences  
AHMS Floor 8  
North Terrace  
Adelaide, South Australia 5000  
Email: guy.ludbrook@adelaide.edu.au

Professor David Story MBBS, MD, BMedSci, FANZCA  
Chair of Anaesthesia  
Deputy Director, Centre for Integrated Critical Care  
Head of MCATS  
The University of Melbourne  
Parkville, Victoria 3010  
Email: dastory@unimelb.edu.au

Professor Guy J. Maddern PhD, MS, MD, FRACS, FAHMS  
RP Jepson Professor of Surgery  
University of Adelaide Discipline of Surgery  
Faculty of Health and Medical Sciences  
Clinical Director Surgical Services, Central Adelaide Local Health Network  
The Queen Elizabeth Hospital  
Woodville, South Australia 5011  
Email: guy.maddern@adelaide.edu.au

**Word Count:** 3589

**ABSTRACT**

**Context:** Post-operative recovery rooms have existed since 1847, and the concept of Overnight Intensive Recovery has been successful since the 1990s. However, there is sparse literature investigating the interventions undertaken in recovery, and their impact on patients after recovery room discharge.

**Objective:** This review aimed to investigate any health service initiatives undertaken in post-operative recovery room up to 48 hours post-operatively; and their effect on patient outcomes; including mortality, morbidity, return to theatre, unplanned intensive care unit (ICU) admission and length of hospital stay.

**Data sources:** NCBI PubMed, EMBASE and CINAHL.

**Study selection:** Studies published from 1990 onwards, investigating health service initiatives undertaken in the post-operative recovery room, and their impact on patient outcomes. One author screened titles and abstracts, with two authors completing full text reviews to determine inclusion based on pre-determined criteria. A total of 3288 unique studies were identified, with 14 selected for full text reviews, and 8 included in the review.

**Data extraction:** EndNote 8 (Clarivate Analytics, Boston, USA) was used to manage references and exclude duplicates. One author extracted data from each study using a data extraction form adapted from the Cochrane Data Extraction Template, with all data checked by a second author.

**Data synthesis:** Narrative synthesis of data was the primary outcome measure, with all data of individual studies also presented in the summary results table.

**Conclusions:** Managing selected post-operative patients in a Recovery Room, or PACU, instead of ICU, does not appear to be associated with worse patient outcomes, however due to the high risk of bias within studies, the strength of evidence is moderate at best. Four of eight studies also examined hospital length of stay, and two found the intervention was associated with decreased length of stay and two found no association.

1  
2  
3 Key words: Post-operative care, post-anaesthetic care, recovery room, post-anaesthetic care unit  
4 (PACU)  
5  
6  
7

## 8 **STRENGTHS AND LIMITATIONS OF THIS STUDY**

### 9

- 10 • This is the first systematic review to provide a summary of health service interventions in  
11 recovery and their impact on patient outcomes. It is a current area of interest for many  
12 hospitals/health networks, due to the frequency and cost of post-operative complications.
- 13 • The PRISMA statement was strictly adhered to, with a broad search strategy in an attempt to  
14 capture all relevant publications.
- 15 • The variation in study designs and primary outcome measures meant that we were unable to  
16 combine data for aggregate analysis or meta-analysis.
- 17 • Narrative synthesis of key results may introduce bias; however, steps were taken to minimise  
18 this, including the review of all data by a second author.
- 19  
20  
21  
22  
23  
24  
25

## 26 **INTRODUCTION**

### 27

### 28 **Rationale**

### 29

30 The concept of a post-operative recovery room, or post anaesthesia care unit (PACU), was first  
31 described in 1847 [1], and the progression of surgical and anaesthetic techniques has seen marked  
32 advances in their form and function. However, there is a striking paucity of literature investigating the  
33 interventions undertaken in recovery, and their impact on patients after recovery room discharge. An  
34 editorial by C. Aps in 2004, discussed the concept of Overnight Intensive Recovery; where patients can  
35 be managed in the PACU for up to 24 hours[2], to avoid unnecessary intensive care unit (ICU)  
36 admissions and decrease cancellations due to lack of bed availability. This concept was introduced in  
37 the 1990s at St Thomas' Hospital, London[2]; and despite its apparent success, has not spawned  
38 further research surrounding such a model of care. Swart et al retrospectively examined the impact  
39 of the loss of access to a high dependency unit (HDU) for post-operative management of medium risk  
40 patients, and showed a significant increase in emergency laparotomies and unplanned critical care  
41 admissions[3]. However, the use of HDU for post-operative patients has also been associated with an  
42 increase in post-operative respiratory complications[4]. The concept of extended 6-hour recovery  
43 followed by a monitored ward bed, instead of an elective ICU admission post-operatively, has also  
44 shown to be safe, with no worsening in patient outcomes[5]. This is the first systematic review to  
45 provide a summary of all health service interventions provided in recovery, and their impact on patient  
46 outcomes after recovery room discharge. In presenting these finding, we hope to highlight the need  
47 for further research to help improve the care of patients in the post-operative period.  
48  
49  
50  
51  
52  
53  
54  
55  
56  
57  
58  
59  
60



## Objectives

The objective of this systematic review was to investigate any health service initiatives undertaken in operating suite recovery rooms, in the post-operative period, that have been shown to improve outcomes after PACU discharge, for adult, non-cardiac surgical patients. Important outcomes included mortality, morbidity, return to theatre, unplanned ICU admission and length of hospital stay. Prospective and retrospective randomised control trials, cohort studies, case control studies and comparison studies were included for analysis.

## METHODS

### Protocol and registration

A review protocol was developed in line with the Preferred Reporting of Observational Studies and Meta-Analysis (PRISMA) statement by the author team prior to commencing the systematic review. This protocol is registered on the International Prospective Register of Systematic Reviews (PROSPERO) database, registration number CRD42018106093.

### Patient and Public Involvement

As this is a systematic review of pre-existing literature, patients and the public were not involved in study design. However, this systematic review forms part of a broader research topic on post-operative care, and how to face the challenge of increasing post-operative complication rates. In 2012, the WHO estimated the global volume of surgery to be 312.9 million operations, an increase of 38.2 compared to 2004, resulting in a mean global surgical rate of 4469 operations per 100 000 people per year [6]. With an ageing population and increasing prevalence of comorbidities, post-operative complications are now at pandemic levels [7]. Investigating alternative health care systems and care delivery models is paramount to combatting this issue. It should be a priority of both patients and service providers, as it has the potential to provide great benefit to the broader population.

### Eligibility criteria

Included studies investigated health service initiatives in the PACU, in the post-operative period, up to 48 hours post-operatively. Adult patient groups were the primary focus, however, studies that included a small cohort of children were not automatically excluded. Studies that explored the relationship between interventions in recovery and mortality, morbidity, hospital length of stay, unplanned ICU admission and return to theatre were included. Varying study designs were eligible for inclusion; such as randomised control trials, cohort studies, case control studies and before and after

1  
2  
3 studies. Cross-sectional studies and case reports were excluded. Only studies published from 1990  
4 onwards were included, to focus on up to date clinical practice, and minimise the inclusion of  
5 irrelevant data. Studies published in a language other than English, grey literature and studies  
6 focussing solely on ambulatory surgery were excluded.  
7  
8  
9

### 10 11 **Information sources and search strategy**

12 Medical Subject Headings (MeSH) terms were generated from the NCBI PubMed advanced search area  
13 with the assistance of the University of Adelaide Health Sciences librarian. Logic grids were used as a  
14 tool, to replicate the search throughout the three databases; NCBI PubMed, EMBASE, and Cumulative  
15 Index to Nursing and Allied Health Literature (CINAHL). The full electronic search strategy for the  
16 PubMed database is presented in Appendix 1. This search strategy was utilized across the three  
17 databases from 23/3/18 to 8/4/18 to yield the articles screened for inclusion in the review.  
18  
19  
20  
21  
22  
23

### 24 25 **Study selection**

26 Search results from each data base were recorded, and imported into EndNote 8 (Clarivate Analytics,  
27 Boston, USA). Key word searching was also performed to identify new studies that had not yet been  
28 assigned indexing terms for the databases. Reference lists from key articles were also reviewed to  
29 identify further papers that may have been relevant to the review. Titles and abstracts were screened  
30 by one reviewer (CL), who was not blinded to journal titles or to the study authors or institutions.  
31 Articles selected for full text review were reviewed by two reviewers (CL and GL), and any  
32 discrepancies arising regarding the relevance of a study were resolved by consulting a third party. The  
33 list of references for inclusion was sent to all authors to ensure consensus.  
34  
35  
36  
37  
38  
39  
40

### 41 42 **Data collection process**

43 The Cochrane Data Extraction Template for Included Studies from their consumers and  
44 communication page, was used as a base for our data extraction form. This form was piloted on two  
45 initial studies for usability, with no further modifications required. One reviewer extracted the initial  
46 data from each study (CL), and this data was confirmed by a second reviewer (GL) before inclusion in  
47 the review. One study only included data in pictorial form, and an attempt was made to contact the  
48 authors to obtain the raw data. Unfortunately, this was unsuccessful.  
49  
50  
51  
52  
53  
54

### 55 56 **Data items**

57  
58  
59  
60

1  
2  
3 Data items extracted from each study included patient population and characteristics, intervention  
4 aims and methods, comparison groups and outcome measures. These data items are presented in the  
5 Characteristics of Included Studies Tables.  
6  
7  
8  
9

### 10 **Risk of bias in individual studies**

11 Risk of bias in individual studies was assessed by two reviewers (CL and GL) using Gate-Lite and Robins-  
12 I (previously known as A Cochrane Risk of Bias Assessment Tool: for Non-Randomized Studies of  
13 Interventions (ACROBAT-NRSI)). Narrative synthesis of data placed more weight on higher quality  
14 studies, however, all studies and their results are presented, with caveats to highlight the individual  
15 biases that will affect interpretations of results.  
16  
17  
18  
19  
20  
21

### 22 **Summary measures and planned methods of analysis**

23 Narrative synthesis of data was the principle summary measure. This was due to the differing study  
24 designs and variable outcome measures in each study. Meta-analysis was not appropriate for the data  
25 in this systematic review. All data is presented individually, in relation to each study, with further  
26 narrative synthesis to summarise results. Results from studies were unable to be combined due to the  
27 variation in primary and secondary outcome measures, and differences in study design. No additional  
28 analysis or subgroup analysis was performed during this systematic review.  
29  
30  
31  
32  
33  
34

### 35 **Risk of bias across studies**

36 Risk of bias across studies was assessed by two reviewers (CL and GL), using the Cochrane Risk of Bias  
37 Tool, and discussing any evident publication bias or selective reporting.  
38  
39  
40  
41

## 42 **RESULTS**

### 43 **Study selection**

44 Database results, and numbers of studies screened are presented in the flow diagram (Figure 1). All  
45 references were imported into EndNote 8 for title and abstract screening. One reviewer (CL)  
46 screened all titles and abstracts, with ambiguous studies included for full text review. 14 studies  
47 were selected for full text review. Full text reviews were completed by two reviewers (CL and GL),  
48 and 8 studies were selected for inclusion in the review. A summary of included and excluded studies  
49 was sent to the third and fourth authors for consensus.  
50  
51  
52  
53  
54  
55  
56

### 57 **Study characteristics**

Of the eight studies included, four of the included studies were retrospective cohort studies[8-11], two were observational cohort studies[12, 13], one was a prospective non-randomised pre-post intervention study[14], and one was a prospective randomised cohort study[15]. Study characteristics for each of the included studies are outlined in the Characteristics of Included Studies Summary Table (Table 1). Four studies investigated the use of PACU as a non-ICU pathway for post-operative patients[8, 10, 12, 13]. Two investigated the implementation of physiotherapy in PACU, and the impact on patient outcomes[11, 15]. One evaluated the use of a new nursing scoring tool, and its impact on recognition of patient deterioration in PACU[14], and one evaluated the implementation of a two-track clinical pathway in PACU, and the effect on patient outcomes[9]. All studies focussed primarily on adults, but one included small cohort of children[10]. Common outcome measures included in-hospital mortality, PACU length of stay and hospital length of stay. Further details regarding patient population characteristics, study methodology and outcome measures are also outlined in the supplementary tables published online (supplementary file).

**Table 1. Characteristics of Included Studies Summary Table**

| Source                                     | Aim                                                                                                                                                                               | Study Design                                                    | Number of arms/groups                                                                                                                                                                                                                | Population                                                                                                                            | Intervention                                                                                                                        | Comparison group                                                            | Outcome measures                                                                                      |
|--------------------------------------------|-----------------------------------------------------------------------------------------------------------------------------------------------------------------------------------|-----------------------------------------------------------------|--------------------------------------------------------------------------------------------------------------------------------------------------------------------------------------------------------------------------------------|---------------------------------------------------------------------------------------------------------------------------------------|-------------------------------------------------------------------------------------------------------------------------------------|-----------------------------------------------------------------------------|-------------------------------------------------------------------------------------------------------|
| Callaghan, Lynch et al. 2005 (n= 178)      | To determine the safety of introducing non-ICU pathways for selected patients. And evaluate the effect on cost, ICU beds availability and cancellation rates of elective surgery. | Retrospective cohort study.                                     | Intervention group: patients selected for overnight intensive recovery. Comparison group: patients booked for an elective ICU admission.                                                                                             | All patients undergoing elective open aortic surgery between 1/01/98 and 31/12/02.                                                    | (n= 152)<br><br>Introduction of OIR (Overnight Intensive Recovery)                                                                  | (n= 26)<br><br>Elective post-operative ICU bed                              | In hospital mortality<br>In hospital morbidity<br>Post-operative length of stay<br>ICU length of stay |
| Eichenberger, Haller et al. 2011 (n= 6375) | To assess the impact of a clinical pathway implemented in a post-anaesthesia care unit on post-operative outcomes.                                                                | Retrospective cohort study based on electronic patient records. | Fast track: nurse driven, ASA 1-2. Slow track: physician driven, ASA 3-5 who have undergone minor or major surgery, or developed post-op complications. Comparison group: Pre-existing PACU conditions without the clinical pathway. | All elective and non-elective inpatients, who underwent a surgical or endoscopic procedure under anaesthesia during the study period. | (n= 3345)<br><br>Introduction of a two-track clinical pathway that clearly defined & coordinated medical and nursing interventions. | (n= 3030)<br><br>Pre-existing PACU conditions without the clinical pathway. | PACU length of stay<br>In-hospital mortality<br>Unplanned ICU admissions after PACU stay.             |

1  
2

|                                                                                        |                                                         |                                                                                                                                                                                                                   |                                                         |                                                                                                                                                      |                                                                                                                 |                                                                                                                              |                                                                                                                                 |                                                                                                                                                 |
|----------------------------------------------------------------------------------------|---------------------------------------------------------|-------------------------------------------------------------------------------------------------------------------------------------------------------------------------------------------------------------------|---------------------------------------------------------|------------------------------------------------------------------------------------------------------------------------------------------------------|-----------------------------------------------------------------------------------------------------------------|------------------------------------------------------------------------------------------------------------------------------|---------------------------------------------------------------------------------------------------------------------------------|-------------------------------------------------------------------------------------------------------------------------------------------------|
| 3<br>4<br>5<br>6<br>7<br>8<br>9<br>10<br>11<br>12<br>13                                | Fraser and Nair<br>2016<br>(n= 119)                     | To assess if elective surgical patients were stable enough to return to the general ward after a stay in Extended Recovery instead of being routinely admitted to ICU                                             | Observational cohort study.                             | One arm. No control group                                                                                                                            | Elective surgical patients who would have previously been booked for level 2 care post-operatively.             | (n= 119)<br><br>Opening of an extended recovery unit.                                                                        | Nil                                                                                                                             | Discharge destination after extended recovery unit admission                                                                                    |
| 14<br>15<br>16<br>17<br>18<br>19<br>20<br>21<br>22<br>23<br>24                         | Kastrup,<br>Seeling et al.<br>2012<br>(n= 51090)        | To evaluate the effect of around-the-clock intensivist PACU coverage on the structure of ICU, and to demonstrate the economic effect on the hospital.                                                             | Retrospective cohort study.                             | Intervention group: after the introduction of 24-hour intensivist coverage. Comparison group: prior to introduction of 24-hour intensivist coverage. | All patients undergoing a surgical procedure (adults and children) between 1/01/08 – 30/04/11.                  | (n= 26118)<br><br>Introduction of 24-hour intensivist coverage in PACU                                                       | (n= 24972)<br><br>Pre-existing PACU with no intensivist coverage                                                                | PACU LOS<br>ICU LOS<br>Pre-operative days<br>Hospital LOS<br>Case mix index<br>Cost                                                             |
| 25<br>26<br>27<br>28<br>29<br>30<br>31<br>32<br>33                                     | Schweizer,<br>Khatchatourian<br>et al. 2002<br>(n= 933) | To assess the impact of a new PACU on ICU utilisation, hospital length of stay and complications following major non-cardiac surgery.                                                                             | Observational cohort study.                             | Intervention group: after opening of a new PACU. Control group: before opening of the new PACU                                                       | Adult patients undergoing abdominal aortic reconstruction or resection of lung cancer during the study periods. | (n= 485)<br><br>Opening of a new PACU (post-anaesthesia care unit)                                                           | (n= 448)<br><br>Pre-existing PACU                                                                                               | Mortality<br>Reoperation<br>Secondary admission to ICU<br>Post-operative complications<br>Hospital LOS                                          |
| 34<br>35<br>36<br>37<br>38<br>39<br>40<br>41<br>42<br>43<br>44<br>45<br>46<br>47<br>48 | Street, Phillips<br>et al. 2017<br>(n= 1417)            | To evaluate whether use of a discharge criteria tool for nursing assessment of patients in PACU would enhance nurses' recognition and response to patients at-risk of deterioration and improve patient outcomes. | Prospective non-randomised pre-post intervention study. | Intervention group: after the implementation of the Post-Anaesthetic Care Tool (PACT) Comparison group: prior to the implementation of PACT.         | All adult patients undergoing elective surgery on days of data collection.                                      | (n= 694)<br><br>Implementation of a Post Anaesthesia Care Tool (PACT)                                                        | (n= 723)<br><br>Standard PACU care without PACT                                                                                 | Nursing management of symptoms<br>Rates of adverse events<br>Mortality<br>PACU LOS<br>Hospital LOS<br>Health service usage and healthcare costs |
| 49<br>50<br>51<br>52<br>53<br>54<br>55<br>56<br>57<br>58                               | Tayrose,<br>Newman et al.<br>2013<br>(n= 900)           | To address the impact of rapid rehabilitation beginning in the recovery room on length-of-stay after primary hip and knee arthroplasty.                                                                           | Retrospective cohort study.                             | Intervention group: rapid rehabilitation group. Comparison group: standard rehabilitation protocol                                                   | 900 consecutive hip and knee arthroplasty patients                                                              | (n= 331)<br><br>Rapid rehabilitation pilot program where the first two cases of the day were mobilised in the recovery room. | (n= 569)<br><br>Remainder of cases received standard rehabilitation protocol starting on the morning of post-operative day one. | Overall hospital LOS<br>Hip arthroplasty subgroup LOS<br>Knee arthroplasty subgroup LOS                                                         |

59  
60

1  
2  
3  
4  
5  
6  
7  
8  
9  
10  
11  
12  
13  
14  
15  
16  
17  
18  
19  
20  
21  
22  
23  
24  
25  
26  
27  
28  
29  
30  
31  
32  
33  
34  
35  
36  
37  
38  
39  
40  
41  
42  
43  
44  
45  
46  
47  
48  
49  
50  
51  
52  
53  
54  
55  
56  
57  
58  
59  
60

|                                       |                                                                                                                                                                                          |                                     |                                                                                                                                                                      |                                                                                      |                                                                 |                                                                        |                                                                        |
|---------------------------------------|------------------------------------------------------------------------------------------------------------------------------------------------------------------------------------------|-------------------------------------|----------------------------------------------------------------------------------------------------------------------------------------------------------------------|--------------------------------------------------------------------------------------|-----------------------------------------------------------------|------------------------------------------------------------------------|------------------------------------------------------------------------|
| Zorembo, Dette et al. 2009<br>(n= 60) | To evaluate the impact of short-term respiratory physiotherapy during the PACU stay, on postoperative lung function tests and pulse oximetry values in obese adults after minor surgery. | Prospective randomised cohort study | Intervention group: physical therapy treatment group that performed incentive spirometry in the PACU<br>Control group: patients who did not undergo physical therapy | 60 obese adult patients (BMI 30-40) ASA 2-3, scheduled for minor peripheral surgery. | (n= 30)<br>Patients performed incentive spirometry in the PACU. | (n= 30)<br>Not instructed to do any breathing exercises or spirometry. | Pulse oximetry and spirometry at 1, 2, 6 and 24 hours post-operatively |
|---------------------------------------|------------------------------------------------------------------------------------------------------------------------------------------------------------------------------------------|-------------------------------------|----------------------------------------------------------------------------------------------------------------------------------------------------------------------|--------------------------------------------------------------------------------------|-----------------------------------------------------------------|------------------------------------------------------------------------|------------------------------------------------------------------------|

**Risk of bias within studies**

The overall risk of bias within studies was serious. Critical risk of bias was identified in two studies[11, 12], serious risk of bias in three studies[8, 13, 14], moderate risk of bias in one study[10] and low risk of bias in two studies[9, 15]. Significant patient selection and allocation bias was the most common identified cause[8, 10, 11, 13, 14]; as patients in these studies were not randomly allocated to their post-operative level of care. The most clinically unwell patients were sent to ICU automatically, and only the lower risk patients, as deemed by the treating teams, were allowed a trial of care in the PACU. The relatively small numbers of participants in each study, with the exception of Kastrup et al, also introduces a significant risk of bias; as these studies were not adequately powered to assess critical outcomes such as mortality, and other serious post-operative complications. Articles that were considered as being of serious and critical risk of bias, were still included in the review, due to the sparse literature available. The risk of bias summary table (Table 2) provides further analysis, and comment regarding the risk of bias within individual studies.

**Table 2. Risk of Bias Summary Table**

| Source                       | Bias Due to Confounding | Bias in Selection & Allocation of Participants | Bias in Measurement of Interventions | Bias Due to Departures from Intended Interventions | Bias Due to Missing Data | Bias in Measurement of Outcomes | Bias in Selection of Reported Results | Overall Risk of Bias Judgement | Comments                                                                                                                                                          |
|------------------------------|-------------------------|------------------------------------------------|--------------------------------------|----------------------------------------------------|--------------------------|---------------------------------|---------------------------------------|--------------------------------|-------------------------------------------------------------------------------------------------------------------------------------------------------------------|
| Callaghan, Lynch et al. 2005 | Low                     | Serious                                        | Low                                  | Moderate                                           | Low                      | Moderate                        | Low                                   | Serious                        | Significant selection bias of lower risk patients who were sent to OIR. Used predictive values for mortality (based on POSSUM variables) as a comparison measure. |

1  
2

|                                                                                                                |                                       |          |          |          |          |          |         |          |          |                                                                                                                                                                                                                                                                                      |
|----------------------------------------------------------------------------------------------------------------|---------------------------------------|----------|----------|----------|----------|----------|---------|----------|----------|--------------------------------------------------------------------------------------------------------------------------------------------------------------------------------------------------------------------------------------------------------------------------------------|
| 3<br>4<br>5<br>6<br>7                                                                                          | Eichenberger, Haller et al. 2011      | Low      | Low      | Low      | Low      | Low      | Low     | Low      | Low      | High quality study. No specific concerns from review authors.                                                                                                                                                                                                                        |
| 8<br>9<br>10<br>11<br>12<br>13<br>14<br>15                                                                     | Fraser and Nair 2016                  | Low      | Moderate | Moderate | Moderate | Critical | Serious | Moderate | Critical | Over 25% of data missing. No clear objective stated, no explanation of methodology. Poorly defined selection criteria.                                                                                                                                                               |
| 16<br>17<br>18<br>19<br>20<br>21<br>22<br>23<br>24<br>25<br>26<br>27<br>28<br>29                               | Kastrup, Seeling et al. 2012          | Low      | Serious  | Low      | Moderate | Low      | Low     | Low      | Moderate | Significant selection bias of patients allocated to PACU, intermediate care unit or ICU by intensive care physician. This study also included a population of children (numbers not given).                                                                                          |
| 30<br>31<br>32<br>33<br>34<br>35<br>36<br>37<br>38<br>39<br>40<br>41<br>42<br>43<br>44<br>45<br>46<br>47<br>48 | Schweizer, Khatchatourian et al. 2002 | Critical | Serious  | Low      | Low      | Low      | Low     | Low      | Serious  | Introduction of preoperative risk assessment guidelines (AHA/ACC) with increased antiadrenergic administration pre-operatively confounds results. Significant selection bias, no admission criteria stated for PACU or ICU. Patient allocation was determined by treating clinician. |

49  
50  
51  
52  
53  
54  
55  
56  
57  
58  
59  
60

1  
2

|                                                                                        |                                   |     |          |         |          |     |         |          |          |                                                                                                                                                                                                                                             |
|----------------------------------------------------------------------------------------|-----------------------------------|-----|----------|---------|----------|-----|---------|----------|----------|---------------------------------------------------------------------------------------------------------------------------------------------------------------------------------------------------------------------------------------------|
| 3<br>4<br>5<br>6<br>7<br>8<br>9<br>10<br>11<br>12<br>13<br>14<br>15<br>16<br>17        | Street, Phillips<br>et al. 2017   | Low | Serious  | Low     | Moderate | Low | Serious | Critical | Serious  | Power analysis included all patients (including day surgery) when investigating post-operative outcomes after PACU discharge, giving inaccurate results. Poor objective (with different objectives stated in the abstract and the article). |
| 18<br>19<br>20<br>21<br>22<br>23<br>24<br>25<br>26<br>27<br>28<br>29<br>30<br>31<br>32 | Tayrose,<br>Newman et al.<br>2013 | Low | Critical | Serious | Moderate | Low | Serious | Low      | Critical | Patients who were deemed too unwell to be mobilised in recovery, were included in analysis for the standard recovery group. Operative order bias, by including the first two cases of the day. No methods reported for data collection.     |
| 33<br>34<br>35<br>36<br>37<br>38                                                       | Zoremba,<br>Dette et al.<br>2009  | Low | Low      | Low     | Low      | Low | Low     | Low      | Low      | Good quality study. However, does not address the longer-term outcomes of interest.                                                                                                                                                         |

39  
40  
41  
42  
43  
44  
45  
46  
47  
48  
49  
50  
51  
52  
53  
54  
55  
56  
57  
58  
59  
60

**Results of individual studies**

The results of each individual study are presented in the results of included study table (Table 3). Four studies[8, 10, 12, 13] investigated non-ICU pathways for care of post-operative patients, and these pathways were not associated with increased mortality rates in three of the included studies[8, 10, 13]. However, it must be noted that due to sample size, only one study [10] was adequately powered to show a reliable difference in mortality rates, and one study[12] did not investigate mortality as an outcome measure. Four of eight studies also examined hospital length of stay [8, 10, 11, 13], and two found the intervention was associated with decreased length of stay and two found no association (Table 3). Kastrup et al demonstrated a significant decrease in length of stay for all surgical patients after their introduction of 24-hour intensivist coverage to the PACU [10]. Tayrose et al, also demonstrated a decreased length of stay for patients who received early mobilisation in PACU[11].



However, Callaghan et al and Schweizer et al did not demonstrate any statistically significant decrease in length of stay[8, 13]. PACU length of stay was another common outcome measure in three of the included studies[9, 10, 14]. Eichenberger et al demonstrated a decreased PACU length of stay for ASA 1-2 patients, but no difference for ASA3-5, while Kastrup et al and Street both demonstrated an increase in PACU length of stay following their interventions[10, 14]. Due to the variations in study designs, we were unable to combine the data for further aggregate analysis.

**Table 3. Results of Included Studies**

| Source                                | Intervention                                                                                                       | Mortality                                                                                                                                                                                      | Other Key results                                                                                                                                                                                                                                                                                                                                                                                                                                                                                                                                                                                                                                                                                                                            |
|---------------------------------------|--------------------------------------------------------------------------------------------------------------------|------------------------------------------------------------------------------------------------------------------------------------------------------------------------------------------------|----------------------------------------------------------------------------------------------------------------------------------------------------------------------------------------------------------------------------------------------------------------------------------------------------------------------------------------------------------------------------------------------------------------------------------------------------------------------------------------------------------------------------------------------------------------------------------------------------------------------------------------------------------------------------------------------------------------------------------------------|
| Callaghan, Lynch et al. 2005          | Introduction of OIR (Overnight Intensive Recovery)                                                                 | No significant difference between groups. Overall in hospital mortality was 2%. fewer than predicted patients died (observed mortality 3 versus predicted 95% CI 8-21).                        | Morbidity: No significant difference between groups. Overall, fewer than predicted patients experienced one or more complications (observed 101 versus predicted morbidity 103-125 95%CI)<br>Hospital length of stay: No significant difference between groups                                                                                                                                                                                                                                                                                                                                                                                                                                                                               |
| Eichenberger, Haller et al. 2011      | Introduction of a two-track clinical pathway that clearly defined & coordinated medical and nursing interventions. | Overall in-hospital mortality decreased significantly from 68 patients (1.5%) to 39 patients (0.8%) (P<0.001). In ASA 3-5 patients, mortality was nearly halved (adjusted OR 0.40) (P< 0.001). | Unplanned ICU admission: Total number of unplanned ICU admissions after stay in PACU decreased from 113 (2.5%) to 90 (1.9%) (adjusted OR 0.70) (P=0.70)<br>PACU length of stay: After adjustment for differences in patients and procedures. Statistically significant decrease in PACU length of stay for ASA 1-2 patients (adjusted P< 0.001). There was no difference for ASA 3-5 patients (adjusted P= 0.768)                                                                                                                                                                                                                                                                                                                            |
| Fraser and Nair 2016                  | Opening of an extended recovery unit.                                                                              | Not investigated                                                                                                                                                                               | Discharge destination after extended recovery unit admission: Data from the first 119 patients admitted to the Extended Recovery unit were collected. 76 patients (63.9%) who would have otherwise gone to critical care were able to go back to the ward.                                                                                                                                                                                                                                                                                                                                                                                                                                                                                   |
| Kastrup, Seeling et al. 2012          | Introduction of 24-hour intensivist coverage in PACU                                                               | No difference between groups                                                                                                                                                                   | Hospital length of stay: Overall length of stay decreased significantly for all surgical patients. From 8.3 (+/- 11.8) days to 7.71 (+/- 10.99) days.<br>PACU length of stay: More patients were treated in the PACU for a longer period of time. Mean LOS increased from 0.27 (+/- 0.2) days to 0.45 (+/- 0.41) days<br>Cases treated in ICU: Mean number of cases treated in the ICU per month decreased significantly from 164.7 (+/- 14.37) to 133.8 (+/- 19.42) (P<0.001)<br>ICU treatment days: Mean number of treatment days per month did not change. Relative number of patients with longer LOS (>7 days) increased after introduction of PACU, whereas average number of patients staying <24 hours in the ICU decreased by ~50%. |
| Schweizer, Khatchatourian et al. 2002 | Opening of a new PACU (post-anaesthesia care unit)                                                                 | No difference between study periods                                                                                                                                                            | Morbidity: Vascular patients had decreased rates of myocardial infarction (6.4% vs 1.3% p=0.009) and decreased rates of pulmonary oedema (5.1% vs 1.7% p=0.08)<br>Re-operation: No difference between study periods<br>Hospital length of stay: Total hospital length of stay did not change over time                                                                                                                                                                                                                                                                                                                                                                                                                                       |
| Street, Phillips et al. 2017          | Implementation of a Post Anaesthesia Care Tool (PACT)                                                              | No significant difference between groups.                                                                                                                                                      | Patient management in PACU: More requests for medical review 19% vs 30% (P<0.001), more patients with MET criteria modified by an anaesthetist 6.5% vs 13.8% (P<0.001), higher rates of analgesia administration 37.3% vs 54.2% (P=0.001).<br>Adverse events in PACU: More adverse events recorded in PACU in phase 2, 29.4% vs 21.2% (P<0.001). May represent a greater recognition of adverse events in PACU after implementation of PACT.<br>Adverse events after PACU: Significant decrease in rates of clinical deterioration and significant decrease in cardiovascular events after PACU discharge.<br>PACU length of stay: Increase in median PACU length of stay from 45min in phase 1 to 53min in phase 2 (P<0.001)                |

|                             |                                                                                                              |                  |                                                                                                                                                                                                                                                                                                                                                                                                                                                                                                                                                                                                                                                            |
|-----------------------------|--------------------------------------------------------------------------------------------------------------|------------------|------------------------------------------------------------------------------------------------------------------------------------------------------------------------------------------------------------------------------------------------------------------------------------------------------------------------------------------------------------------------------------------------------------------------------------------------------------------------------------------------------------------------------------------------------------------------------------------------------------------------------------------------------------|
| Tayrose, Newman et al. 2013 | Rapid rehabilitation pilot program where the first two cases of the day were mobilised in the recovery room. | Not investigated | Overall hospital length of stay: Rapid rehabilitation had significantly decreased length of stay that patient who began therapy on post-op day 1 (P<0.001).<br>Hip arthroplasty subgroup length of stay: Decreased length of stay for rapid rehab patients in the hip arthroplasty subgroup (P<0.001).<br>Knee arthroplasty subgroup length of stay: Decreased LOS for rapid rehab patients in the knee arthroplasty subgroup (P=0.16).                                                                                                                                                                                                                    |
| Zoremba, Dette et al. 2009  | Patients performed incentive spirometry in the PACU.                                                         | Not investigated | Pulse oximetry: Significantly improved pulse oximetry values at 1 and 2 hours in PACU, and at 6 hours post mobilisations (P<0.0001), and significant improvement in pulse oximetry values at 24 hours post-op (P<0.0001).<br>Spirometry results: Incentive spirometry group recovered lung function faster in during the PACU stay (P<0.0001). Lung function had almost reached baseline at 6 hours in the incentive spirometry group, however the control group were up to 25% below baseline (P<0.0001). Overall difference in lung function between groups had decreased 24 hours after surgery, but significant differences still remained (P=0.0040). |

### Synthesis of results

The overall quality of studies was poor, with significant selection and allocation bias; however, managing post-operative patients outside of the ICU is not associated with worse patient outcomes, especially in an extended recovery setting. There was no increase in mortality rates identified in three of the studies investigating non-ICU pathways for post-operative patients[8, 10, 13], and the fourth did not investigate mortality as an outcome measure[12]. Use of extended recovery also meant that ward discharge was usual, bypassing the ICU[8, 12]. Kastrup et al showed that the addition of intensivist coverage to PACU was associated with decreased length of hospital stay, and Tayrose et al demonstrated that early mobilisation in PACU was associated with decreased length of hospital stay, but significant pre-selection bias for early mobilisation of arthroplasty patients confounds results[11]. Other changes to the PACU environment, including the opening of a new PACU[13] and introduction of Overnight Intensive Recovery[8] did not appear to have any effect on hospital length of stay. The use of a two-track pathway for nurse-driven and physician-driven PACU management and discharge appears to be beneficial in reducing PACU length of stay, and improving outcomes after discharge from PACU, including a significant decrease in post-operative mortality[9]. However, introduction of a Post Anaesthetic Care Tool, and introduction of 24-hour intensivist coverage in PACU was associated with increased length of stay in PACU[10, 14]. There were no long-term positive effects investigated, or identified, for the use of incentive spirometry in PACU post-operatively [15]. It must be noted that the risk of bias of the included studies confounds results. Critical risk of bias was identified in two studies[11, 12], serious risk of bias in three studies[8, 13, 14], moderate risk of bias in one study[10] and low risk of bias in two studies[9, 15]. Only one of the included studies was adequately powered[10], and reliable conclusions cannot be drawn from single studies with such small datasets.

### Risk of bias across studies and additional analyses

1  
2  
3 Risk of bias across studies for the key common outcome measures of mortality, hospital length of stay  
4 and PACU length of stay was high due to the study designs, with no level I or II evidence available.  
5  
6 There was no additional analysis required for this review.  
7  
8  
9

## 10 **DISCUSSION**

### 11 **Summary of evidence**

12  
13 Of the eight studies included in this systematic review, only one was a prospective randomised cohort  
14 study[15], and one was a prospective non-randomised pre-post intervention study[14]. The rest were  
15 observational and retrospective cohort studies[8-13]. There was no level I or level II evidence available  
16 for inclusion in this review. Common outcome measures identified, included mortality, hospital length  
17 of stay and PACU length of stay. Despite the poor quality of evidence, we found that managing  
18 selected higher risk post-operative patients in the PACU instead of ICU was not associated with worse  
19 outcomes[8, 10, 12, 13], and may be associated with decreased unnecessary ICU admissions, with  
20 potential large cost savings. However, due to study types, small participant numbers, and the  
21 significant selection and allocation bias of patients within these studies, the overall strength of  
22 evidence is only moderate. The addition of intensivist coverage to PACU was associated with decreased  
23 hospital length of stay in one study [10], as was the rapid mobilisation of arthroplasty patients[11].  
24 However, the introduction of overnight intensive recovery and the opening of a new PACU had no  
25 effect on hospital length of stay[8, 13]. The introduction of a two-track clinical pathway appeared to  
26 be associated with a decreased PACU length of stay[9], however the introduction of a Post  
27 Anaesthesia Care Tool and introduction of intensivist coverage was associated with increased PACU  
28 length of stay[10, 14]. Only one of the included studies was adequately powered [10], and we are  
29 unable to draw accurate conclusions from single studies with such small participant numbers. This has  
30 significant implications for future research and health resource allocation. Further studies that  
31 prospectively randomly allocate patients to a treatment arm would be of great value, however, we  
32 acknowledge that due to the risk profile and care requirements of surgical patients, this may not be  
33 possible until further safety is proven.  
34  
35  
36  
37  
38  
39  
40  
41  
42  
43  
44  
45  
46  
47  
48  
49

### 50 **Limitations**

51  
52 The protocol development and search strategy for this review were developed in accordance with the  
53 PRISMA statement. With help from experienced health science research librarians, we attempted to  
54 ensure that all references were captured; however, it is possible that studies were missed. Due to the  
55 variation in study design and primary outcome measures, we were unable to combine data for  
56 aggregate analysis or meta-analysis. The narrative synthesis of key results may introduce bias;  
57  
58  
59  
60

1  
2  
3 however, steps were taken to minimise this, including the review of all data by a second author. The  
4 most significant limitation of this systematic review, was the high risk of bias within the individual  
5 studies included in the review. Selection and allocation bias, missing data, inclusion of inappropriate  
6 patient groups such as day surgery, and lack of fidelity assessment were some of the key flaws within  
7 each study. However, the thorough risk of bias assessment and its implications on reported results  
8 allows readers to interpret the data appropriately.  
9  
10  
11  
12  
13  
14

### 15 **Conclusions**

16 Managing selected post-operative patients in PACU instead of ICU does not appear to be associated  
17 with worse patient outcomes, however due to study design, and the high risk of bias within studies,  
18 the strength of evidence is moderate at best. The addition of intensivist coverage to PACU and early  
19 mobilisation was associated with decreased hospital length of stay. While the use of a two-track  
20 clinical pathway decreased PACU length of stay, however there is no evidence of this improving  
21 patients' overall outcomes. This is the first systematic review to investigate the health service  
22 initiatives undertaken in recovery rooms, and their impact on patient outcomes after PACU discharge.  
23 There is a striking paucity of literature on this topic, with very few high-quality studies; and further  
24 research is required to evaluate and improve the care of post-operative patients in the recovery room  
25 setting.  
26  
27  
28  
29  
30  
31  
32  
33  
34

### 35 **FUNDING**

36 This systematic review was undertaken as part of a Masters of Clinical Sciences with the University of  
37 Adelaide, funded by the Australian Government's Research Training Program (Commonwealth  
38 funded).  
39  
40  
41  
42  
43

### 44 **COMPETING INTERESTS**

45 No conflicts of interest known at the time of writing the review. Affiliations; The Royal Adelaide  
46 Hospital and the University of Adelaide.  
47  
48  
49

### 50 **AUTHOR STATEMENT**

51 CL developed the review protocol, completed all title and abstract screening, full text reviews and data  
52 analysis. She completed the risk of bias assessment with GL. CL also drafted and revised the  
53 manuscript. GL developed the initial review question, and assisted writing the review protocol. He  
54 also completed the full text reviews, reviewed all data of included studies and completed the risk of  
55 bias assessment with CL. He also critically appraised the draft manuscript. DS assisted with developing  
56  
57  
58  
59  
60

1  
2  
3 the initial review question, and reviewed all included articles for consensus. He also critically appraised  
4 the draft manuscript, and assisted with revisions. GM reviewed all included articles for consensus, and  
5 critically appraised the manuscript. All authors have given final approval for publication. There were  
6 no other contributors.  
7  
8  
9

## 10 DATA SHARING STATEMENT

11 There was no new data produced by this research. Data extracted from the original studies is available  
12 in the online supplementary tables.  
13  
14  
15  
16

## 17 FIGURE LEGEND

18 Figure 1: Flow diagram for selection of studies included in review  
19  
20  
21  
22

## 23 REFERENCES

- 24 1. Zuck, D., *Anaesthetic and Postoperative Recovery Rooms. Some notes on their early history.* *Anaesthesia*, 1995. **50**: p. 435-438.
- 25 2. Aps, C., *Surgical critical care: the Overnight Intensive Recovery (OIR) concept.* *Br J Anaesth*,  
26 2004. **92**(2): p. 164-6.
- 27 3. Swart, M., J.B. Carlisle, and J. Goddard, *Using predicted 30 day mortality to plan postoperative*  
28 *colorectal surgery care: a cohort study.* *Br J Anaesth*, 2017. **118**(1): p. 100-104.
- 29 4. Bellomo, R., et al., *A before and after trial of the effect of a high-dependency unit on post-*  
30 *operative morbidity and mortality.* *Crit Care Resusc*, 2005. **7**(1): p. 16-21.
- 31 5. Katz, S.G. and R.D. Kohl, *Selective use of the intensive care unit after nonaortic arterial surgery.*  
32 *J Vasc Surg*, 1996. **24**(2): p. 235-9.
- 33 6. Weiser, T.G., et al., *An estimation of the global volume of surgery: a modelling strategy based*  
34 *on available data.* *Lancet*, 2008. **372**(9633): p. 139-44.
- 35 7. Ludbrook, G., *Hidden pandemic of postoperative complications-time to turn our focus to*  
36 *health systems analysis.* *Br J Anaesth*, 2018. **121**(6): p. 1190-1192.
- 37 8. Callaghan, C.J., et al., *Overnight intensive recovery: elective open aortic surgery without a*  
38 *routine ICU bed.* *Eur J Vasc Endovasc Surg*, 2005. **30**(3): p. 252-8.
- 39 9. Eichenberger, A.S., et al., *A clinical pathway in a post-anaesthesia care unit to reduce length*  
40 *of stay, mortality and unplanned intensive care unit admission.* *Eur J Anaesthesiol*, 2011.  
41 **28**(12): p. 859-66.
- 42 10. Kastrup, M., et al., *Effects of intensivist coverage in a post-anaesthesia care unit on surgical*  
43 *patients' case mix and characteristics of the intensive care unit.* *Crit Care*, 2012. **16**(4): p. R126.
- 44 11. Tayrose, G., et al., *Rapid mobilization decreases length-of-stay in joint replacement patients.*  
45 *Bull Hosp Jt Dis* (2013), 2013. **71**(3): p. 222-6.
- 46 12. Fraser, C. and A. Nair, *Reducing critical care admissions after elective surgery by opening an*  
47 *extended recovery unit at the Northern General Hospital, Sheffield.* *Anaesthesia*, 2016. **71**: p.  
48 50.
- 49 13. Schweizer, A., et al., *Opening of a new postanesthesia care unit: impact on critical care*  
50 *utilization and complications following major vascular and thoracic surgery.* *J Clin Anesth*,  
51 2002. **14**(7): p. 486-93.
- 52 14. Street, M., et al., *Effect of a newly designed observation, response and discharge chart in the*  
53 *Post Anaesthesia Care Unit on patient outcomes: a quasi-experimental study in Australia.* *BMJ*  
54 *Open*, 2017. **7**(12): p. e015149.  
55  
56  
57  
58  
59  
60

- 1  
2  
3 15. Zoremba, M., et al., *Short-term respiratory physical therapy treatment in the PACU and*  
4 *influence on postoperative lung function in obese adults.* *Obes Surg*, 2009. **19**(10): p. 1346-54.  
5  
6  
7  
8  
9  
10  
11  
12  
13  
14  
15  
16  
17  
18  
19  
20  
21  
22  
23  
24  
25  
26  
27  
28  
29  
30  
31  
32  
33  
34  
35  
36  
37  
38  
39  
40  
41  
42  
43  
44  
45  
46  
47  
48  
49  
50  
51  
52  
53  
54  
55  
56  
57  
58  
59  
60

For peer review only

1  
2  
3  
4  
5  
6  
7  
8  
9  
10  
11  
12  
13  
14  
15  
16  
17  
18  
19  
20  
21  
22  
23  
24  
25  
26  
27  
28  
29  
30  
31  
32  
33  
34  
35  
36  
37  
38  
39  
40  
41  
42  
43  
44  
45  
46  
47  
48  
49  
50  
51  
52  
53  
54  
55  
56  
57  
58  
59  
60

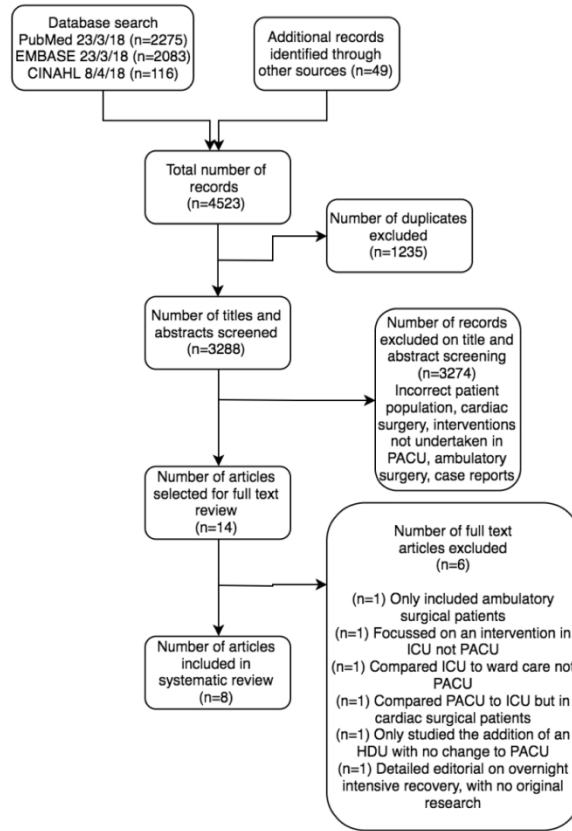

Figure 1

**Appendix 1.**

*PubMed Electronic Search Strategy*

| Postoperative period                                                                                                                                                                                                                                                                                                                                                                                                                                                                                    | Adults                                                                                                                                                                                    | Recovery room                                                                                                                                                                                                                                                                                                                                 | Patient outcomes                                                                                                                                                                                                                                                                                                                                                                                                                                                                                                                                                                                                                                  |
|---------------------------------------------------------------------------------------------------------------------------------------------------------------------------------------------------------------------------------------------------------------------------------------------------------------------------------------------------------------------------------------------------------------------------------------------------------------------------------------------------------|-------------------------------------------------------------------------------------------------------------------------------------------------------------------------------------------|-----------------------------------------------------------------------------------------------------------------------------------------------------------------------------------------------------------------------------------------------------------------------------------------------------------------------------------------------|---------------------------------------------------------------------------------------------------------------------------------------------------------------------------------------------------------------------------------------------------------------------------------------------------------------------------------------------------------------------------------------------------------------------------------------------------------------------------------------------------------------------------------------------------------------------------------------------------------------------------------------------------|
| "Postoperative Period"[mh] OR Anesthesia[mh] OR "surgical procedures, operative"[mh] OR "perioperative period"[mh] OR "Postoperative period"[tiab] OR "post anaesthes*" [tiab] OR "post anesthes*" [tiab] OR postoperative[tiab] OR "post operative"[tiab] OR "Anesthesia recovery period"[tiab] OR "Anaesthesia recovery period"[tiab] OR anesthesia[tiab] OR anaesthesia[tiab] OR "surgical procedures"[tiab] OR surger*[tiab] OR operation*[tiab] OR operative[tiab] OR "perioperative period"[tiab] | "adult"[mh] OR adult*[tiab] OR elderly[tiab] OR "young adult*" [tiab] OR OR "young people"[tiab] OR "aged person"[tiab] OR OR "aged people"[tiab] OR "post senior*" [tiab] OR frail[tiab] | OR "recovery room"[mh] OR PACU[tiab] OR "recovery room"[tiab] OR "advanced recovery room"[tiab] OR "extended recovery room"[tiab] OR OR "post anaesthesia care unit*" [tiab] OR OR anesthesia care unit*" [tiab] OR "postanaesthesia care unit*" [tiab] OR OR "postanesthesia care unit*" [tiab] OR OR "post operative recovery unit*" [tiab] | "Patient outcome assessment"[mh] OR "treatment outcome"[mh] OR OR mortality[mh] OR "length of stay"[mh] OR OR "postoperative complications"[mh] OR OR reoperation*[mh] OR OR "Patient outcome assessment"[tiab] OR OR "patient outcome*" [tiab] OR OR or outcome*[tiab] OR OR "treatment outcome"[tiab] OR OR mortality[tiab] OR OR "fatal outcome*" [tiab] OR OR morbidity[tiab] OR OR "length of stay"[tiab] OR OR "postoperative complications"[tiab] OR OR "return to theatre"[tiab] OR OR complication*[tiab] OR OR "intensive care"[tiab] OR OR "intensive care admission"[tiab] OR OR "health outcome"[tiab] OR OR "adverse event*" [tiab] |



## Characteristics of Included Studies Additional Tables

### Participants additional table:

| Source                                | Location and Setting                                                                                                                                                  | Inclusion Criteria                                                                                                                                                                                                                             | Exclusion Criteria                                                                                                                                                               | Ages involved                                                                                                                      | Gender                                                                                     | Exclusion of important groups                                                                                 | Numbers involved                                       |
|---------------------------------------|-----------------------------------------------------------------------------------------------------------------------------------------------------------------------|------------------------------------------------------------------------------------------------------------------------------------------------------------------------------------------------------------------------------------------------|----------------------------------------------------------------------------------------------------------------------------------------------------------------------------------|------------------------------------------------------------------------------------------------------------------------------------|--------------------------------------------------------------------------------------------|---------------------------------------------------------------------------------------------------------------|--------------------------------------------------------|
| Callaghan, Lynch et al. 2005          | Addenbrooke's Hospital. Cambridge, United Kingdom.<br><br>Cambridge vascular unit, OIR (based in PACU) and ICU, within a major teaching hospital and research centre. | All patients undergoing elective open aortic surgery between 1/01/98 and 31/12/02.                                                                                                                                                             | Patients with missing case notes.                                                                                                                                                | Median age for all patients was 72 (66-77)                                                                                         | Intervention group: 88% males<br>Comparison group: 85% males                               | No group appears to be excluded from the study. However, some multi-morbid patients were not offered surgery. | Intervention group n=152<br>Comparison group n=26      |
| Eichenberger, Haller et al. 2011      | Geneva hospital Switzerland.<br><br>Post Anaesthesia Care Unit (PACU), within a tertiary teaching hospital.                                                           | All elective and non-elective inpatients, who underwent a surgical or endoscopic procedure under anaesthesia (including major surgery and high risk surgical patients required temporary NIV, haemodynamic support and continuous monitoring). | Exclusion: multi-trauma, persistent intraoperative shock, transplants, cardiac surgery and intra-operative respiratory failure.                                                  | Before period:<br><49yo 34.25%,<br>49-67yo 32.6%,<br>>67yo 33.3%<br>After period:<br><49yo 34.7%,<br>49-67yo 32.5%,<br>>67yo 32.8% | Intervention group: male 56.3%, female 43.7%<br>Comparison group: male 55.9%, female 44.1% | No groups excluded apart from those patients already specified in the exclusion criteria.                     | Intervention group n=3345<br>Comparison group n=3030   |
| Fraser and Nair 2016                  | Northern General Hospital Sheffield, England.<br><br>Extended recovery unit within a tertiary teaching hospital, major trauma centre.                                 | Elective surgical patients who would have previously been booked for level 2 care post-operatively. Including patients with significant comorbidities, endovascular AAA repair, carotid endarterectomy and revision arthroplasty.              | Not stated                                                                                                                                                                       | Not stated                                                                                                                         | Not stated                                                                                 | No apparent exclusion of specific population groups. Not specifically addressed.                              | Intervention group n=119                               |
| Kastrup, Seeling et al. 2012          | The Charite-University Hospital Campus Mitte Berlin, Germany. PACU within a large tertiary teaching hospital.                                                         | All patients undergoing a surgical procedure (adults and children) between 1/01/08 – 30/04/11                                                                                                                                                  | Ambulatory surgical patients, patients who were readmitted to hospital for the same reason as the initial admission (due to issues with accuracy of the administrative database) | Not given                                                                                                                          | Not stated                                                                                 | No apparent exclusion of specific population groups. Not specifically addressed.                              | Intervention group n=26118<br>Comparison group n=24972 |
| Schweizer, Khatchatourian et al. 2002 | The University Hospital of Geneva, Switzerland.<br><br>PACU within a tertiary teaching hospital.                                                                      | Adult patients undergoing abdominal aortic reconstruction or resection of lung cancer.                                                                                                                                                         | Exclusion criteria not stated                                                                                                                                                    | Not stated                                                                                                                         | Not stated                                                                                 | No apparent exclusion of specific population groups. Not specifically addressed.                              | Intervention group n= 485<br>Comparison group n= 448   |

|                                                          |                              |                                                                                                                      |                                                                                                                                                                                                                                |                                                                                                                                                                                                                                                                                                                                            |                                                                                      |                                                                                               |                                                                                                                                                                                                    |                                                    |
|----------------------------------------------------------|------------------------------|----------------------------------------------------------------------------------------------------------------------|--------------------------------------------------------------------------------------------------------------------------------------------------------------------------------------------------------------------------------|--------------------------------------------------------------------------------------------------------------------------------------------------------------------------------------------------------------------------------------------------------------------------------------------------------------------------------------------|--------------------------------------------------------------------------------------|-----------------------------------------------------------------------------------------------|----------------------------------------------------------------------------------------------------------------------------------------------------------------------------------------------------|----------------------------------------------------|
| 1<br>2<br>3<br>4<br>5<br>6<br>7                          | Street, Phillips et al. 2017 | Three hospitals within one Australian metropolitan healthcare organisation.<br><br>PACUs within the three hospitals. | All adult patients undergoing elective surgery on days of data collection before and after the implementation of PACT (before period July-Oct 2012) (after period July-Sept 2014). (Half the patients were day surgery cases.) | Emergency surgery, minor procedure only requiring sedation, post-operative planned admission to ICU.                                                                                                                                                                                                                                       | Intervention group: mean= 50.87 (SD 17.4)<br>Comparison group: mean= 52.14 (SD 18.6) | Intervention group: male= 38.8%, female= 61.2%<br>Comparison group: male=41.6%, female= 58.4% | No specific groups appear to have been excluded from the study.                                                                                                                                    | Intervention group n=694<br>Comparison group n=723 |
| 8<br>9<br>10<br>11<br>12<br>13<br>14                     | Tayrose, Newman et al. 2013  | NYU hospital for Joint Diseases, New York.<br><br>Recovery room and general orthopaedic ward.                        | 900 consecutive hip and knee arthroplasty patients.                                                                                                                                                                            | Not stated                                                                                                                                                                                                                                                                                                                                 | Intervention group: mean= 63.7<br>Comparison group: mean= 64.3                       | Intervention group: male=125, female=206<br>Comparison group: male= 216, female=353           | Unable to assess, and exclusion criteria are not stated.                                                                                                                                           | Intervention group n=331<br>Comparison group n=569 |
| 15<br>16<br>17<br>18<br>19<br>20<br>21<br>22<br>23<br>24 | Zoremba, Dette et al. 2009   | University of Marburg, Germany.<br><br>PACU within a tertiary teaching hospital.                                     | 60 obese adult patients (BMI 30-40) ASA 2-3, scheduled for minor peripheral surgery. Minimum surgery duration=40min, maximum surgery duration= 120 min.                                                                        | Abdominal surgery, surgery requiring head-down tilt, history of GORD, hiatus hernia, likely difficult intubation, pregnancy, emergency operation, severe renal dysfunction, asthma requiring therapy, cardiac disease associated with dyspnoea (NYHA >2), severe psychiatric disorders or difficulties in cooperating during measurements. | Intervention group: mean 52 years<br>Control group: mean 53 years                    | Not stated                                                                                    | Multimorbid patients with ASA >3 have been excluded (this is stated specifically in the exclusion criteria). All major surgery (including abdominal surgery) has also been intentionally excluded. | Intervention group n=30<br>Control group n=30      |

25  
26  
27  
28  
29  
30  
31  
32  
33  
34  
35  
36  
37  
38  
39  
40  
41  
42  
43  
44  
45  
46

## Interventions additional table:

| <i>Source</i>                    | <i>Intervention name</i>                                                                                           | <i>Aims and rationale</i>                                                                                                                                                                                                                                                               | <i>Methods</i>                                                                                                                                                                                                                                                                                                                                                                                                                                                                                                                                                           | <i>Intervention delivery (staff and location)</i>                                                                                                                                                                                                                                                                                 | <i>Timing of intervention</i>                                                                                                                     | <i>Tailoring of intervention</i>                                                                                                     | <i>Modifications made</i>                                                                                                      | <i>Assessment of fidelity</i>                                                                                                                                                              |
|----------------------------------|--------------------------------------------------------------------------------------------------------------------|-----------------------------------------------------------------------------------------------------------------------------------------------------------------------------------------------------------------------------------------------------------------------------------------|--------------------------------------------------------------------------------------------------------------------------------------------------------------------------------------------------------------------------------------------------------------------------------------------------------------------------------------------------------------------------------------------------------------------------------------------------------------------------------------------------------------------------------------------------------------------------|-----------------------------------------------------------------------------------------------------------------------------------------------------------------------------------------------------------------------------------------------------------------------------------------------------------------------------------|---------------------------------------------------------------------------------------------------------------------------------------------------|--------------------------------------------------------------------------------------------------------------------------------------|--------------------------------------------------------------------------------------------------------------------------------|--------------------------------------------------------------------------------------------------------------------------------------------------------------------------------------------|
| Callaghan, Lynch et al. 2005     | Introduction of OIR (Overnight Intensive Recovery)                                                                 | The majority of vascular surgical patients were routinely admitted to ICU post-operatively. However, several studies have demonstrated that extubation in theatre after AAA repair is safe[1] and that routine admission to ICU after infra-renal aortic surgery is unnecessary [2, 3]. | <p>Surgical patients assessed preoperatively by vascular surgeon and anaesthetist (ECG and full bloods). Patient referred to specialist if further pre-operative assessment is required.</p> <p>OIR located in theatre recovery. Maximum stay 24 hours. No facilities for mechanical ventilation or renal replacement therapy.</p> <p>Patients reviewed in the morning by surgical teams, and discharged to the ward if stable. If ongoing instability, patients transferred to ICU</p> <p>Face to face delivery of intervention</p> <p>No co-interventions apparent</p> | <p>Nurse to patient ratio 1:1</p> <p>Day time medical coverage provided by PACU anaesthetist and vascular surgical teams. Overnight medical care provided by the on-call anaesthetist and general surgical teams.</p> <p>No specific training or upskilling period detailed. Pre-existing medical and nursing skills required</p> | Intervention provided post-operatively for a maximum of 24 hours.                                                                                 | Post-operative medical care tailored to each patient. However, the OIR environment was not changed during the study.                 | OIR does not appear to have been modified or adapted during the study                                                          | No specific mention of steps taken to ensure fidelity in the OIR pathway. Anaesthetic techniques do appear to have been standardised, as well as post-operative analgesia.                 |
| Eichenberger, Haller et al. 2011 | Introduction of a two-track clinical pathway that clearly defined & coordinated medical and nursing interventions. | Post-operative complications have a major impact on survival, especially in the older population [4, 5]. A clinical review of current practices prior to implementation of the pathway showed that poorly defined                                                                       | <p>Fast track pathway: nurse driven, ASA 1-2. At 15min intervals nursing staff evaluate patients' vitals using Aldrete score, and pain is assessed using verbal numeric rating scale.</p> <p>Slow track pathway: physician driven, ASA 3-</p>                                                                                                                                                                                                                                                                                                                            | Fast-track programme: initial post-operative care prescribed by the anaesthetist and provided by the PACU nursing staff. Ongoing care is delivered by the PACU nursing staff only (unless                                                                                                                                         | Fast-track programme: care provided immediately post-operatively. Discharge performed without further communication with the PACU anaesthetist if | Initial post-op treatment plan prescribed by the treating anaesthetist was tailored to the patient and their specific medical needs. | No adaptations appear to have been made to either pathway during the study period. However, this is not specifically discussed | <p>Fast track pathway: methods of ensuring adherence to the pathway not discussed.</p> <p>Slow track pathway: adherence to the clinical pathway was ensured during daily rounds by the</p> |

|                              |                                              |                                                                                                                                                                                                                                                                                                                                |                                                                                                                                                                                                                                                                                                                                                                                                                              |                                                                                                                                                                                                                                                                                                                                            |                                                                                                                                                                                                                                                                           |                                                                        |                                                        |                                                                                                                                                                                    |
|------------------------------|----------------------------------------------|--------------------------------------------------------------------------------------------------------------------------------------------------------------------------------------------------------------------------------------------------------------------------------------------------------------------------------|------------------------------------------------------------------------------------------------------------------------------------------------------------------------------------------------------------------------------------------------------------------------------------------------------------------------------------------------------------------------------------------------------------------------------|--------------------------------------------------------------------------------------------------------------------------------------------------------------------------------------------------------------------------------------------------------------------------------------------------------------------------------------------|---------------------------------------------------------------------------------------------------------------------------------------------------------------------------------------------------------------------------------------------------------------------------|------------------------------------------------------------------------|--------------------------------------------------------|------------------------------------------------------------------------------------------------------------------------------------------------------------------------------------|
|                              |                                              | management and discharge criteria resulted in insecurity of the PACU physicians, nursing staff stress and delayed admission of patients from theatre. Evidence suggests that significant post-operative complications can be detected and successfully treated in well-organised PACUs, resulting in increased survival [6-9]. | 5 who have undergone minor or major surgery, or developed post-op complications. Formal handover to PACU anaesthetist. Standardised investigations and treatment guidelines for early post-operative complications. Intervention delivered face-to-face in PACU. No co-interventions identified                                                                                                                              | there is evidence of a complication).<br><br>Slow-track programme: care provided by the PACU anaesthetist with the help of nursing staff<br><br>Pre-existing skills required: PACU specialist nursing staff (overnight nurse also ICU qualified). No specific training for either nursing staff or medical staff is detailed in the study. | Aldrete score is $\geq 8$ and the verbal numeric rating scale is $\leq 3$<br><br>Slow-track programme: care provided immediately post-operatively. Discharge based on Aldrete score $\geq 8$ and normal blood gas analysis. PACU physician in charge decides on discharge |                                                                        |                                                        | medical head of the PACU, and during weekly quality control, feedback and information meetings.                                                                                    |
| Fraser and Nair 2016         | Opening of an extended recovery unit         | Was felt that some patients admitted to critical care post-operatively only required short term monitoring and optimisation [10]. Unnecessary admissions of patients to critical care increases bed occupancy in the unit, and was contributing to significant numbers of OT cancellations.                                    | Extended Recovery Unit was opened in Oct 2014. Patients booked into the unit in advance. 4-6 hour stay. Standard form was completed by nursing staff for every patient: recording time and place of discharge, complications encountered and medical assistance required. (Recorded how many patients were assessed as safe to return to ward, and how many still required level 2 care)<br><br>Nil co-interventions evident | Anaesthetists provided post-op medical care/ plans in the extended recovery unit. Recovery nursing staff provided care and completed the standard service evaluation form.                                                                                                                                                                 | Patients stayed in the extended recovery unit for 4-6 hours post-op.                                                                                                                                                                                                      | Not tailored                                                           | No                                                     | No mention of steps taken to ensure standardisation of treatment. Standard form provided to nursing staff, but no mention if forms were audited to ensure correct data collection. |
| Kastrup, Seeling et al. 2012 | Introduction of intensivist coverage in PACU | Increasing demand for critical care, which can lead to capacity limitations in the ICU. This causes                                                                                                                                                                                                                            | PACU physician is in charge of allocation of patients to the PACU, ICU and IMCU (intermediate care unit)                                                                                                                                                                                                                                                                                                                     | Staffing of the PACU was changed so that both the nursing and physician staffing are covered by the ICU                                                                                                                                                                                                                                    | Intervention provided immediately post-operatively.                                                                                                                                                                                                                       | Immediate post-operative care tailored to each patient by the treating | No apparent modification to the intervention were made | There is no mention of fidelity assessment. As intervention was a change in staffing                                                                                               |

|                                                                                                                                                          |                                       |                                                                                                                                                                                                             |                                                                                                                                                                                                                                                                                                                                                                                                                                                                                                                                                                                                                                                                                                           |                                                                                                                                                                                                                                      |                                                                                                                                               |                                                                                                                                                                                               |                                                                           |                                                                                                                                                                                                                                                                                                                                                                                              |
|----------------------------------------------------------------------------------------------------------------------------------------------------------|---------------------------------------|-------------------------------------------------------------------------------------------------------------------------------------------------------------------------------------------------------------|-----------------------------------------------------------------------------------------------------------------------------------------------------------------------------------------------------------------------------------------------------------------------------------------------------------------------------------------------------------------------------------------------------------------------------------------------------------------------------------------------------------------------------------------------------------------------------------------------------------------------------------------------------------------------------------------------------------|--------------------------------------------------------------------------------------------------------------------------------------------------------------------------------------------------------------------------------------|-----------------------------------------------------------------------------------------------------------------------------------------------|-----------------------------------------------------------------------------------------------------------------------------------------------------------------------------------------------|---------------------------------------------------------------------------|----------------------------------------------------------------------------------------------------------------------------------------------------------------------------------------------------------------------------------------------------------------------------------------------------------------------------------------------------------------------------------------------|
| 1<br>2<br>3<br>4<br>5<br>6<br>7<br>8<br>9<br>10<br>11<br>12<br>13<br>14<br>15<br>16<br>17                                                                |                                       | delay in admissions of patients from ED, cancellation of surgery [11, 12], early discharge from ICU [11, 13-15], initiation of treatment in ED or on a standard ward and inter-hospital transfers [12, 16]. | in collaboration with the surgeons. If no intensive care bed available, patients can be treated in the PACU for up to 24 hours (independent of the degree of organ failure) There are 6 beds with complete intensive care monitoring and respiratory care possibilities available.<br><br>Face to face delivery of intervention<br><br>No co intervention evident or discussed                                                                                                                                                                                                                                                                                                                            | team. The physician staffing was changed to a 24hr in-house critical care physician and nurse presence for the PACU. 1:3 nurse, patient ratio. 1 physician for all PACU patients.                                                    | Patients can be immediately admitted to the PACU around the clock (without any delays).                                                       | anaesthetist and surgeon.                                                                                                                                                                     | during the study period.                                                  | model, this would have been monitored by the anaesthetist/ICU physician in charge.                                                                                                                                                                                                                                                                                                           |
| 18<br>19<br>20<br>21<br>22<br>23<br>24<br>25<br>26<br>27<br>28<br>29<br>30<br>31<br>32<br>33<br>34<br>35<br>36<br>37<br>38<br>39<br>40<br>41<br>42<br>43 | Schweizer, Khatchatourian et al. 2002 | Opening of a new PACU (post-anaesthesia care unit)                                                                                                                                                          | Utilisation of the ICU for routine post-op care is commonplace, however ICUs account for an increasing proportion of a hospitals budget [17-19].<br><br>PACU moved to an area closer to theatres and the ICU, and was expended with additional beds to provide overnight care following major, non-cardiac surgery.<br><br>Standardised rounding (morning and evening), with review of patient's clinical status, laboratory results and chest radiographs.<br><br>Co-interventions: Preoperative risk assessment guidelines of the American Heart association and the American College of Cardiology (AHA/ACC) were introduced, and antiadrenergic medications (beta-blockers and alpha-2-agonists) were | New PACU staffed with anaesthesia-trained nurses (1:3 ratio), post-operative care coordinated by cardiothoracic surgical and anaesthesia teams, 24-hour medical coverage provided by one PACU resident (supervised by an attending). | New PACU provided 24-hour medical coverage. Patients were admitted immediately post-operatively. (Time limit on PACU admission not specified) | Post-operative care standardised as much as possible, but ongoing care tailored to each patient based on pre-existing medical comorbidities, intra-operative events and post-op complications | Intervention does not appear to have been altered during the study period | Variations in medical practice were minimised using standard protocols for blood test analysis, CXR orders, antibiotic prophylaxis, pain control, fluid administration, respiratory therapy, nutrition and mobilisation.<br><br>All surgical procedures and approach standardised as much as possible. General anaesthesia standardised. Post-operative analgesia regimen also standardised. |

|                              |                                                       |                                                                                                                                                                                                                                                                                                                                                                                                                   |                                                                                                                                                                                                                                                                                                                                                                                                                                                                                                                                                                                                                                                                                                                                                                                                              |                                                                                                                                                                                                                                                                                                                                                                                     |                                                                                                                                                                                                                                                                                                                                                                                 |                                                     |                                                                                   |                                                                                                                                                                                                                                                                           |
|------------------------------|-------------------------------------------------------|-------------------------------------------------------------------------------------------------------------------------------------------------------------------------------------------------------------------------------------------------------------------------------------------------------------------------------------------------------------------------------------------------------------------|--------------------------------------------------------------------------------------------------------------------------------------------------------------------------------------------------------------------------------------------------------------------------------------------------------------------------------------------------------------------------------------------------------------------------------------------------------------------------------------------------------------------------------------------------------------------------------------------------------------------------------------------------------------------------------------------------------------------------------------------------------------------------------------------------------------|-------------------------------------------------------------------------------------------------------------------------------------------------------------------------------------------------------------------------------------------------------------------------------------------------------------------------------------------------------------------------------------|---------------------------------------------------------------------------------------------------------------------------------------------------------------------------------------------------------------------------------------------------------------------------------------------------------------------------------------------------------------------------------|-----------------------------------------------------|-----------------------------------------------------------------------------------|---------------------------------------------------------------------------------------------------------------------------------------------------------------------------------------------------------------------------------------------------------------------------|
|                              |                                                       |                                                                                                                                                                                                                                                                                                                                                                                                                   | increasingly administered peri operatively                                                                                                                                                                                                                                                                                                                                                                                                                                                                                                                                                                                                                                                                                                                                                                   |                                                                                                                                                                                                                                                                                                                                                                                     |                                                                                                                                                                                                                                                                                                                                                                                 |                                                     |                                                                                   |                                                                                                                                                                                                                                                                           |
| Street, Phillips et al. 2017 | Implementation of a Post Anaesthesia Care Tool (PACT) | Current post-operative death rate of 0.4-4%, and major complication rate of 3-17%. 40% of in-hospital complications are associated with surgery [20, 21]. Hospital costs for surgical patients experiencing a complication are significantly higher than for patients without complications [22-24]. Intensive observation of patients in PACU by nurses can help with the early detection of complications [25]. | <p>Implementation of the tool was supported by peri-operative nursing educators. Materials included posters summarising how to complete the PACT, and feedback sessions between the nurses using the tool and the perioperative team. PACT was included in the revised 'Post-anaesthetics care record'</p> <p>Working party was established to develop the tool. Extensive review of the current processes at each of the hospitals was done. Researchers conducted a systematic review and an expert consensus statement to evaluate the current evidence. PACT tool developed in line with the National Consensus Statement on the essential elements for recognising and responding to clinical deterioration.</p> <p>Face to face delivery of the intervention.</p> <p>No co-interventions apparent.</p> | <p>Perioperative nurse educators trained recovery nurses in the use of the tool. Feedback sessions during the training period were attended by the perioperative team including, educators, nurse unit managers and the quality unit of the organisation. Recovery nursing staff used the PACT in recovery. Medical staff responded to concerns that were triggered by the PACT</p> | <p>PACT used immediately post-operatively, until patient was safe for discharge to the ward (of home for day surgery patients).</p> <p>Patient readiness for discharge from PACU was recorded by a checklist of criteria: last 2 sets of observations were not within the MET criteria, no active vomiting, pain management ordered and all surgical concerns had been met.</p> | <p>Intervention does not appear to be tailored.</p> | <p>No modifications appear to have been made once the study period commenced.</p> | <p>Feedback sessions during the training period were attended by the perioperative team including, educators, nurse unit managers and the quality unit of the organisation. However, there is no mention of fidelity assessment or auditing once the tool was in use.</p> |
| Tayrose, Newman et al. 2013  | Rapid rehab patients started as part of a pilot       | Previous studies have shown that early mobilisation after                                                                                                                                                                                                                                                                                                                                                         | Therapy program was the same for each group: therapist would                                                                                                                                                                                                                                                                                                                                                                                                                                                                                                                                                                                                                                                                                                                                                 | Physiotherapists delivered the intervention                                                                                                                                                                                                                                                                                                                                         | Therapy commenced in the                                                                                                                                                                                                                                                                                                                                                        | Intervention was tailored to the speed of recovery  | No adaptations or modifications appear to have                                    | No assessment of fidelity reported. Unclear how the                                                                                                                                                                                                                       |

1  
2  
3  
4  
5  
6  
7  
8  
9  
10  
11  
12  
13  
14  
15  
16  
17  
18  
19  
20  
21  
22  
23  
24  
25  
26  
27  
28  
29  
30  
31  
32  
33  
34  
35  
36  
37  
38  
39  
40  
41  
42  
43  
44  
45  
46

|                            |                                                                                 |                                                                                                                                                                                                                                                                                                                                                                                                      |                                                                                                                                                                                                                                                                                                                                                                                                                                                   |                                                                                                                                                                                                                                                   |                                                                                                            |                                                                                                                                                                                                                 |                                            |                                                                                                                                                                                                                                                                                                                                                         |
|----------------------------|---------------------------------------------------------------------------------|------------------------------------------------------------------------------------------------------------------------------------------------------------------------------------------------------------------------------------------------------------------------------------------------------------------------------------------------------------------------------------------------------|---------------------------------------------------------------------------------------------------------------------------------------------------------------------------------------------------------------------------------------------------------------------------------------------------------------------------------------------------------------------------------------------------------------------------------------------------|---------------------------------------------------------------------------------------------------------------------------------------------------------------------------------------------------------------------------------------------------|------------------------------------------------------------------------------------------------------------|-----------------------------------------------------------------------------------------------------------------------------------------------------------------------------------------------------------------|--------------------------------------------|---------------------------------------------------------------------------------------------------------------------------------------------------------------------------------------------------------------------------------------------------------------------------------------------------------------------------------------------------------|
|                            | program where the first 2 cases of the day were mobilised in the recovery room. | total joint replacement enhances post-op recovery and promotes faster rehabilitation [26, 27]. Previous studies have also demonstrated early mobilisation leads to a decreased LOS, improve patient outcomes, and demonstrate cost savings [28-30]. However, it's unclear if early mobilisation that starts in the recovery room will lead to a reduction in LOS while maintaining patient outcomes. | start with having patients hang their legs over the side of the bed. Therapy would then progress with transferring to a chair, ambulation, and climbing stairs. The expectation for a patient was to ambulate 100 feet or greater, and climb 6 stairs, prior to discharge.<br>Face to face delivery of intervention by physiotherapists<br>No co-interventions described                                                                          | Standard rehabilitation program implemented. Reliance of physiotherapists pre-existing skills and training.                                                                                                                                       | recovery room on the day of surgery                                                                        | of each patient. If a patient was unfit to mobilise on the day of surgery in PACU (as per the anaesthetist, surgeon or ICU doctor), they were not mobilised despite being one of the first 2 cases for the day. | occurred during the study.                 | standardisation of the rehabilitation program was ensured.                                                                                                                                                                                                                                                                                              |
| Zoremba, Dette et al. 2009 | Patients performed incentive spirometry in the PACU                             | Even several days after surgery, obese patients exhibit a measurable amount of atelectasis, predisposing them to post-op pulmonary complications [31-35].                                                                                                                                                                                                                                            | Physiotherapist supervised the respiratory physiotherapy treatment at all times. Exercises were started approximately 15 minutes after extubation, and the patients were encouraged to perform 15 deep breaths (incentive spirometry) every 10-15 minutes within the first 2 hours after surgery. If needed, patients were asked to cough during the pause to mobilise secretions. All therapy was performed in the sitting position if possible. | Physiotherapists supervised the respiratory physiotherapy treatment at all times<br><br>Pre-existing skills required to deliver the intervention. No mention of specific training provided to the physiotherapists apart from the study protocol. | Intervention was delivered commencing 15 minutes post-operatively, continuing until 2 hours after surgery. | Intervention does not appear to have been tailored                                                                                                                                                              | No change to intervention during the study | Spirometry was standardised as much as possible. At each assessment time, spirometry was performed at least 3 times, and the best measurement was recorded (in line with the criteria of the European Respiratory Society). Factors that interfered with breathing (eg pain, shivering) were eliminated, or minimised to produce reliable measurements) |

No co-interventions described

#### Outcomes and comparison groups additional table:

| <i>Source</i>                    | <i>Primary outcomes</i>                                      | <i>Method of assessing primary outcome measure</i>                                                                                                                                                                                                                 | <i>Timing of primary outcome assessment</i>                                                                       | <i>Adverse events</i>                                  | <i>Secondary outcomes</i>                                       | <i>Method of assessing secondary outcome measure</i>                                                                                | <i>Timing of secondary outcome measure</i>              |
|----------------------------------|--------------------------------------------------------------|--------------------------------------------------------------------------------------------------------------------------------------------------------------------------------------------------------------------------------------------------------------------|-------------------------------------------------------------------------------------------------------------------|--------------------------------------------------------|-----------------------------------------------------------------|-------------------------------------------------------------------------------------------------------------------------------------|---------------------------------------------------------|
| Callaghan, Lynch et al. 2005     | In hospital mortality                                        | Patients who had surgery were identified using a combination of computerized theatre records, surgeon's logbooks, and theatre booking diaries. Case notes analysed retrospectively. POSSUM variables collected prospectively (during the pre-operative assessment) | Retrospective analysis<br>No follow-up required                                                                   | OIR group: Admission to ICU within 48 hours of surgery | Operative characteristics. Common post-operative complications. | Case notes analysed retrospectively. Only complications occurring on more than four occasions during the study period are included. | Retrospective analysis of notes. No follow-up required. |
|                                  | In hospital morbidity                                        |                                                                                                                                                                                                                                                                    |                                                                                                                   |                                                        |                                                                 |                                                                                                                                     |                                                         |
|                                  | Mean postoperative stay, days                                |                                                                                                                                                                                                                                                                    |                                                                                                                   |                                                        |                                                                 |                                                                                                                                     |                                                         |
|                                  | Median POSSUM operative severity score                       |                                                                                                                                                                                                                                                                    |                                                                                                                   |                                                        |                                                                 |                                                                                                                                     |                                                         |
| Eichenberger, Haller et al. 2011 | PACU length of stay                                          | Anaesthetic Information system (computerize patient information system. PACU data entered by PACU nurses and PACU secretary)                                                                                                                                       | Data entered in real time in PACU. Data reviewed retrospectively by investigators.                                | Nil reported                                           | Nil reported                                                    | NA                                                                                                                                  | NA                                                      |
|                                  | In-hospital mortality                                        | The hospital administrative database (administrative information used for financial purposes). Cause of death extracted from patient discharge reports, and entered into the administrative database by professional coders.                                       | Data entered throughout the post-operative period until discharge. Data reviewed retrospectively by investigators |                                                        |                                                                 |                                                                                                                                     |                                                         |
|                                  | Unplanned ICU admissions after PACU stay                     | The hospital administrative database. Reason for unplanned ICU admission extracted from patient discharge report and entered into database by professional coders.                                                                                                 | Data entered throughout the post-operative period. Reason for ICU admission entered after patient discharge.      |                                                        |                                                                 |                                                                                                                                     |                                                         |
| Fraser and Nair 2016             | Discharge destination after extended recovery unit admission | Standard form completed by nursing staff in extended recovery, documenting time and place of discharge, complications encountered and medical assistance required.                                                                                                 | Assessment made at time of extended recovery discharge. No follow-up done.                                        | Nil reported                                           | Nil reported                                                    | NA                                                                                                                                  | NA                                                      |



|                                       |                                                                                                                                                                                                                                                                                                                                                                                                                                                                   |                                                                                                                                                                                                                                                                                                                                                                                                                                                                                                                                                                                                                                                  |                                                                                                                                         |              |                                                                                                                                                                                                                                                                                                                        |                                                                                                                                                                                                                                                                                                           |                                                                                                                            |
|---------------------------------------|-------------------------------------------------------------------------------------------------------------------------------------------------------------------------------------------------------------------------------------------------------------------------------------------------------------------------------------------------------------------------------------------------------------------------------------------------------------------|--------------------------------------------------------------------------------------------------------------------------------------------------------------------------------------------------------------------------------------------------------------------------------------------------------------------------------------------------------------------------------------------------------------------------------------------------------------------------------------------------------------------------------------------------------------------------------------------------------------------------------------------------|-----------------------------------------------------------------------------------------------------------------------------------------|--------------|------------------------------------------------------------------------------------------------------------------------------------------------------------------------------------------------------------------------------------------------------------------------------------------------------------------------|-----------------------------------------------------------------------------------------------------------------------------------------------------------------------------------------------------------------------------------------------------------------------------------------------------------|----------------------------------------------------------------------------------------------------------------------------|
| Kastrup, Seeling et al. 2012          | <p>LOS in PACU (days)</p> <p>LOS in ICU (all types of ICU's)(days)</p> <p>Pre operative days (all patients)</p> <p>Pre operative day (PACU-patients)</p> <p>Pre operative day (ICU-patients)</p> <p>Days on normal ward</p> <p>LOS hospital (days)</p> <p>CMI (case mix index) normal ward</p> <p>CM ICU</p> <p>CW (cost weight) per hospital stay (overall)</p>                                                                                                  | Data collected from the hospital administration system. All clinically relevant data are documented in a patient data management system (PDMS) and can be extracted for evaluations. Every patient admitted to the ICU is included in the system (COPRA-System® GmbH, Sasbachwalden, Germany). 24-hours after patient discharge, the record is changed to a read-only version so that no modifications can be made.                                                                                                                                                                                                                              | Retrospective analysis of data. Data continuously collected until patient discharge. No follow-up post-discharge.                       | Nil reported | General descriptive variables for the ICU, before and after the introduction of the PACU (ICU patients only).                                                                                                                                                                                                          | Data extracted from patient data management system (PDMS). DRG system allows for coding of the intensive care as DRG procedure, making the severity of disease relevant for reimbursement. The "Complex intensive care treatment" is based on several scores, which are collected within the PDMS system. | Retrospective analysis of data. Data continuously collected until patient discharge. No follow-up post-discharge.          |
| Schweizer, Khatchatourian et al. 2002 | <p>Mortality</p> <p>Re-operation</p> <p>Secondary admission to ICU (either from PACU or from the ward)</p> <p>Cardiac complications</p> <ul style="list-style-type: none"> <li>• Myocardial infarct</li> <li>• Arrhythmias</li> <li>• Pulmonary oedema</li> </ul> <p>Respiratory complications</p> <ul style="list-style-type: none"> <li>• Atelectasis</li> <li>• Bronchopneumonia</li> </ul> <p>Mechanical ventilation &gt;6 hours</p> <p>Renal dysfunction</p> | <p>Data prospectively collected on standardized worksheets describing the pre-operative, intraoperative and postoperative periods. One investigator also reviewed all nursing charts, medical records and hospital discharge letters.</p> <p>Data abstracted from two institutional databases</p> <p>Data obtained from the hospital computer</p> <p>Data were prospectively collected on standardized worksheets describing the pre-operative, intraoperative and postoperative periods. One investigator also reviewed all nursing charts, medical records and hospital discharge letters.</p> <p>As above</p> <p>As above</p> <p>As above</p> | Outcome assessments done during inpatient stay, and on review of the hospital data base. No follow-up required after hospital discharge | Nil reported | <p>Identification of independent risk factors for mortality and major complications following thoracic surgery</p> <p>Identification of independent risk factors for mortality and major complications following major vascular surgery</p> <p>Evaluation of perioperative antiadrenergic treatment administration</p> | Data abstracted from two institutional databases                                                                                                                                                                                                                                                          | Patient risk factors reported pre-operatively and intraoperatively (prospective data collection). Analysed at a later date |

|                              |                                                           |                                                                                                                                                                                                                                                                                                                                                                                                                                                                          |                                                                                        |              |                                                           |                                                                                                                                                                                                                                                                                                                                                                                                                                                       |                                                                                      |
|------------------------------|-----------------------------------------------------------|--------------------------------------------------------------------------------------------------------------------------------------------------------------------------------------------------------------------------------------------------------------------------------------------------------------------------------------------------------------------------------------------------------------------------------------------------------------------------|----------------------------------------------------------------------------------------|--------------|-----------------------------------------------------------|-------------------------------------------------------------------------------------------------------------------------------------------------------------------------------------------------------------------------------------------------------------------------------------------------------------------------------------------------------------------------------------------------------------------------------------------------------|--------------------------------------------------------------------------------------|
|                              | Hospital length of stay                                   | Data obtained from the hospital computer                                                                                                                                                                                                                                                                                                                                                                                                                                 |                                                                                        |              |                                                           |                                                                                                                                                                                                                                                                                                                                                                                                                                                       |                                                                                      |
| Street, Phillips et al. 2017 | Nursing management of patient symptoms                    | Data collected by research nurses from the medical record following patient discharge. Severity of each adverse event was graded using the Common Terminology Criteria for Adverse Events (V.4.03) and grouped into mild (no or minimal effect to the patient and resolved spontaneously), moderate (event with resolved after intervention, with no lasting effect for the patient) and severe (required intervention and caused harm to the patient, including death). | Data reviewed from case notes on patient discharge. No longer term follow-up required. | Nil reported | Health service usage and healthcare costs                 | Economic evaluation done from organization data that were routinely submitted to the regional health department for benchmarking. Healthcare costs for each patient admitted to hospital are calculated on a cost-weight analysis using the Australian Refined Diagnostic-Related Groups (AR-DRGs). The AR-DRG was used to calculate the costs for all initial admissions and unplanned readmission, using the nations efficient price determination. | Data reviewed from case notes on patient discharge. No long term follow-up required. |
|                              | Rates of adverse events                                   |                                                                                                                                                                                                                                                                                                                                                                                                                                                                          |                                                                                        |              |                                                           |                                                                                                                                                                                                                                                                                                                                                                                                                                                       |                                                                                      |
|                              | Mortality                                                 |                                                                                                                                                                                                                                                                                                                                                                                                                                                                          |                                                                                        |              |                                                           |                                                                                                                                                                                                                                                                                                                                                                                                                                                       |                                                                                      |
|                              | Length of stay in PACU                                    |                                                                                                                                                                                                                                                                                                                                                                                                                                                                          |                                                                                        |              |                                                           |                                                                                                                                                                                                                                                                                                                                                                                                                                                       |                                                                                      |
|                              | Length of hospital admission                              |                                                                                                                                                                                                                                                                                                                                                                                                                                                                          |                                                                                        |              |                                                           |                                                                                                                                                                                                                                                                                                                                                                                                                                                       |                                                                                      |
|                              | Discharge destination                                     |                                                                                                                                                                                                                                                                                                                                                                                                                                                                          |                                                                                        |              |                                                           |                                                                                                                                                                                                                                                                                                                                                                                                                                                       |                                                                                      |
| Tayrose, Newman et al. 2013  | Overall hospital length of stay                           | Retrospective review of cases, however it is not stated how this was done (case note reviews versus use of the hospital's database)                                                                                                                                                                                                                                                                                                                                      | At time of discharge                                                                   | Nil reported | Percentage completion of the rapid rehabilitation program | Progression of rehab was followed, however methods for assessing this were not stated.                                                                                                                                                                                                                                                                                                                                                                | Followed as an inpatient until the time of discharge.                                |
|                              | Hip arthroplasty subgroup length of stay                  |                                                                                                                                                                                                                                                                                                                                                                                                                                                                          |                                                                                        |              |                                                           |                                                                                                                                                                                                                                                                                                                                                                                                                                                       |                                                                                      |
|                              | Knee arthroplasty subgroup length of stay                 |                                                                                                                                                                                                                                                                                                                                                                                                                                                                          |                                                                                        |              |                                                           |                                                                                                                                                                                                                                                                                                                                                                                                                                                       |                                                                                      |
| Zoremba, Dette et al. 2009   | Pulse oximetry at 1hr, 2hr, 6hr and 24hr post-operatively | Assessed face to face by an investigator. The investigators were blinded.                                                                                                                                                                                                                                                                                                                                                                                                | At 1hr, 2hr, 6hr and 24hr respectively                                                 | Nil reported | Nil reported                                              | NA                                                                                                                                                                                                                                                                                                                                                                                                                                                    | NA                                                                                   |
|                              | Spirometry at 1hr, 2hr, 6hr and 24hr post-operatively     |                                                                                                                                                                                                                                                                                                                                                                                                                                                                          |                                                                                        |              |                                                           |                                                                                                                                                                                                                                                                                                                                                                                                                                                       |                                                                                      |

- Cohen, J., et al., *The Safety of Immediate Extubation After Abdominal Aortic Surgery: A Prospective, Randomised Control Trial*. *Anaesth Analg*, 2001. **93**: p. 1546-1549.
- Bertges, D., et al., *Is Routine Use of the Intensive Care Unit After Elective Infrarenal Aortic Aneurysm Repair Necessary?* *J Vasc Surg*, 2000(32): p. 634-642.
- Podore, P.C. and E.B. Throop, *Infrarenal aortic surgery with a 3-day hospital stay: A report on success with a clinical pathway*. *J Vasc Surg*, 1999. **29**(5): p. 787-92.
- Khuri, S.F., et al., *Determinants of long-term survival after major surgery and the adverse effect of postoperative complications*. *Ann Surg*, 2005. **242**(3): p. 326-41; discussion 341-3.
- Manku, K. and J.M. Leung, *Prognostic significance of postoperative in-hospital complications in elderly patients. II. Long-term quality of life*. *Anesth Analg*, 2003. **96**(2): p. 590-4, table of contents.
- Brown, I., et al., *Use of postanesthesia discharge criteria to reduce discharge delays for inpatients in the postanesthesia care unit*. *J Clin Anesth*, 2008. **20**(3): p. 175-9.
- Thompson, J.S., et al., *Temporal patterns of postoperative complications*. *Arch Surg*, 2003. **138**(6): p. 596-602; discussion 602-3.
- Vlayen, A., et al., *Incidence and preventability of adverse events requiring intensive care admission: a systematic review*. *J Eval Clin Pract*, 2012. **18**(2): p. 485-97.
- Weissman, C. and N. Klein, *The importance of differentiating between elective and emergency postoperative critical care patients*. *J Crit Care*, 2008. **23**(3): p. 308-16.
- Montpellier, D., E. Hayek, and M. Ossart, *[Objectives of consultation in anesthesia]*. *Phlebologie*, 1989. **42**(1): p. 7-18; discussion 18-20.

- 1 11. Chalfin, D.B., et al., *Impact of delayed transfer of critically ill patients from the emergency department to the intensive care unit*. Crit Care Med, 2007. **35**(6): p. 1477-83.
- 2 12. Duke, G.J., *Metropolitan audit of appropriate referrals refused admission to intensive care*. Anaesth Intensive Care, 2004. **32**(5): p. 702-6.
- 3 13. Campbell, A.J., et al., *Predicting death and readmission after intensive care discharge*. Br J Anaesth, 2008. **100**(5): p. 656-62.
- 4 14. Hanane, T., et al., *The association between nighttime transfer from the intensive care unit and patient outcome*. Crit Care Med, 2008. **36**(8): p. 2232-7.
- 5 15. Priestap, F.A. and C.M. Martin, *Impact of intensive care unit discharge time on patient outcome*. Crit Care Med, 2006. **34**(12): p. 2946-51.
- 6 16. Duke, G.J., et al., *Interventions to circumvent intensive care access block: a retrospective 2-year study across metropolitan Melbourne*. Med J Aust, 2009. **190**(7): p. 375-8.
- 7 17. Hanson, C.W., 3rd, et al., *Effects of an organized critical care service on outcomes and resource utilization: a cohort study*. Crit Care Med, 1999. **27**(2): p. 270-4.
- 8 18. Pollack, M.M., et al., *Improving the outcome and efficiency of intensive care: the impact of an intensivist*. Crit Care Med, 1988. **16**(1): p. 11-7.
- 9 19. Singer, M., et al., *The cost of intensive care: a comparison on one unit between 1988 and 1991*. Intensive Care Med, 1994. **20**(8): p. 542-9.
- 10 20. Brennan, T.A., et al., *Incidence of adverse events and negligence in hospitalized patients: results of the Harvard Medical Practice Study I. 1991*. Qual Saf Health Care, 2004. **13**(2): p. 145-51; discussion 151-2.
- 11 21. Weiser, T.G., et al., *An estimation of the global volume of surgery: a modelling strategy based on available data*. Lancet, 2008. **372**(9633): p. 139-44.
- 12 22. Birkmeyer, J.D., et al., *Hospital quality and the cost of inpatient surgery in the United States*. Ann Surg, 2012. **255**(1): p. 1-5.
- 13 23. de Vries, E.N., et al., *The incidence and nature of in-hospital adverse events: a systematic review*. Qual Saf Health Care, 2008. **17**(3): p. 216-23.
- 14 24. Khan, N.A., et al., *Association of postoperative complications with hospital costs and length of stay in a tertiary care center*. J Gen Intern Med, 2006. **21**(2): p. 177-80.
- 15 25. Prowse, M.A. and P.A. Lyne, *Clinical effectiveness in the post-anaesthesia care unit: how nursing knowledge contributes to achieving intended patient outcomes*. J Adv Nurs, 2000. **31**(5): p. 1115-24.
- 16 26. Khan, F., et al., *Multidisciplinary rehabilitation programmes following joint replacement at the hip and knee in chronic arthropathy*. Cochrane Database Syst Rev, 2008(2): p. Cd004957.
- 17 27. Renkawitz, T., et al., *Comparison of two accelerated clinical pathways--after total knee replacement how fast can we really go?* Clin Rehabil, 2010. **24**(3): p. 230-9.
- 18 28. Husted, H., et al., *What determines length of stay after total hip and knee arthroplasty? A nationwide study in Denmark*. Arch Orthop Trauma Surg, 2010. **130**(2): p. 263-8.
- 19 29. Minns Lowe, C.J., et al., *Effectiveness of physiotherapy exercise following hip arthroplasty for osteoarthritis: a systematic review of clinical trials*. BMC Musculoskelet Disord, 2009. **10**: p. 98.
- 20 30. Schneider, M., et al., *Predictive factors influencing fast track rehabilitation following primary total hip and knee arthroplasty*. Arch Orthop Trauma Surg, 2009. **129**(12): p. 1585-91.
- 21 31. Brismar, B., et al., *Pulmonary densities during anesthesia with muscular relaxation--a proposal of atelectasis*. Anesthesiology, 1985. **62**(4): p. 422-8.
- 22 32. Hedenstierna, G., *Alveolar collapse and closure of airways: regular effects of anaesthesia*. Clin Physiol Funct Imaging, 2003. **23**(3): p. 123-9.
- 23 33. Pelosi, P., et al., *Respiratory system mechanics in sedated, paralyzed, morbidly obese patients*. J Appl Physiol (1985), 1997. **82**(3): p. 811-8.
- 24 34. Rothen, H.U., et al., *Airway closure, atelectasis and gas exchange during general anaesthesia*. Br J Anaesth, 1998. **81**(5): p. 681-6.
- 25 35. Tokics, L., et al., *Lung collapse and gas exchange during general anesthesia: effects of spontaneous breathing, muscle paralysis, and positive end-expiratory pressure*. Anesthesiology, 1987. **66**(2): p. 157-67.



# PRISMA 2009 Checklist

| Section/topic                      | #  | Checklist item                                                                                                                                                                                                                                                                                              | Reported on page # |
|------------------------------------|----|-------------------------------------------------------------------------------------------------------------------------------------------------------------------------------------------------------------------------------------------------------------------------------------------------------------|--------------------|
| <b>TITLE</b>                       |    |                                                                                                                                                                                                                                                                                                             |                    |
| Title                              | 1  | Identify the report as a systematic review, meta-analysis, or both.                                                                                                                                                                                                                                         | 1                  |
| <b>ABSTRACT</b>                    |    |                                                                                                                                                                                                                                                                                                             |                    |
| Structured summary                 | 2  | Provide a structured summary including, as applicable: background; objectives; data sources; study eligibility criteria, participants, and interventions; study appraisal and synthesis methods; results; limitations; conclusions and implications of key findings; systematic review registration number. | 2                  |
| <b>INTRODUCTION</b>                |    |                                                                                                                                                                                                                                                                                                             |                    |
| Rationale                          | 3  | Describe the rationale for the review in the context of what is already known.                                                                                                                                                                                                                              | 3                  |
| Objectives                         | 4  | Provide an explicit statement of questions being addressed with reference to participants, interventions, comparisons, outcomes, and study design (PICOS).                                                                                                                                                  | 4                  |
| <b>METHODS</b>                     |    |                                                                                                                                                                                                                                                                                                             |                    |
| Protocol and registration          | 5  | Indicate if a review protocol exists, if and where it can be accessed (e.g., Web address), and, if available, provide registration information including registration number.                                                                                                                               | 4                  |
| Eligibility criteria               | 6  | Specify study characteristics (e.g., PICOS, length of follow-up) and report characteristics (e.g., years considered, language, publication status) used as criteria for eligibility, giving rationale.                                                                                                      | 4                  |
| Information sources                | 7  | Describe all information sources (e.g., databases with dates of coverage, contact with study authors to identify additional studies) in the search and date last searched.                                                                                                                                  | 4                  |
| Search                             | 8  | Present full electronic search strategy for at least one database, including any limits used, such that it could be repeated.                                                                                                                                                                               | 16                 |
| Study selection                    | 9  | State the process for selecting studies (i.e., screening, eligibility, included in systematic review, and, if applicable, included in the meta-analysis).                                                                                                                                                   | 5                  |
| Data collection process            | 10 | Describe method of data extraction from reports (e.g., piloted forms, independently, in duplicate) and any processes for obtaining and confirming data from investigators.                                                                                                                                  | 5                  |
| Data items                         | 11 | List and define all variables for which data were sought (e.g., PICOS, funding sources) and any assumptions and simplifications made.                                                                                                                                                                       | 5                  |
| Risk of bias in individual studies | 12 | Describe methods used for assessing risk of bias of individual studies (including specification of whether this was done at the study or outcome level), and how this information is to be used in any data synthesis.                                                                                      | 5                  |
| Summary measures                   | 13 | State the principal summary measures (e.g., risk ratio, difference in means).                                                                                                                                                                                                                               | 5                  |
| Synthesis of results               | 14 | Describe the methods of handling data and combining results of studies, if done, including measures of consistency (e.g., $I^2$ ) for each meta-analysis.                                                                                                                                                   | NA                 |



# PRISMA 2009 Checklist

| Section/topic                 | #  | Checklist item                                                                                                                                                                                           | Reported on page # |
|-------------------------------|----|----------------------------------------------------------------------------------------------------------------------------------------------------------------------------------------------------------|--------------------|
| Risk of bias across studies   | 15 | Specify any assessment of risk of bias that may affect the cumulative evidence (e.g., publication bias, selective reporting within studies).                                                             | 6                  |
| Additional analyses           | 16 | Describe methods of additional analyses (e.g., sensitivity or subgroup analyses, meta-regression), if done, indicating which were pre-specified.                                                         | NA                 |
| <b>RESULTS</b>                |    |                                                                                                                                                                                                          |                    |
| Study selection               | 17 | Give numbers of studies screened, assessed for eligibility, and included in the review, with reasons for exclusions at each stage, ideally with a flow diagram.                                          | 6                  |
| Study characteristics         | 18 | For each study, present characteristics for which data were extracted (e.g., study size, PICOS, follow-up period) and provide the citations.                                                             | 7                  |
| Risk of bias within studies   | 19 | Present data on risk of bias of each study and, if available, any outcome level assessment (see item 12).                                                                                                | 9-11               |
| Results of individual studies | 20 | For all outcomes considered (benefits or harms), present, for each study: (a) simple summary data for each intervention group (b) effect estimates and confidence intervals, ideally with a forest plot. | 11-12              |
| Synthesis of results          | 21 | Present results of each meta-analysis done, including confidence intervals and measures of consistency.                                                                                                  | 13                 |
| Risk of bias across studies   | 22 | Present results of any assessment of risk of bias across studies (see Item 15).                                                                                                                          | 13                 |
| Additional analysis           | 23 | Give results of additional analyses, if done (e.g., sensitivity or subgroup analyses, meta-regression [see Item 16]).                                                                                    | NA                 |
| <b>DISCUSSION</b>             |    |                                                                                                                                                                                                          |                    |
| Summary of evidence           | 24 | Summarize the main findings including the strength of evidence for each main outcome; consider their relevance to key groups (e.g., healthcare providers, users, and policy makers).                     | 13                 |
| Limitations                   | 25 | Discuss limitations at study and outcome level (e.g., risk of bias), and at review-level (e.g., incomplete retrieval of identified research, reporting bias).                                            | 14                 |
| Conclusions                   | 26 | Provide a general interpretation of the results in the context of other evidence, and implications for future research.                                                                                  | 14                 |
| <b>FUNDING</b>                |    |                                                                                                                                                                                                          |                    |
| Funding                       | 27 | Describe sources of funding for the systematic review and other support (e.g., supply of data); role of funders for the systematic review.                                                               | 15                 |

From: Moher D, Liberati A, Tetzlaff J, Altman DG, The PRISMA Group (2009). Preferred Reporting Items for Systematic Reviews and Meta-Analyses: The PRISMA Statement. PLoS Med 6(7): e1000097. doi:10.1371/journal.pmed1000097

For more information, visit: [www.prisma-statement.org](http://www.prisma-statement.org).

# BMJ Open

**“What health system initiatives undertaken within operating suite recovery rooms within 48 hours post-operatively have been shown to improve patient outcomes after adult non-cardiac surgery: a systematic review.”**

|                                 |                                                                                                                                                                                                                                                                                                                                                |
|---------------------------------|------------------------------------------------------------------------------------------------------------------------------------------------------------------------------------------------------------------------------------------------------------------------------------------------------------------------------------------------|
| Journal:                        | <i>BMJ Open</i>                                                                                                                                                                                                                                                                                                                                |
| Manuscript ID                   | bmjopen-2018-027262.R2                                                                                                                                                                                                                                                                                                                         |
| Article Type:                   | Original research                                                                                                                                                                                                                                                                                                                              |
| Date Submitted by the Author:   | 30-Oct-2019                                                                                                                                                                                                                                                                                                                                    |
| Complete List of Authors:       | Lloyd, Courtney; University of Adelaide, Faculty of Health and Medical Sciences<br>Ludbrook, Guy; University of Adelaide,<br>Story, David; The University of Melbourne , Perioperative and Pain Medicine Unit, Melbourne Medical School<br>Maddern, Guy; University of Adelaide, Discipline of Surgery, Faculty of Health and Medical Sciences |
| <b>Primary Subject Heading</b>: | Anaesthesia                                                                                                                                                                                                                                                                                                                                    |
| Secondary Subject Heading:      | Health services research, Surgery, Anaesthesia                                                                                                                                                                                                                                                                                                 |
| Keywords:                       | Post-operative care, Post-anaesthetic care, Recovery room, Post-anaesthetic care unit (PACU), ANAESTHETICS, HEALTH SERVICES ADMINISTRATION & MANAGEMENT                                                                                                                                                                                        |
|                                 |                                                                                                                                                                                                                                                                                                                                                |

SCHOLARONE™  
Manuscripts



I, the Submitting Author has the right to grant and does grant on behalf of all authors of the Work (as defined in the below author licence), an exclusive licence and/or a non-exclusive licence for contributions from authors who are: i) UK Crown employees; ii) where BMJ has agreed a CC-BY licence shall apply, and/or iii) in accordance with the terms applicable for US Federal Government officers or employees acting as part of their official duties; on a worldwide, perpetual, irrevocable, royalty-free basis to BMJ Publishing Group Ltd ("BMJ") its licensees and where the relevant Journal is co-owned by BMJ to the co-owners of the Journal, to publish the Work in this journal and any other BMJ products and to exploit all rights, as set out in our [licence](#).

The Submitting Author accepts and understands that any supply made under these terms is made by BMJ to the Submitting Author unless you are acting as an employee on behalf of your employer or a postgraduate student of an affiliated institution which is paying any applicable article publishing charge ("APC") for Open Access articles. Where the Submitting Author wishes to make the Work available on an Open Access basis (and intends to pay the relevant APC), the terms of reuse of such Open Access shall be governed by a Creative Commons licence – details of these licences and which [Creative Commons](#) licence will apply to this Work are set out in our licence referred to above.

Other than as permitted in any relevant BMJ Author's Self Archiving Policies, I confirm this Work has not been accepted for publication elsewhere, is not being considered for publication elsewhere and does not duplicate material already published. I confirm all authors consent to publication of this Work and authorise the granting of this licence.



**TITLE PAGE**

“What health system initiatives undertaken within operating suite recovery rooms within 48 hours post-operatively have been shown to improve patient outcomes after adult non-cardiac surgery: a systematic review.”

**Corresponding Author:**

Dr Courtney Lloyd MBBS  
Masters of Clinical Sciences Candidate  
University of Adelaide  
Faculty of Health and Medical Sciences  
AHMS Floor 8  
North Terrace  
Adelaide, South Australia 5000  
Email: courtney.lloyd@sa.gov.au  
Phone: +61 417 876 536

**Other Authors:**

Professor Guy Ludbrook PhD, MBBS, FANZCA  
Professor of Anaesthesia  
University of Adelaide  
Faculty of Health and Medical Sciences  
AHMS Floor 8  
North Terrace  
Adelaide, South Australia 5000  
Email: guy.ludbrook@adelaide.edu.au

Professor David Story MBBS, MD, BMedSci, FANZCA  
Chair of Anaesthesia  
Deputy Director, Centre for Integrated Critical Care  
Head of MCATS  
The University of Melbourne  
Parkville, Victoria 3010  
Email: dastory@unimelb.edu.au

Professor Guy J. Maddern PhD, MS, MD, FRACS, FAHMS  
RP Jepson Professor of Surgery  
University of Adelaide Discipline of Surgery  
Faculty of Health and Medical Sciences  
Clinical Director Surgical Services, Central Adelaide Local Health Network  
The Queen Elizabeth Hospital  
Woodville, South Australia 5011  
Email: guy.maddern@adelaide.edu.au

**Word Count:** 3794



**ABSTRACT**

**Context:** Post-operative recovery rooms have existed since 1847, and the concept of Overnight Intensive Recovery has been successful since the 1990s. However, there is sparse literature investigating the interventions undertaken in recovery, and their impact on patients after recovery room discharge.

**Objective:** This review aimed to investigate any health system initiatives undertaken in post-operative recovery room up to 48 hours post-operatively; and their effect on patient outcomes; including mortality, morbidity, return to theatre, unplanned intensive care unit (ICU) admission and length of hospital stay.

**Data sources:** NCBI PubMed, EMBASE and CINAHL.

**Study selection:** Studies published from 1990 onwards, investigating health system initiatives undertaken in the post-operative recovery room, and their impact on patient outcomes. One author screened titles and abstracts, with two authors completing full text reviews to determine inclusion based on pre-determined criteria. A total of 3288 unique studies were identified, with 14 selected for full text reviews, and 8 included in the review.

**Data extraction:** EndNote 8 (Clarivate Analytics, Boston, USA) was used to manage references and exclude duplicates. One author extracted data from each study using a data extraction form adapted from the Cochrane Data Extraction Template, with all data checked by a second author.

**Data synthesis:** Narrative synthesis of data was the primary outcome measure, with all data of individual studies also presented in the summary results table.

**Conclusions:** Managing selected post-operative patients in a Recovery Room, or PACU, instead of ICU, does not appear to be associated with worse patient outcomes, however due to the high risk of bias within studies, the strength of evidence is moderate at best. Four of eight studies also examined hospital length of stay, and two found the intervention was associated with decreased length of stay and two found no association.

1  
2  
3 Key words: Post-operative care, post-anaesthetic care, recovery room, post-anaesthetic care unit  
4 (PACU)  
5  
6  
7

## 8 **STRENGTHS AND LIMITATIONS OF THIS STUDY**

- 9 • This is the first systematic review to provide a summary of health system initiatives in recovery  
10 and their impact on patient outcomes. It is a current area of interest for many hospitals/health  
11 networks, due to the frequency and cost of post-operative complications.  
12
- 13 • The PRISMA statement was strictly adhered to, with a broad search strategy in an attempt to  
14 capture all relevant publications.  
15
- 16 • The variation in study designs and primary outcome measures meant that we were unable to  
17 combine data for aggregate analysis or meta-analysis.  
18
- 19 • Narrative synthesis of key results may introduce bias; however, steps were taken to minimise  
20 this, including the review of all data by a second author.  
21  
22  
23  
24  
25

## 26 **INTRODUCTION**

### 27 **Rationale**

28  
29 The concept of a post-operative recovery room, or post anaesthesia care unit (PACU), was first  
30 described in 1847 [1], and the progression of surgical and anaesthetic techniques has seen marked  
31 advances in their form and function. However, there is a striking paucity of literature investigating the  
32 interventions undertaken in recovery, and their impact on patients after recovery room discharge. An  
33 editorial by C. Aps in 2004, discussed the concept of Overnight Intensive Recovery; where patients can  
34 be managed in the PACU for up to 24 hours[2], to avoid unnecessary intensive care unit (ICU)  
35 admissions and decrease cancellations due to lack of bed availability. This concept was introduced in  
36 the 1990s at St Thomas' Hospital, London[2]; and despite its apparent success, has not spawned  
37 further research surrounding such a model of care. Swart et al retrospectively examined the impact  
38 of the loss of access to a high dependency unit (HDU) for post-operative management of medium risk  
39 patients, and showed a significant increase in emergency laparotomies and unplanned critical care  
40 admissions[3]. However, the use of HDU for post-operative patients has also been associated with an  
41 increase in post-operative respiratory complications[4]. The concept of extended 6-hour recovery  
42 followed by a monitored ward bed, instead of an elective ICU admission post-operatively, has also  
43 shown to be safe, with no worsening in patient outcomes[5]. This review focusses on health services  
44 research, also known as health systems research; investigating models of care delivery, rather than  
45 single therapeutic interventions. Health systems research is a multidisciplinary field that examines  
46 access to, and the use, cost, quality, delivery, organisation, financing and outcomes of health care  
47  
48  
49  
50  
51  
52  
53  
54  
55  
56  
57  
58  
59  
60

1  
2  
3 services. This is used to identify new knowledge about the structure, processes, and effect of health  
4 systems for individuals and populations[6]. This is the first systematic review to provide a summary of  
5 all health system interventions provided in recovery, and their impact on patient outcomes after  
6 recovery room discharge. In presenting these finding, we hope to highlight the need for further  
7 research to help improve the care of patients in the post-operative period.  
8  
9  
10  
11  
12

### 13 **Objectives**

14  
15 The objective of this systematic review was to investigate any health system initiatives undertaken in  
16 operating suite recovery rooms, in the post-operative period, that have been shown to improve  
17 outcomes after PACU discharge, for adult, non-cardiac surgical patients. Important outcomes included  
18 mortality, morbidity, return to theatre, unplanned ICU admission and length of hospital stay.  
19 Prospective and retrospective randomised control trials, cohort studies, case control studies and  
20 comparison studies were included for analysis.  
21  
22  
23  
24  
25

### 26 **METHODS**

#### 27 **Protocol and registration**

28  
29 A review protocol was developed in line with the Preferred Reporting of Observational Studies and  
30 Meta-Analysis (PRISMA) statement by the author team prior to commencing the systematic review.  
31 This protocol is registered on the International Prospective Register of Systematic Reviews  
32 (PROSPERO) database, registration number CRD42018106093.  
33  
34  
35  
36  
37  
38

#### 39 **Patient and Public Involvement**

40  
41 As this is a systematic review of pre-existing literature, patients and the public were not involved in  
42 study design. However, this systematic review forms part of a broader research topic on post-  
43 operative care, and how to face the challenge of increasing post-operative complication rates. In 2012,  
44 the WHO estimated the global volume of surgery to be 312.9 million operations, an increase of 38.2%  
45 compared to 2004, resulting in a mean global surgical rate of 4469 operations per 100 000 people per  
46 year [7]. With an ageing population and increasing prevalence of comorbidities, post-operative  
47 complications are now at pandemic levels [8]. Investigating alternative health care systems and care  
48 delivery models is paramount to combatting this issue. It should be apriority of both patients and  
49 service providers, as it has the potential to provide great benefit to the broader population.  
50  
51  
52  
53  
54  
55  
56

#### 57 **Eligibility criteria**

1  
2  
3 Included studies investigated health system initiatives in the PACU, in the post-operative period, up  
4 to 48 hours post-operatively. Adult patient groups were the primary focus, however, studies that  
5 included a small cohort of children were not automatically excluded. Studies that explored the  
6 relationship between interventions in recovery and mortality, morbidity, hospital length of stay,  
7 unplanned ICU admission and return to theatre were included. Varying study designs were eligible for  
8 inclusion; such as randomised control trials, cohort studies, case control studies and before and after  
9 studies. Cross-sectional studies and case reports were excluded. Only studies published from 1990  
10 onwards were included, to focus on up to date clinical practice, and minimise the inclusion of  
11 irrelevant data. Studies published in a language other than English, grey literature and studies  
12 focussing solely on ambulatory surgery were excluded.  
13  
14  
15  
16  
17  
18  
19  
20  
21

### 22 **Information sources and search strategy**

23 Medical Subject Headings (MeSH) terms were generated from the NCBI PubMed advanced search area  
24 with the assistance of the University of Adelaide Health Sciences librarian. Logic grids were used as a  
25 tool, to replicate the search throughout the three databases; NCBI PubMed, EMBASE, and Cumulative  
26 Index to Nursing and Allied Health Literature (CINAHL). The full electronic search strategy for the  
27 PubMed database is presented in Appendix 1. This search strategy was utilized across the three  
28 databases from 23/3/18 to 8/4/18 to yield the articles screened for inclusion in the review.  
29  
30  
31  
32  
33  
34

### 35 **Study selection**

36 Search results from each data base were recorded, and imported into EndNote 8 (Clarivate Analytics,  
37 Boston, USA). Key word searching was also performed to identify new studies that had not yet been  
38 assigned indexing terms for the databases. Reference lists from key articles were also reviewed to  
39 identify further papers that may have been relevant to the review. Titles and abstracts were screened  
40 by one reviewer (CL), who was not blinded to journal titles or to the study authors or institutions.  
41 Articles selected for full text review were reviewed by two reviewers (CL and GL), and any  
42 discrepancies arising regarding the relevance of a study were resolved by consulting a third party. The  
43 list of references for inclusion was sent to all authors to ensure consensus.  
44  
45  
46  
47  
48  
49  
50  
51

### 52 **Data collection process**

53 The Cochrane Data Extraction Template for Included Studies from their consumers and  
54 communication page, was used as a base for our data extraction form. This form was piloted on two  
55 initial studies for usability, with no further modifications required. One reviewer extracted the initial  
56 data from each study (CL), and this data was confirmed by a second reviewer (GL) before inclusion in  
57  
58  
59  
60

1  
2  
3 the review. One study only included data in pictorial form, and an attempt was made to contact the  
4 authors to obtain the raw data. Unfortunately, this was unsuccessful.  
5  
6  
7

### 8 **Data items**

9  
10 Data items extracted from each study included patient population and characteristics, intervention  
11 aims and methods, comparison groups and outcome measures. These data items are presented in the  
12 Characteristics of Included Studies Tables.  
13  
14  
15

### 16 **Risk of bias in individual studies**

17  
18 Risk of bias in individual studies was assessed by two reviewers (CL and GL) using Gate-Lite and Robins-  
19 I (previously known as A Cochrane Risk of Bias Assessment Tool: for Non-Randomized Studies of  
20 Interventions (ACROBAT-NRSI)). Narrative synthesis of data placed more weight on higher quality  
21 studies, however, all studies and their results are presented, with caveats to highlight the individual  
22 biases that will affect interpretations of results.  
23  
24  
25  
26  
27

### 28 **Summary measures and planned methods of analysis**

29  
30 Narrative synthesis of data was the principle summary measure. This was due to the differing study  
31 designs and variable outcome measures in each study. Meta-analysis was not appropriate for the data  
32 in this systematic review. All data is presented individually, in relation to each study, with further  
33 narrative synthesis to summarise results. Results from studies were unable to be combined due to the  
34 variation in primary and secondary outcome measures, and differences in study design. No additional  
35 analysis or subgroup analysis was performed during this systematic review.  
36  
37  
38  
39  
40  
41

### 42 **Risk of bias across studies**

43  
44 Risk of bias across studies was assessed by two reviewers (CL and GL), using the Cochrane Risk of Bias  
45 Tool, and discussing any evident publication bias or selective reporting.  
46  
47

## 48 **RESULTS**

### 49 **Study selection**

50  
51 Database results, and numbers of studies screened are presented in the flow diagram (Figure 1). All  
52 references were imported into EndNote 8 for title and abstract screening. One reviewer (CL)  
53 screened all titles and abstracts, with ambiguous studies included for full text review. 14 studies  
54 were selected for full text review. Full text reviews were completed by two reviewers (CL and GL),  
55  
56  
57  
58  
59  
60

and 8 studies were selected for inclusion in the review. A summary of included and excluded studies was sent to the third and fourth authors for consensus.

### Study characteristics

Of the eight studies included, four of the included studies were retrospective cohort studies[9-12], two were observational cohort studies[13, 14], one was a prospective non-randomised pre-post intervention study[15], and one was a prospective randomised cohort study[16]. Study characteristics for each of the included studies are outlined in the Characteristics of Included Studies Summary Table (Table 1). Four studies investigated the use of PACU as a non-ICU pathway for post-operative patients[9, 11, 13, 14]. Two investigated the implementation of physiotherapy in PACU, and the impact on patient outcomes[12, 16]. One evaluated the use of a new nursing scoring tool, and its impact on recognition of patient deterioration in PACU[15], and one evaluated the implementation of a two-track clinical pathway in PACU, and the effect on patient outcomes[10]. All studies focussed primarily on adults, but one included small cohort of children[11]. Common outcome measures included in-hospital mortality, PACU length of stay and hospital length of stay. Further details regarding patient population characteristics, study methodology and outcome measures are also outlined in the supplementary tables published online (supplementary file).

**Table 1. Characteristics of Included Studies Summary Table**

| Source                                     | Aim                                                                                                                                                                               | Study Design                                                    | Number of arms/groups                                                                                                                                      | Population                                                                                                                            | Intervention                                                                                                                    | Comparison group                                                        | Outcome measures                                                                                      |
|--------------------------------------------|-----------------------------------------------------------------------------------------------------------------------------------------------------------------------------------|-----------------------------------------------------------------|------------------------------------------------------------------------------------------------------------------------------------------------------------|---------------------------------------------------------------------------------------------------------------------------------------|---------------------------------------------------------------------------------------------------------------------------------|-------------------------------------------------------------------------|-------------------------------------------------------------------------------------------------------|
| Callaghan, Lynch et al. 2005 (n= 178)      | To determine the safety of introducing non-ICU pathways for selected patients. And evaluate the effect on cost, ICU beds availability and cancellation rates of elective surgery. | Retrospective cohort study.                                     | Intervention group: patients selected for overnight intensive recovery. Comparison group: patients booked for an elective ICU admission.                   | All patients undergoing elective open aortic surgery between 1/01/98 and 31/12/02.                                                    | (n= 152)<br>Introduction of OIR (Overnight Intensive Recovery)                                                                  | (n= 26)<br>Elective post-operative ICU bed                              | In hospital mortality<br>In hospital morbidity<br>Post-operative length of stay<br>ICU length of stay |
| Eichenberger, Haller et al. 2011 (n= 6375) | To assess the impact of a clinical pathway implemented in a post-anaesthesia care unit on post-operative outcomes.                                                                | Retrospective cohort study based on electronic patient records. | Fast track: nurse driven, ASA 1-2.<br>Slow track: physician driven, ASA 3-5 who have undergone minor or major surgery, or developed post-op complications. | All elective and non-elective inpatients, who underwent a surgical or endoscopic procedure under anaesthesia during the study period. | (n= 3345)<br>Introduction of a two-track clinical pathway that clearly defined & coordinated medical and nursing interventions. | (n= 3030)<br>Pre-existing PACU conditions without the clinical pathway. | PACU length of stay<br>In-hospital mortality<br>Unplanned ICU admissions after PACU stay.             |

1  
2  
3  
4  
5  
6  
7  
8  
9  
10  
11  
12  
13  
14  
15  
16  
17  
18  
19  
20  
21  
22  
23  
24  
25  
26  
27  
28  
29  
30  
31  
32  
33  
34  
35  
36  
37  
38  
39  
40  
41  
42  
43  
44  
45  
46  
47  
48  
49  
50  
51  
52  
53  
54  
55  
56  
57  
58  
59  
60

|                                                  |                                                                                                                                                                                                                   |                                                         |                                                                                                                                                      |                                                                                                                 |                                                                        |                                                                     |                                                                                                                                                 |
|--------------------------------------------------|-------------------------------------------------------------------------------------------------------------------------------------------------------------------------------------------------------------------|---------------------------------------------------------|------------------------------------------------------------------------------------------------------------------------------------------------------|-----------------------------------------------------------------------------------------------------------------|------------------------------------------------------------------------|---------------------------------------------------------------------|-------------------------------------------------------------------------------------------------------------------------------------------------|
|                                                  |                                                                                                                                                                                                                   |                                                         | Comparison group: Pre-existing PACU conditions without the clinical pathway.                                                                         |                                                                                                                 |                                                                        |                                                                     |                                                                                                                                                 |
| Fraser and Nair 2016<br>(n= 119)                 | To assess if elective surgical patients were stable enough to return to the general ward after a stay in Extended Recovery instead of being routinely admitted to ICU                                             | Observational cohort study.                             | One arm. No control group                                                                                                                            | Elective surgical patients who would have previously been booked for level 2 care post-operatively.             | (n= 119)<br><br>Opening of an extended recovery unit.                  | Nil                                                                 | Discharge destination after extended recovery unit admission                                                                                    |
| Kastrup, Seeling et al. 2012<br>(n= 51090)       | To evaluate the effect of around-the-clock intensivist PACU coverage on the structure of ICU, and to demonstrate the economic effect on the hospital.                                                             | Retrospective cohort study.                             | Intervention group: after the introduction of 24-hour intensivist coverage. Comparison group: prior to introduction of 24-hour intensivist coverage. | All patients undergoing a surgical procedure (adults and children) between 1/01/08 – 30/04/11.                  | (n= 26118)<br><br>Introduction of 24-hour intensivist coverage in PACU | (n= 24972)<br><br>Pre-existing PACU with no intensivist coverage    | PACU LOS<br>ICU LOS<br>Pre-operative days<br>Hospital LOS<br>Case mix index<br>Cost                                                             |
| Schweizer, Khatchaturian et al. 2002<br>(n= 933) | To assess the impact of a new PACU on ICU utilisation, hospital length of stay and complications following major non-cardiac surgery.                                                                             | Observational cohort study.                             | Intervention group: after opening of a new PACU. Control group: before opening of the new PACU                                                       | Adult patients undergoing abdominal aortic reconstruction or resection of lung cancer during the study periods. | (n= 485)<br><br>Opening of a new PACU (post-anaesthesia care unit)     | (n= 448)<br><br>Pre-existing PACU                                   | Mortality<br>Reoperation<br>Secondary admission to ICU<br>Post-operative complications<br>Hospital LOS                                          |
| Street, Phillips et al. 2017<br>(n= 1417)        | To evaluate whether use of a discharge criteria tool for nursing assessment of patients in PACU would enhance nurses' recognition and response to patients at-risk of deterioration and improve patient outcomes. | Prospective non-randomised pre-post intervention study. | Intervention group: after the implementation of the Post-Anaesthetic Care Tool (PACT) Comparison group: prior to the implementation of PACT.         | All adult patients undergoing elective surgery on days of data collection.                                      | (n= 694)<br><br>Implementation of a Post Anaesthesia Care Tool (PACT)  | (n= 723)<br><br>Standard PACU care without PACT                     | Nursing management of symptoms<br>Rates of adverse events<br>Mortality<br>PACU LOS<br>Hospital LOS<br>Health service usage and healthcare costs |
| Tayrose, Newman et al. 2013<br>(n= 900)          | To address the impact of rapid rehabilitation beginning in the recovery room on length-of-                                                                                                                        | Retrospective cohort study.                             | Intervention group: rapid rehabilitation group. Comparison group: standard                                                                           | 900 consecutive hip and knee arthroplasty patients                                                              | (n= 331)<br><br>Rapid rehabilitation pilot program where the first     | (n= 569)<br><br>Remainder of cases received standard rehabilitation | Overall hospital LOS<br>Hip arthroplasty subgroup LOS<br>Knee                                                                                   |



1  
2  
3  
4  
5  
6  
7  
8  
9  
10  
11  
12  
13  
14  
15  
16  
17  
18  
19  
20  
21  
22  
23  
24  
25  
26  
27  
28  
29  
30  
31  
32  
33  
34  
35  
36  
37  
38  
39  
40  
41  
42  
43  
44  
45  
46  
47  
48  
49  
50  
51  
52  
53  
54  
55  
56  
57  
58  
59  
60

|                                    |                                                                                                                                                                                          |                                     |                                                                                                                                                                      |                                                                                      |                                                                     |                                                                            |                                                                        |
|------------------------------------|------------------------------------------------------------------------------------------------------------------------------------------------------------------------------------------|-------------------------------------|----------------------------------------------------------------------------------------------------------------------------------------------------------------------|--------------------------------------------------------------------------------------|---------------------------------------------------------------------|----------------------------------------------------------------------------|------------------------------------------------------------------------|
|                                    | stay after primary hip and knee arthroplasty.                                                                                                                                            |                                     | rehabilitation protocol                                                                                                                                              |                                                                                      | two cases of the day were mobilised in the recovery room.           | protocol starting on the morning of post-operative day one.                | arthroplasty subgroup LOS                                              |
| Zoremba, Dette et al. 2009 (n= 60) | To evaluate the impact of short-term respiratory physiotherapy during the PACU stay, on postoperative lung function tests and pulse oximetry values in obese adults after minor surgery. | Prospective randomised cohort study | Intervention group: physical therapy treatment group that performed incentive spirometry in the PACU<br>Control group: patients who did not undergo physical therapy | 60 obese adult patients (BMI 30-40) ASA 2-3, scheduled for minor peripheral surgery. | (n= 30)<br><br>Patients performed incentive spirometry in the PACU. | (n= 30)<br><br>Not instructed to do any breathing exercises or spirometry. | Pulse oximetry and spirometry at 1, 2, 6 and 24 hours post-operatively |

**Risk of bias within studies**

The overall risk of bias within studies was serious. Critical risk of bias was identified in two studies[12, 13], serious risk of bias in three studies[9, 14, 15], moderate risk of bias in one study[11] and low risk of bias in two studies[10, 16]. Significant patient selection and allocation bias was the most common identified cause[9, 11, 12, 14, 15]; as patients in these studies were not randomly allocated to their post-operative level of care. The most clinically unwell patients were sent to ICU automatically, and only the lower risk patients, as deemed by the treating teams, were allowed a trial of care in the PACU. The relatively small numbers of participants in each study, with the exception of Kastrup et al, also introduces a significant risk of bias; as these studies were not adequately powered to assess critical outcomes such as mortality, and other serious post-operative complications. Articles that were considered as being of serious and critical risk of bias, were still included in the review, due to the sparse literature available. The risk of bias summary table (Table 2) provides further analysis, and comment regarding the risk of bias within individual studies.

**Table 2. Risk of Bias Summary Table**

| <i>Source</i> | <i>Bias Due to Confounding</i> | <i>Bias in Selection &amp; Allocation of Participants</i> | <i>Bias in Measurement of Interventions</i> | <i>Bias Due to Departures from Intended Interventions</i> | <i>Bias Due to Missing Data</i> | <i>Bias in Measurement of Outcomes</i> | <i>Bias in Selection of Reported Results</i> | <i>Overall Risk of Bias Judgement</i> | <i>Comments</i> |
|---------------|--------------------------------|-----------------------------------------------------------|---------------------------------------------|-----------------------------------------------------------|---------------------------------|----------------------------------------|----------------------------------------------|---------------------------------------|-----------------|
|---------------|--------------------------------|-----------------------------------------------------------|---------------------------------------------|-----------------------------------------------------------|---------------------------------|----------------------------------------|----------------------------------------------|---------------------------------------|-----------------|



1  
2

|                                                                                                                |                                             |          |          |          |          |          |          |          |          |                                                                                                                                                                                                                                                                                      |
|----------------------------------------------------------------------------------------------------------------|---------------------------------------------|----------|----------|----------|----------|----------|----------|----------|----------|--------------------------------------------------------------------------------------------------------------------------------------------------------------------------------------------------------------------------------------------------------------------------------------|
| 3<br>4<br>5<br>6<br>7<br>8<br>9<br>10<br>11<br>12<br>13<br>14                                                  | Callaghan,<br>Lynch et al.<br>2005          | Low      | Serious  | Low      | Moderate | Low      | Moderate | Low      | Serious  | Significant selection bias of lower risk patients who were sent to OIR. Used predictive values for mortality (based on POSSUM variables) as a comparison measure.                                                                                                                    |
| 15<br>16<br>17<br>18<br>19                                                                                     | Eichenberger,<br>Keller et al.<br>2011      | Low      | High quality study. No specific concerns from review authors.                                                                                                                                                                                                                        |
| 20<br>21<br>22<br>23<br>24<br>25<br>26<br>27                                                                   | Fraser and Nair<br>2016                     | Low      | Moderate | Moderate | Moderate | Critical | Serious  | Moderate | Critical | Over 25% of data missing. No clear objective stated, no explanation of methodology. Poorly defined selection criteria.                                                                                                                                                               |
| 28<br>29<br>30<br>31<br>32<br>33<br>34<br>35<br>36<br>37<br>38<br>39<br>40<br>41                               | Kastrup,<br>Seeling et al.<br>2012          | Low      | Serious  | Low      | Moderate | Low      | Low      | Low      | Moderate | Significant selection bias of patients allocated to PACU, intermediate care unit or ICU by intensive care physician. This study also included a population of children (numbers not given).                                                                                          |
| 42<br>43<br>44<br>45<br>46<br>47<br>48<br>49<br>50<br>51<br>52<br>53<br>54<br>55<br>56<br>57<br>58<br>59<br>60 | Schweizer,<br>Khatchatourian<br>et al. 2002 | Critical | Serious  | Low      | Low      | Low      | Low      | Low      | Serious  | Introduction of preoperative risk assessment guidelines (AHA/ACC) with increased antiadrenergic administration pre-operatively confounds results. Significant selection bias, no admission criteria stated for PACU or ICU. Patient allocation was determined by treating clinician. |

1  
2  
3  
4  
5  
6  
7  
8  
9  
10  
11  
12  
13  
14  
15  
16  
17

18  
19  
20  
21  
22  
23  
24  
25  
26  
27  
28  
29  
30  
31  
32

33  
34  
35  
36  
37  
38

39  
40  
41  
42  
43  
44  
45  
46  
47  
48  
49  
50  
51  
52  
53  
54  
55  
56  
57  
58  
59  
60

|                              |     |          |         |          |     |         |          |          |                                                                                                                                                                                                                                             |
|------------------------------|-----|----------|---------|----------|-----|---------|----------|----------|---------------------------------------------------------------------------------------------------------------------------------------------------------------------------------------------------------------------------------------------|
| Street, Phillips et al. 2017 | Low | Serious  | Low     | Moderate | Low | Serious | Critical | Serious  | Power analysis included all patients (including day surgery) when investigating post-operative outcomes after PACU discharge, giving inaccurate results. Poor objective (with different objectives stated in the abstract and the article). |
| Rayrose, Newman et al. 2013  | Low | Critical | Serious | Moderate | Low | Serious | Low      | Critical | Patients who were deemed too unwell to be mobilised in recovery, were included in analysis for the standard recovery group. Operative order bias, by including the first two cases of the day. No methods reported for data collection.     |
| Zoremba, Dette et al. 2009   | Low | Low      | Low     | Low      | Low | Low     | Low      | Low      | Good quality study. However, does not address the longer-term outcomes of interest.                                                                                                                                                         |

**Results of individual studies**

The results of each individual study are presented in the results of included study table (Table 3). Four studies[9, 11, 13, 14] investigated non-ICU pathways for care of post-operative patients, and these pathways were not associated with increased mortality rates in three of the included studies[9, 11, 14]. However, it must be noted that due to sample size, only one study [11] was adequately powered to show a reliable difference in mortality rates, and one study[13] did not investigate mortality as an outcome measure. Admission criteria for PACU care instead of ICU care post-operatively were only stated in two of the included studies[9, 11]. Callaghan et al outlined contraindications to use of Overnight Intensive Recovery; including significantly impaired renal function, technically difficult or prolonged surgery expected, poor exercise tolerance or likelihood of requiring post-operative ventilation. However, the selection of patients was ultimately at the discretion of the attending

1  
2  
3 anaesthetist and vascular surgeon. Kastrup et al only listed planned length of stay <24 hours as their  
4 admission criteria to PACU instead of ICU or the intermediate care unit. Fraser et al did not mention  
5 their admission criteria for extended recovery care[13], and Schweizer et al admitted patients to PACU  
6 instead of ICU purely at the discretion of the attending anaesthetist[14]. Four of eight studies also  
7 examined hospital length of stay [9, 11, 12, 14], and two found the intervention was associated with  
8 decreased length of stay and two found no association (Table 3). Kastrup et al demonstrated a  
9 significant decrease in length of stay for all surgical patients after their introduction of 24-hour  
10 intensivist coverage to the PACU [11]. Tayrose et al, also demonstrated a decreased length of stay for  
11 patients who received early mobilisation in PACU[12]. However, Callaghan et al and Schweizer et al  
12 did not demonstrate any statistically significant decrease in length of stay[9, 14]. PACU length of stay  
13 was another common outcome measure in three of the included studies[10, 11, 15]. Eichenberger et  
14 al demonstrated a decreased PACU length of stay for ASA 1-2 patients, but no difference for ASA3-5,  
15 while Kastrup et al and Street both demonstrated an increase in PACU length of stay following their  
16 interventions[11, 15]. Due to the variations in study designs, we were unable to combine the data for  
17 further aggregate analysis.  
18  
19  
20  
21  
22  
23  
24  
25  
26  
27  
28  
29

30 **Table 3. Results of Included Studies**

| 31 Source                                 | 32 Intervention                                                                                                                    | 33 Mortality                                                                                                                                                                                                        | 34 Other Key results                                                                                                                                                                                                                                                                                                                                                                                                                                                                                                                                                                                                                                                                                                                                                       |
|-------------------------------------------|------------------------------------------------------------------------------------------------------------------------------------|---------------------------------------------------------------------------------------------------------------------------------------------------------------------------------------------------------------------|----------------------------------------------------------------------------------------------------------------------------------------------------------------------------------------------------------------------------------------------------------------------------------------------------------------------------------------------------------------------------------------------------------------------------------------------------------------------------------------------------------------------------------------------------------------------------------------------------------------------------------------------------------------------------------------------------------------------------------------------------------------------------|
| 35 Callaghan, Lynch et al.<br>36 2005     | 37 Introduction of OIR<br>(Overnight Intensive<br>38 Recovery)                                                                     | 39 No significant difference<br>between groups. Overall in<br>hospital mortality was 2%.<br>fewer than predicted<br>patients died (observed<br>mortality 3 versus predicted<br>95% CI 8-21).                        | 40 Morbidity: No significant difference between groups. Overall, fewer<br>than predicted patients experienced one or more complications<br>(observed 101 versus predicted morbidity 103-125 95%CI)<br>Hospital length of stay: No significant difference between groups                                                                                                                                                                                                                                                                                                                                                                                                                                                                                                    |
| 41 Eichenberger, Haller et al.<br>42 2011 | 43 Introduction of a two-<br>track clinical pathway<br>that clearly defined &<br>coordinated medical and<br>nursing interventions. | 44 Overall in-hospital mortality<br>decreased significantly from<br>68 patients (1.5%) to 39<br>patients (0.8%) (P<0.001). In<br>ASA 3-5 patients, mortality<br>was nearly halved (adjusted<br>OR 0.40) (P< 0.001). | 45 Unplanned ICU admission: Total number of unplanned ICU<br>admissions after stay in PACU decreased from 113 (2.5%) to 90<br>(1.9%) (adjusted OR 0.70) (P=0.70)<br>PACU length of stay: After adjustment for differences in patients<br>and procedures. Statistically significant decrease in PACU length of<br>stay for ASA 1-2 patients (adjusted P< 0.001). There was no<br>difference for ASA 3-5 patients (adjusted P= 0.768)                                                                                                                                                                                                                                                                                                                                        |
| 46 Fraser and Nair 2016                   | 47 Opening of an extended<br>recovery unit.                                                                                        | 48 Not investigated                                                                                                                                                                                                 | 49 Discharge destination after extended recovery unit admission: Data<br>from the first 119 patients admitted to the Extended Recovery unit<br>were collected. 76 patients (63.9%) who would have otherwise gone<br>to critical care were able to go back to the ward.                                                                                                                                                                                                                                                                                                                                                                                                                                                                                                     |
| 50 Kastrup, Seeling et al. 2012           | 51 Introduction of 24-hour<br>intensivist coverage in<br>PACU                                                                      | 52 No difference between<br>groups                                                                                                                                                                                  | 53 Hospital length of stay: Overall length of stay decreased significantly<br>for all surgical patients. From 8.3 (+/- 11.8) days to 7.71 (+/- 10.99)<br>days.<br>PACU length of stay: More patients were treated in the PACU for a<br>longer period of time. Mean LOS increased from 0.27 (+/- 0.2) days<br>to 0.45 (+/- 0.41) days<br>Cases treated in ICU: Mean number of cases treated in the ICU per<br>month decreased significantly from 164.7 (+/- 14.37) to 133.8 (+/-<br>19.42) (P<0.001)<br>ICU treatment days: Mean number of treatment days per month did<br>not change. Relative number of patients with longer LOS (>7 days)<br>increased after introduction of PACU, whereas average number of<br>patients staying <24 hours in the ICU decreased by ~50%. |

|                                       |                                                                                                              |                                           |                                                                                                                                                                                                                                                                                                                                                                                                                                                                                                                                                                                                                                                                                                                                |
|---------------------------------------|--------------------------------------------------------------------------------------------------------------|-------------------------------------------|--------------------------------------------------------------------------------------------------------------------------------------------------------------------------------------------------------------------------------------------------------------------------------------------------------------------------------------------------------------------------------------------------------------------------------------------------------------------------------------------------------------------------------------------------------------------------------------------------------------------------------------------------------------------------------------------------------------------------------|
| Schweizer, Khatchatourian et al. 2002 | Opening of a new PACU (post-anaesthesia care unit)                                                           | No difference between study periods       | Morbidity: Vascular patients had decreased rates of myocardial infarction (6.4% vs 1.3% p=0.009) and decreased rates of pulmonary oedema (5.1% vs 1.7% p=0.08)<br>Re-operation: No difference between study periods<br>Hospital length of stay: Total hospital length of stay did not change over time                                                                                                                                                                                                                                                                                                                                                                                                                         |
| Street, Phillips et al. 2017          | Implementation of a Post Anaesthesia Care Tool (PACT)                                                        | No significant difference between groups. | Patient management in PACU: More requests for medical review 19% vs 30% (P=<0.001), more patients with MET criteria modified by an anaesthetist 6.5% vs 13.8% (P<0.001), higher rates of analgesia administration 37.3% vs 54.2% (P=0.001).<br>Adverse events in PACU: More adverse events recorded in PACU in phase 2, 29.4% vs 21.2% (P<0.001). May represent a greater recognition of adverse events in PACU after implementation of PACT.<br>Adverse events after PACU: Significant decrease in rates of clinical deterioration and significant decrease in cardiovascular events after PACU discharge.<br>PACU length of stay: Increase in median PACU length of stay from 45min in phase 1 to 53min in phase 2 (P<0.001) |
| Tayrose, Newman et al. 2013           | Rapid rehabilitation pilot program where the first two cases of the day were mobilised in the recovery room. | Not investigated                          | Overall hospital length of stay: Rapid rehabilitation had significantly decreased length of stay that patient who began therapy on post-op day 1 (P<0.001).<br>Hip arthroplasty subgroup length of stay: Decreased length of stay for rapid rehab patients in the hip arthroplasty subgroup (P<0.001).<br>Knee arthroplasty subgroup length of stay: Decreased LOS for rapid rehab patients in the knee arthroplasty subgroup (P=0.16).                                                                                                                                                                                                                                                                                        |
| Zoremba, Dette et al. 2009            | Patients performed incentive spirometry in the PACU.                                                         | Not investigated                          | Pulse oximetry: Significantly improved pulse oximetry values at 1 and 2 hours in PACU, and at 6 hours post mobilisations (P<0.0001), and significant improvement in pulse oximetry values at 24 hours post-op (P<0.0001).<br>Spirometry results: Incentive spirometry group recovered lung function faster in during the PACU stay (P<0.0001). Lung function had almost reached baseline at 6 hours in the incentive spirometry group, however the control group were up to 25% below baseline (P<0.0001). Overall difference in lung function between groups had decreased 24 hours after surgery, but significant differences still remained (P=0.0040).                                                                     |

### Synthesis of results

The overall quality of studies was poor, with significant selection and allocation bias; however, managing post-operative patients outside of the ICU is not associated with worse patient outcomes, especially in an extended recovery setting. There was no increase in mortality rates identified in three of the studies investigating non-ICU pathways for post-operative patients[9, 11, 14], and the fourth did not investigate mortality as an outcome measure[13]. Use of extended recovery also meant that ward discharge was usual, bypassing the ICU[9, 13]. Kastrup et al showed that the addition of intensivist coverage to PACU was associated with decreased length of hospital stay, and Tayrose et al demonstrated that early mobilisation in PACU was associated with decreased length of hospital stay, but significant pre-selection bias for early mobilisation of arthroplasty patients confounds results[12]. Other changes to the PACU environment, including the opening of a new PACU[14] and introduction of Overnight Intensive Recovery[9] did not appear to have any effect on hospital length of stay. The use of a two-track pathway for nurse-driven and physician-driven PACU management and discharge appears to be beneficial in reducing PACU length of stay, and improving outcomes after discharge

1  
2  
3 from PACU, including a significant decrease in post-operative mortality[10]. However, introduction of  
4 a Post Anaesthetic Care Tool, and introduction of 24-hour intensivist coverage in PACU was associated  
5 with increased length of stay in PACU[11, 15]. While incentive spirometry in PACU did improve pulse  
6 oximetry values and lung function for the first 24 hours post-operatively, there were no long-term  
7 positive effects investigated, or identified[16]. It must be noted that the risk of bias of the included  
8 studies modifies results. Critical risk of bias was identified in two studies[12, 13], serious risk of bias in  
9 three studies[9, 14, 15], moderate risk of bias in one study[11] and low risk of bias in two studies[10,  
10 16]. Only one of the included studies was adequately powered[11], and reliable conclusions cannot  
11 be drawn from single studies with such small datasets.  
12  
13  
14  
15  
16  
17  
18  
19

### 20 **Risk of bias across studies and additional analyses**

21 Risk of bias across studies for the key common outcome measures of mortality, hospital length of stay  
22 and PACU length of stay was high due to the study designs, with no level I or II evidence available.  
23 There was no additional analysis required for this review.  
24  
25  
26  
27

## 28 **DISCUSSION**

### 29 **Summary of evidence**

30 Of the eight studies included in this systematic review, only one was a prospective randomised cohort  
31 study[16], and one was a prospective non-randomised pre-post intervention study[15]. The rest were  
32 observational and retrospective cohort studies[9-14]. There was no level I or level II evidence available  
33 for inclusion in this review. Common outcome measures identified, included mortality, hospital length  
34 of stay and PACU length of stay. Despite the poor quality of evidence, we found that managing  
35 selected higher risk post-operative patients in the PACU instead of ICU was not associated with worse  
36 outcomes[9, 11, 13, 14], and may be associated with decreased unnecessary ICU admissions, with  
37 potential large cost savings. However, due to study types, small participant numbers, and the  
38 significant selection and allocation bias of patients within these studies, the overall strength of  
39 evidence is only moderate. The addition of intensivist coverage to PACU was associated with decreased  
40 hospital length of stay in one study [11], as was the rapid mobilisation of arthroplasty patients[12].  
41 However, the introduction of overnight intensive recovery and the opening of a new PACU had no  
42 effect on hospital length of stay[9, 14]. The introduction of a two-track clinical pathway appeared to  
43 be associated with a decreased PACU length of stay[10], however the introduction of a Post  
44 Anaesthesia Care Tool and introduction of intensivist coverage was associated with increased PACU  
45 length of stay[11, 15]. Only one of the included studies was adequately powered [11], and we are  
46 unable to draw accurate conclusions from single studies with such small participant numbers. This has  
47  
48  
49  
50  
51  
52  
53  
54  
55  
56  
57  
58  
59  
60

1  
2  
3 significant implications for future research and health resource allocation. Further studies that  
4 prospectively randomly allocate patients to a treatment arm would be of great value, however, we  
5 acknowledge that due to the risk profile and care requirements of surgical patients, this may not be  
6 possible until further safety is proven.  
7  
8  
9

### 10 11 **Limitations**

12 The protocol development and search strategy for this review were developed in accordance with the  
13 PRISMA statement. With help from experienced health science research librarians, we attempted to  
14 ensure that all references were captured; however, it is possible that studies were missed. Due to the  
15 variation in study design and primary outcome measures, we were unable to combine data for  
16 aggregate analysis or meta-analysis. The narrative synthesis of key results may introduce bias;  
17 however, steps were taken to minimise this, including the review of all data by a second author. The  
18 most significant limitation of this systematic review, was the high risk of bias within the individual  
19 studies included in the review. Selection and allocation bias, missing data, inclusion of inappropriate  
20 patient groups such as day surgery, and lack of fidelity assessment were some of the key flaws within  
21 each study. However, the thorough risk of bias assessment and its implications on reported results  
22 allows readers to interpret the data appropriately.  
23  
24  
25  
26  
27  
28  
29  
30  
31  
32

### 33 **Conclusions**

34 Managing selected post-operative patients in PACU instead of ICU does not appear to be associated  
35 with worse patient outcomes, however due to study design, and the high risk of bias within studies,  
36 the strength of evidence is moderate at best. The addition of intensivist coverage to PACU and early  
37 mobilisation was associated with decreased hospital length of stay. While the use of a two-track  
38 clinical pathway decreased PACU length of stay, however there is no evidence of this improving  
39 patients' overall outcomes. This is the first systematic review to investigate the health system  
40 initiatives undertaken in recovery rooms, and their impact on patient outcomes after PACU discharge.  
41 There is a striking paucity of literature on this topic, with very few high-quality studies; and further  
42 research is required to evaluate and improve the care of post-operative patients in the recovery room  
43 setting.  
44  
45  
46  
47  
48  
49  
50  
51  
52

### 53 **FUNDING**

54 This systematic review was undertaken as part of a Masters of Clinical Sciences with the University of  
55 Adelaide, funded by the Australian Government's Research Training Program (Commonwealth  
56 funded).  
57  
58  
59  
60

## COMPETING INTERESTS

No conflicts of interest known at the time of writing the review. Affiliations; The Royal Adelaide Hospital and the University of Adelaide.

## AUTHOR STATEMENT

CL developed the review protocol, completed all title and abstract screening, full text reviews and data analysis. She completed the risk of bias assessment with GL. CL also drafted and revised the manuscript. GL developed the initial review question, and assisted writing the review protocol. He also completed the full text reviews, reviewed all data of included studies and completed the risk of bias assessment with CL. He also critically appraised the draft manuscript. DS assisted with developing the initial review question, and reviewed all included articles for consensus. He also critically appraised the draft manuscript, and assisted with revisions. GM reviewed all included articles for consensus, and critically appraised the manuscript. All authors have given final approval for publication. There were no other contributors.

## DATA SHARING STATEMENT

There was no new data produced by this research. Data extracted from the original studies is available in the online supplementary tables.

## FIGURE LEGEND

Figure 1: Flow diagram for selection of studies included in review

## REFERENCES

1. Zuck, D., *Anaesthetic and Postoperative Recovery Rooms. Some notes on their early history.* Anaesthesia, 1995. **50**: p. 435-438.
2. Aps, C., *Surgical critical care: the Overnight Intensive Recovery (OIR) concept.* Br J Anaesth, 2004. **92**(2): p. 164-6.
3. Swart, M., J.B. Carlisle, and J. Goddard, *Using predicted 30 day mortality to plan postoperative colorectal surgery care: a cohort study.* Br J Anaesth, 2017. **118**(1): p. 100-104.
4. Bellomo, R., et al., *A before and after trial of the effect of a high-dependency unit on post-operative morbidity and mortality.* Crit Care Resusc, 2005. **7**(1): p. 16-21.
5. Katz, S.G. and R.D. Kohl, *Selective use of the intensive care unit after nonaortic arterial surgery.* J Vasc Surg, 1996. **24**(2): p. 235-9.
6. Institute of Medicine Committee on Health Services Research, T. and I. Work Force, in *Health Services Research: Opportunities for an Expanding Field of Inquiry: An Interim Statement*, S. Thaul, K.N. Lohr, and R.E. Tranquada, Editors. 1994, National Academies Press (US): Washington (DC).



- 1
  - 2
  - 3
  - 4
  - 5
  - 6
  - 7
  - 8
  - 9
  - 10
  - 11
  - 12
  - 13
  - 14
  - 15
  - 16
  - 17
  - 18
  - 19
  - 20
  - 21
  - 22
  - 23
  - 24
  - 25
  - 26
  - 27
  - 28
  - 29
  - 30
  - 31
  - 32
  - 33
  - 34
  - 35
  - 36
  - 37
  - 38
  - 39
  - 40
  - 41
  - 42
  - 43
  - 44
  - 45
  - 46
  - 47
  - 48
  - 49
  - 50
  - 51
  - 52
  - 53
  - 54
  - 55
  - 56
  - 57
  - 58
  - 59
  - 60
7. Weiser, T.G., et al., *An estimation of the global volume of surgery: a modelling strategy based on available data*. *Lancet*, 2008. **372**(9633): p. 139-44.
  8. Ludbrook, G., *Hidden pandemic of postoperative complications-time to turn our focus to health systems analysis*. *Br J Anaesth*, 2018. **121**(6): p. 1190-1192.
  9. Callaghan, C.J., et al., *Overnight intensive recovery: elective open aortic surgery without a routine ICU bed*. *Eur J Vasc Endovasc Surg*, 2005. **30**(3): p. 252-8.
  10. Eichenberger, A.S., et al., *A clinical pathway in a post-anaesthesia care unit to reduce length of stay, mortality and unplanned intensive care unit admission*. *Eur J Anaesthesiol*, 2011. **28**(12): p. 859-66.
  11. Kastrup, M., et al., *Effects of intensivist coverage in a post-anaesthesia care unit on surgical patients' case mix and characteristics of the intensive care unit*. *Crit Care*, 2012. **16**(4): p. R126.
  12. Tayrose, G., et al., *Rapid mobilization decreases length-of-stay in joint replacement patients*. *Bull Hosp Jt Dis* (2013), 2013. **71**(3): p. 222-6.
  13. Fraser, C. and A. Nair, *Reducing critical care admissions after elective surgery by opening an extended recovery unit at the Northern General Hospital, Sheffield*. *Anaesthesia*, 2016. **71**: p. 50.
  14. Schweizer, A., et al., *Opening of a new postanesthesia care unit: impact on critical care utilization and complications following major vascular and thoracic surgery*. *J Clin Anesth*, 2002. **14**(7): p. 486-93.
  15. Street, M., et al., *Effect of a newly designed observation, response and discharge chart in the Post Anaesthesia Care Unit on patient outcomes: a quasi-expermental study in Australia*. *BMJ Open*, 2017. **7**(12): p. e015149.
  16. Zoremba, M., et al., *Short-term respiratory physical therapy treatment in the PACU and influence on postoperative lung function in obese adults*. *Obes Surg*, 2009. **19**(10): p. 1346-54.



1  
2  
3  
4  
5  
6  
7  
8  
9  
10  
11  
12  
13  
14  
15  
16  
17  
18  
19  
20  
21  
22  
23  
24  
25  
26  
27  
28  
29  
30  
31  
32  
33  
34  
35  
36  
37  
38  
39  
40  
41  
42  
43  
44  
45  
46  
47  
48  
49  
50  
51  
52  
53  
54  
55  
56  
57  
58  
59  
60

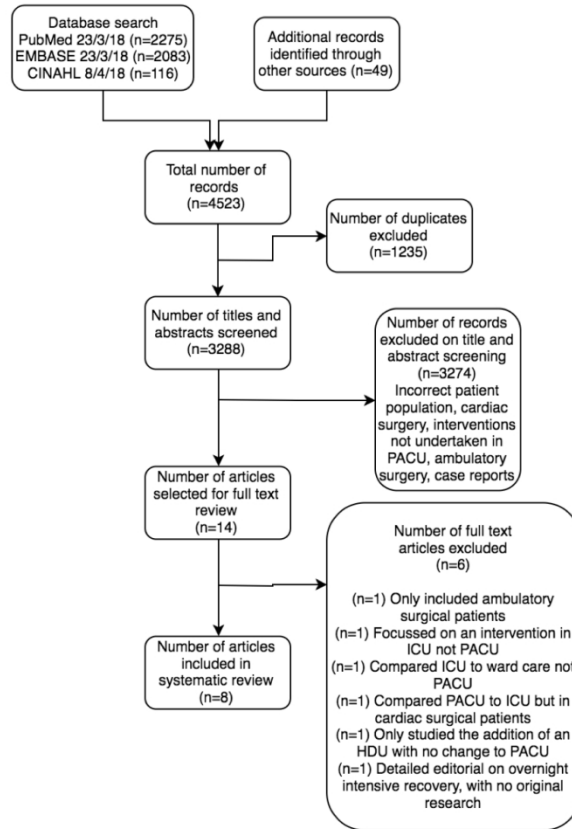

Figure 1

1  
2  
3  
4  
5  
6  
7  
8  
9  
10  
11  
12  
13  
14  
15  
16  
17  
18  
19  
20  
21  
22  
23  
24  
25  
26  
27  
28  
29  
30  
31  
32  
33  
34  
35  
36  
37  
38  
39  
40  
41  
42  
43  
44  
45  
46  
47  
48  
49  
50  
51  
52  
53  
54  
55  
56  
57  
58  
59  
60

### Appendix 1.

#### PubMed Electronic Search Strategy

| Postoperative period                                                                                                                                                                                                                                                                                                                                                                                                                                  | Adults                                                                                                                                                                      | Recovery room                                                                                                                                                                                                                                                                                                                     | Patient outcomes                                                                                                                                                                                                                                                                                                                                                                                                                                                                                                                                                                         |
|-------------------------------------------------------------------------------------------------------------------------------------------------------------------------------------------------------------------------------------------------------------------------------------------------------------------------------------------------------------------------------------------------------------------------------------------------------|-----------------------------------------------------------------------------------------------------------------------------------------------------------------------------|-----------------------------------------------------------------------------------------------------------------------------------------------------------------------------------------------------------------------------------------------------------------------------------------------------------------------------------|------------------------------------------------------------------------------------------------------------------------------------------------------------------------------------------------------------------------------------------------------------------------------------------------------------------------------------------------------------------------------------------------------------------------------------------------------------------------------------------------------------------------------------------------------------------------------------------|
| "Postoperative Period"[mh] OR Anesthesia[mh] "surgical procedures, operative"[mh] "perioperative period"[mh] "Postoperative period"[tiab] OR "post anaesthes*" [tiab] "post anesthes*" [tiab] OR postoperative[tiab] OR "Anesthesia recovery period"[tiab] OR "Anaesthesia recovery period"[tiab] OR anesthesia[tiab] OR anaesthesia[tiab] "surgical procedures"[tiab] OR surger*[tiab] operation*[tiab] operative[tiab] "perioperative period"[tiab] | "adult"[mh] OR adult*[tiab] OR elderly[tiab] OR "young adult*" [tiab] OR "young people"[tiab] OR "aged person"[tiab] OR "aged people"[tiab] OR senior*[tiab] OR frail[tiab] | OR "recovery room"[mh] OR PACU[tiab] OR "recovery room"[tiab] OR "advanced recovery room"[tiab] OR "extended recovery room"[tiab] OR "post anaesthesia care unit*" [tiab] OR anesthesia care unit*" [tiab] OR "postanaesthesia care unit*" [tiab] OR "postanesthesia care unit*" [tiab] OR "post operative recovery unit*" [tiab] | "Patient outcome assessment"[mh] OR "treatment outcome"[mh] OR mortality[mh] OR "length of stay"[mh] OR "postoperative complications"[mh] OR reoperation*[mh] OR "Patient outcome assessment"[tiab] OR "patient outcome*" [tiab] OR outcome*[tiab] OR "treatment outcome"[tiab] OR mortality[tiab] OR "fatal outcome*" [tiab] OR morbidity[tiab] OR "length of stay"[tiab] OR "postoperative complications"[tiab] OR "return to theatre"[tiab] OR complication*[tiab] OR "intensive care"[tiab] OR "intensive care admission"[tiab] OR "health outcome"[tiab] OR "adverse event*" [tiab] |

## Characteristics of Included Studies Additional Tables

### Participants additional table:

| Source                                | Location and Setting                                                                                                                                                  | Inclusion Criteria                                                                                                                                                                                                                             | Exclusion Criteria                                                                                                                                                               | Ages involved                                                                                                                      | Gender                                                                                     | Exclusion of important groups                                                                                 | Numbers involved                                       |
|---------------------------------------|-----------------------------------------------------------------------------------------------------------------------------------------------------------------------|------------------------------------------------------------------------------------------------------------------------------------------------------------------------------------------------------------------------------------------------|----------------------------------------------------------------------------------------------------------------------------------------------------------------------------------|------------------------------------------------------------------------------------------------------------------------------------|--------------------------------------------------------------------------------------------|---------------------------------------------------------------------------------------------------------------|--------------------------------------------------------|
| Callaghan, Lynch et al. 2005          | Addenbrooke's Hospital. Cambridge, United Kingdom.<br><br>Cambridge vascular unit, OIR (based in PACU) and ICU, within a major teaching hospital and research centre. | All patients undergoing elective open aortic surgery between 1/01/98 and 31/12/02.                                                                                                                                                             | Patients with missing case notes.                                                                                                                                                | Median age for all patients was 72 (66-77)                                                                                         | Intervention group: 88% males<br>Comparison group: 85% males                               | No group appears to be excluded from the study. However, some multi-morbid patients were not offered surgery. | Intervention group n=152<br>Comparison group n=26      |
| Eichenberger, Haller et al. 2011      | Geneva hospital Switzerland.<br><br>Post Anaesthesia Care Unit (PACU), within a tertiary teaching hospital.                                                           | All elective and non-elective inpatients, who underwent a surgical or endoscopic procedure under anaesthesia (including major surgery and high risk surgical patients required temporary NIV, haemodynamic support and continuous monitoring). | Exclusion: multi-trauma, persistent intraoperative shock, transplants, cardiac surgery and intra-operative respiratory failure.                                                  | Before period:<br><49yo 34.25%,<br>49-67yo 32.6%,<br>>67yo 33.3%<br>After period:<br><49yo 34.7%,<br>49-67yo 32.5%,<br>>67yo 32.8% | Intervention group: male 56.3%, female 43.7%<br>Comparison group: male 55.9%, female 44.1% | No groups excluded apart from those patients already specified in the exclusion criteria.                     | Intervention group n=3345<br>Comparison group n=3030   |
| Fraser and Nair 2016                  | Northern General Hospital Sheffield, England.<br><br>Extended recovery unit within a tertiary teaching hospital, major trauma centre.                                 | Elective surgical patients who would have previously been booked for level 2 care post-operatively. Including patients with significant comorbidities, endovascular AAA repair, carotid endarterectomy and revision arthroplasty.              | Not stated                                                                                                                                                                       | Not stated                                                                                                                         | Not stated                                                                                 | No apparent exclusion of specific population groups. Not specifically addressed.                              | Intervention group n=119                               |
| Kastrup, Seeling et al. 2012          | The Charite-University Hospital Campus Mitte Berlin, Germany. PACU within a large tertiary teaching hospital.                                                         | All patients undergoing a surgical procedure (adults and children) between 1/01/08 – 30/04/11                                                                                                                                                  | Ambulatory surgical patients, patients who were readmitted to hospital for the same reason as the initial admission (due to issues with accuracy of the administrative database) | Not given                                                                                                                          | Not stated                                                                                 | No apparent exclusion of specific population groups. Not specifically addressed.                              | Intervention group n=26118<br>Comparison group n=24972 |
| Schweizer, Khatchatourian et al. 2002 | The University Hospital of Geneva, Switzerland.<br><br>PACU within a tertiary teaching hospital.                                                                      | Adult patients undergoing abdominal aortic reconstruction or resection of lung cancer.                                                                                                                                                         | Exclusion criteria not stated                                                                                                                                                    | Not stated                                                                                                                         | Not stated                                                                                 | No apparent exclusion of specific population groups. Not specifically addressed.                              | Intervention group n= 485<br>Comparison group n= 448   |

|                                                          |                              |                                                                                                                      |                                                                                                                                                                                                                                |                                                                                                                                                                                                                                                                                                                                            |                                                                                      |                                                                                               |                                                                                                                                                                                                    |                                                    |
|----------------------------------------------------------|------------------------------|----------------------------------------------------------------------------------------------------------------------|--------------------------------------------------------------------------------------------------------------------------------------------------------------------------------------------------------------------------------|--------------------------------------------------------------------------------------------------------------------------------------------------------------------------------------------------------------------------------------------------------------------------------------------------------------------------------------------|--------------------------------------------------------------------------------------|-----------------------------------------------------------------------------------------------|----------------------------------------------------------------------------------------------------------------------------------------------------------------------------------------------------|----------------------------------------------------|
| 1<br>2<br>3<br>4<br>5<br>6<br>7                          | Street, Phillips et al. 2017 | Three hospitals within one Australian metropolitan healthcare organisation.<br><br>PACUs within the three hospitals. | All adult patients undergoing elective surgery on days of data collection before and after the implementation of PACT (before period July-Oct 2012) (after period July-Sept 2014). (Half the patients were day surgery cases.) | Emergency surgery, minor procedure only requiring sedation, post-operative planned admission to ICU.                                                                                                                                                                                                                                       | Intervention group: mean= 50.87 (SD 17.4)<br>Comparison group: mean= 52.14 (SD 18.6) | Intervention group: male= 38.8%, female= 61.2%<br>Comparison group: male=41.6%, female= 58.4% | No specific groups appear to have been excluded from the study.                                                                                                                                    | Intervention group n=694<br>Comparison group n=723 |
| 8<br>9<br>10<br>11<br>12<br>13<br>14                     | Tayrose, Newman et al. 2013  | NYU hospital for Joint Diseases, New York.<br><br>Recovery room and general orthopaedic ward.                        | 900 consecutive hip and knee arthroplasty patients.                                                                                                                                                                            | Not stated                                                                                                                                                                                                                                                                                                                                 | Intervention group: mean= 63.7<br>Comparison group: mean= 64.3                       | Intervention group: male=125, female=206<br>Comparison group: male= 216, female=353           | Unable to assess, and exclusion criteria are not stated.                                                                                                                                           | Intervention group n=331<br>Comparison group n=569 |
| 15<br>16<br>17<br>18<br>19<br>20<br>21<br>22<br>23<br>24 | Zoremba, Dette et al. 2009   | University of Marburg, Germany.<br><br>PACU within a tertiary teaching hospital.                                     | 60 obese adult patients (BMI 30-40) ASA 2-3, scheduled for minor peripheral surgery. Minimum surgery duration=40min, maximum surgery duration= 120 min.                                                                        | Abdominal surgery, surgery requiring head-down tilt, history of GORD, hiatus hernia, likely difficult intubation, pregnancy, emergency operation, severe renal dysfunction, asthma requiring therapy, cardiac disease associated with dyspnoea (NYHA >2), severe psychiatric disorders or difficulties in cooperating during measurements. | Intervention group: mean 52 years<br>Control group: mean 53 years                    | Not stated                                                                                    | Multimorbid patients with ASA >3 have been excluded (this is stated specifically in the exclusion criteria). All major surgery (including abdominal surgery) has also been intentionally excluded. | Intervention group n=30<br>Control group n=30      |

25  
26  
27  
28  
29  
30  
31  
32  
33  
34  
35  
36  
37  
38  
39  
40  
41  
42  
43  
44  
45  
46

## Interventions additional table:

| <i>Source</i>                    | <i>Intervention name</i>                                                                                           | <i>Aims and rationale</i>                                                                                                                                                                                                                                                               | <i>Methods</i>                                                                                                                                                                                                                                                                                                                                                                                                                                                                                                                                                           | <i>Intervention delivery (staff and location)</i>                                                                                                                                                                                                                                                                                 | <i>Timing of intervention</i>                                                                                                                     | <i>Tailoring of intervention</i>                                                                                                     | <i>Modifications made</i>                                                                                                      | <i>Assessment of fidelity</i>                                                                                                                                                              |
|----------------------------------|--------------------------------------------------------------------------------------------------------------------|-----------------------------------------------------------------------------------------------------------------------------------------------------------------------------------------------------------------------------------------------------------------------------------------|--------------------------------------------------------------------------------------------------------------------------------------------------------------------------------------------------------------------------------------------------------------------------------------------------------------------------------------------------------------------------------------------------------------------------------------------------------------------------------------------------------------------------------------------------------------------------|-----------------------------------------------------------------------------------------------------------------------------------------------------------------------------------------------------------------------------------------------------------------------------------------------------------------------------------|---------------------------------------------------------------------------------------------------------------------------------------------------|--------------------------------------------------------------------------------------------------------------------------------------|--------------------------------------------------------------------------------------------------------------------------------|--------------------------------------------------------------------------------------------------------------------------------------------------------------------------------------------|
| Callaghan, Lynch et al. 2005     | Introduction of OIR (Overnight Intensive Recovery)                                                                 | The majority of vascular surgical patients were routinely admitted to ICU post-operatively. However, several studies have demonstrated that extubation in theatre after AAA repair is safe[1] and that routine admission to ICU after infra-renal aortic surgery is unnecessary [2, 3]. | <p>Surgical patients assessed preoperatively by vascular surgeon and anaesthetist (ECG and full bloods). Patient referred to specialist if further pre-operative assessment is required.</p> <p>OIR located in theatre recovery. Maximum stay 24 hours. No facilities for mechanical ventilation or renal replacement therapy.</p> <p>Patients reviewed in the morning by surgical teams, and discharged to the ward if stable. If ongoing instability, patients transferred to ICU</p> <p>Face to face delivery of intervention</p> <p>No co-interventions apparent</p> | <p>Nurse to patient ratio 1:1</p> <p>Day time medical coverage provided by PACU anaesthetist and vascular surgical teams. Overnight medical care provided by the on-call anaesthetist and general surgical teams.</p> <p>No specific training or upskilling period detailed. Pre-existing medical and nursing skills required</p> | Intervention provided post-operatively for a maximum of 24 hours.                                                                                 | Post-operative medical care tailored to each patient. However, the OIR environment was not changed during the study.                 | OIR does not appear to have been modified or adapted during the study                                                          | No specific mention of steps taken to ensure fidelity in the OIR pathway. Anaesthetic techniques do appear to have been standardised, as well as post-operative analgesia.                 |
| Eichenberger, Haller et al. 2011 | Introduction of a two-track clinical pathway that clearly defined & coordinated medical and nursing interventions. | Post-operative complications have a major impact on survival, especially in the older population [4, 5]. A clinical review of current practices prior to implementation of the pathway showed that poorly defined                                                                       | <p>Fast track pathway: nurse driven, ASA 1-2. At 15min intervals nursing staff evaluate patients' vitals using Aldrete score, and pain is assessed using verbal numeric rating scale.</p> <p>Slow track pathway: physician driven, ASA 3-</p>                                                                                                                                                                                                                                                                                                                            | Fast-track programme: initial post-operative care prescribed by the anaesthetist and provided by the PACU nursing staff. Ongoing care is delivered by the PACU nursing staff only (unless                                                                                                                                         | Fast-track programme: care provided immediately post-operatively. Discharge performed without further communication with the PACU anaesthetist if | Initial post-op treatment plan prescribed by the treating anaesthetist was tailored to the patient and their specific medical needs. | No adaptations appear to have been made to either pathway during the study period. However, this is not specifically discussed | <p>Fast track pathway: methods of ensuring adherence to the pathway not discussed.</p> <p>Slow track pathway: adherence to the clinical pathway was ensured during daily rounds by the</p> |

|                              |                                              |                                                                                                                                                                                                                                                                                                                                |                                                                                                                                                                                                                                                                                                                                                                                                                              |                                                                                                                                                                                                                                                                                                                                            |                                                                                                                                                                                                                                                                           |                                                                        |                                                        |                                                                                                                                                                                    |
|------------------------------|----------------------------------------------|--------------------------------------------------------------------------------------------------------------------------------------------------------------------------------------------------------------------------------------------------------------------------------------------------------------------------------|------------------------------------------------------------------------------------------------------------------------------------------------------------------------------------------------------------------------------------------------------------------------------------------------------------------------------------------------------------------------------------------------------------------------------|--------------------------------------------------------------------------------------------------------------------------------------------------------------------------------------------------------------------------------------------------------------------------------------------------------------------------------------------|---------------------------------------------------------------------------------------------------------------------------------------------------------------------------------------------------------------------------------------------------------------------------|------------------------------------------------------------------------|--------------------------------------------------------|------------------------------------------------------------------------------------------------------------------------------------------------------------------------------------|
|                              |                                              | management and discharge criteria resulted in insecurity of the PACU physicians, nursing staff stress and delayed admission of patients from theatre. Evidence suggests that significant post-operative complications can be detected and successfully treated in well-organised PACUs, resulting in increased survival [6-9]. | 5 who have undergone minor or major surgery, or developed post-op complications. Formal handover to PACU anaesthetist. Standardised investigations and treatment guidelines for early post-operative complications. Intervention delivered face-to-face in PACU. No co-interventions identified                                                                                                                              | there is evidence of a complication).<br><br>Slow-track programme: care provided by the PACU anaesthetist with the help of nursing staff<br><br>Pre-existing skills required: PACU specialist nursing staff (overnight nurse also ICU qualified). No specific training for either nursing staff or medical staff is detailed in the study. | Aldrete score is $\geq 8$ and the verbal numeric rating scale is $\leq 3$<br><br>Slow-track programme: care provided immediately post-operatively. Discharge based on Aldrete score $\geq 8$ and normal blood gas analysis. PACU physician in charge decides on discharge |                                                                        |                                                        | medical head of the PACU, and during weekly quality control, feedback and information meetings.                                                                                    |
| Fraser and Nair 2016         | Opening of an extended recovery unit         | Was felt that some patients admitted to critical care post-operatively only required short term monitoring and optimisation [10]. Unnecessary admissions of patients to critical care increases bed occupancy in the unit, and was contributing to significant numbers of OT cancellations.                                    | Extended Recovery Unit was opened in Oct 2014. Patients booked into the unit in advance. 4-6 hour stay. Standard form was completed by nursing staff for every patient: recording time and place of discharge, complications encountered and medical assistance required. (Recorded how many patients were assessed as safe to return to ward, and how many still required level 2 care)<br><br>Nil co-interventions evident | Anaesthetists provided post-op medical care/ plans in the extended recovery unit. Recovery nursing staff provided care and completed the standard service evaluation form.                                                                                                                                                                 | Patients stayed in the extended recovery unit for 4-6 hours post-op.                                                                                                                                                                                                      | Not tailored                                                           | No                                                     | No mention of steps taken to ensure standardisation of treatment. Standard form provided to nursing staff, but no mention if forms were audited to ensure correct data collection. |
| Kastrup, Seeling et al. 2012 | Introduction of intensivist coverage in PACU | Increasing demand for critical care, which can lead to capacity limitations in the ICU. This causes                                                                                                                                                                                                                            | PACU physician is in charge of allocation of patients to the PACU, ICU and IMCU (intermediate care unit)                                                                                                                                                                                                                                                                                                                     | Staffing of the PACU was changed so that both the nursing and physician staffing are covered by the ICU                                                                                                                                                                                                                                    | Intervention provided immediately post-operatively.                                                                                                                                                                                                                       | Immediate post-operative care tailored to each patient by the treating | No apparent modification to the intervention were made | There is no mention of fidelity assessment. As intervention was a change in staffing                                                                                               |

|                                                                                                                                                          |                                       |                                                                                                                                                                                                             |                                                                                                                                                                                                                                                                                                                                                                                                                                                                                                                                                                                                                                                                                                           |                                                                                                                                                                                                                                      |                                                                                                                                               |                                                                                                                                                                                               |                                                                           |                                                                                                                                                                                                                                                                                                                                                                                              |
|----------------------------------------------------------------------------------------------------------------------------------------------------------|---------------------------------------|-------------------------------------------------------------------------------------------------------------------------------------------------------------------------------------------------------------|-----------------------------------------------------------------------------------------------------------------------------------------------------------------------------------------------------------------------------------------------------------------------------------------------------------------------------------------------------------------------------------------------------------------------------------------------------------------------------------------------------------------------------------------------------------------------------------------------------------------------------------------------------------------------------------------------------------|--------------------------------------------------------------------------------------------------------------------------------------------------------------------------------------------------------------------------------------|-----------------------------------------------------------------------------------------------------------------------------------------------|-----------------------------------------------------------------------------------------------------------------------------------------------------------------------------------------------|---------------------------------------------------------------------------|----------------------------------------------------------------------------------------------------------------------------------------------------------------------------------------------------------------------------------------------------------------------------------------------------------------------------------------------------------------------------------------------|
| 1<br>2<br>3<br>4<br>5<br>6<br>7<br>8<br>9<br>10<br>11<br>12<br>13<br>14<br>15<br>16<br>17                                                                |                                       | delay in admissions of patients from ED, cancellation of surgery [11, 12], early discharge from ICU [11, 13-15], initiation of treatment in ED or on a standard ward and inter-hospital transfers [12, 16]. | in collaboration with the surgeons. If no intensive care bed available, patients can be treated in the PACU for up to 24 hours (independent of the degree of organ failure) There are 6 beds with complete intensive care monitoring and respiratory care possibilities available.<br><br>Face to face delivery of intervention<br><br>No co intervention evident or discussed                                                                                                                                                                                                                                                                                                                            | team. The physician staffing was changed to a 24hr in-house critical care physician and nurse presence for the PACU. 1:3 nurse, patient ratio. 1 physician for all PACU patients.                                                    | Patients can be immediately admitted to the PACU around the clock (without any delays).                                                       | anaesthetist and surgeon.                                                                                                                                                                     | during the study period.                                                  | model, this would have been monitored by the anaesthetist/ICU physician in charge.                                                                                                                                                                                                                                                                                                           |
| 18<br>19<br>20<br>21<br>22<br>23<br>24<br>25<br>26<br>27<br>28<br>29<br>30<br>31<br>32<br>33<br>34<br>35<br>36<br>37<br>38<br>39<br>40<br>41<br>42<br>43 | Schweizer, Khatchatourian et al. 2002 | Opening of a new PACU (post-anaesthesia care unit)                                                                                                                                                          | Utilisation of the ICU for routine post-op care is commonplace, however ICUs account for an increasing proportion of a hospitals budget [17-19].<br><br>PACU moved to an area closer to theatres and the ICU, and was expended with additional beds to provide overnight care following major, non-cardiac surgery.<br><br>Standardised rounding (morning and evening), with review of patient's clinical status, laboratory results and chest radiographs.<br><br>Co-interventions: Preoperative risk assessment guidelines of the American Heart association and the American College of Cardiology (AHA/ACC) were introduced, and antiadrenergic medications (beta-blockers and alpha-2-agonists) were | New PACU staffed with anaesthesia-trained nurses (1:3 ratio), post-operative care coordinated by cardiothoracic surgical and anaesthesia teams, 24-hour medical coverage provided by one PACU resident (supervised by an attending). | New PACU provided 24-hour medical coverage. Patients were admitted immediately post-operatively. (Time limit on PACU admission not specified) | Post-operative care standardised as much as possible, but ongoing care tailored to each patient based on pre-existing medical comorbidities, intra-operative events and post-op complications | Intervention does not appear to have been altered during the study period | Variations in medical practice were minimised using standard protocols for blood test analysis, CXR orders, antibiotic prophylaxis, pain control, fluid administration, respiratory therapy, nutrition and mobilisation.<br><br>All surgical procedures and approach standardised as much as possible. General anaesthesia standardised. Post-operative analgesia regimen also standardised. |

|                              |                                                       |                                                                                                                                                                                                                                                                                                                                                                                                                   |                                                                                                                                                                                                                                                                                                                                                                                                                                                                                                                                                                                                                                                                                                                                                                                                              |                                                                                                                                                                                                                                                                                                                                                                                     |                                                                                                                                                                                                                                                                                                                                                                                 |                                                     |                                                                                   |                                                                                                                                                                                                                                                                           |
|------------------------------|-------------------------------------------------------|-------------------------------------------------------------------------------------------------------------------------------------------------------------------------------------------------------------------------------------------------------------------------------------------------------------------------------------------------------------------------------------------------------------------|--------------------------------------------------------------------------------------------------------------------------------------------------------------------------------------------------------------------------------------------------------------------------------------------------------------------------------------------------------------------------------------------------------------------------------------------------------------------------------------------------------------------------------------------------------------------------------------------------------------------------------------------------------------------------------------------------------------------------------------------------------------------------------------------------------------|-------------------------------------------------------------------------------------------------------------------------------------------------------------------------------------------------------------------------------------------------------------------------------------------------------------------------------------------------------------------------------------|---------------------------------------------------------------------------------------------------------------------------------------------------------------------------------------------------------------------------------------------------------------------------------------------------------------------------------------------------------------------------------|-----------------------------------------------------|-----------------------------------------------------------------------------------|---------------------------------------------------------------------------------------------------------------------------------------------------------------------------------------------------------------------------------------------------------------------------|
|                              |                                                       |                                                                                                                                                                                                                                                                                                                                                                                                                   | increasingly administered peri operatively                                                                                                                                                                                                                                                                                                                                                                                                                                                                                                                                                                                                                                                                                                                                                                   |                                                                                                                                                                                                                                                                                                                                                                                     |                                                                                                                                                                                                                                                                                                                                                                                 |                                                     |                                                                                   |                                                                                                                                                                                                                                                                           |
| Street, Phillips et al. 2017 | Implementation of a Post Anaesthesia Care Tool (PACT) | Current post-operative death rate of 0.4-4%, and major complication rate of 3-17%. 40% of in-hospital complications are associated with surgery [20, 21]. Hospital costs for surgical patients experiencing a complication are significantly higher than for patients without complications [22-24]. Intensive observation of patients in PACU by nurses can help with the early detection of complications [25]. | <p>Implementation of the tool was supported by peri-operative nursing educators. Materials included posters summarising how to complete the PACT, and feedback sessions between the nurses using the tool and the perioperative team. PACT was included in the revised 'Post-anaesthetics care record'</p> <p>Working party was established to develop the tool. Extensive review of the current processes at each of the hospitals was done. Researchers conducted a systematic review and an expert consensus statement to evaluate the current evidence. PACT tool developed in line with the National Consensus Statement on the essential elements for recognising and responding to clinical deterioration.</p> <p>Face to face delivery of the intervention.</p> <p>No co-interventions apparent.</p> | <p>Perioperative nurse educators trained recovery nurses in the use of the tool. Feedback sessions during the training period were attended by the perioperative team including, educators, nurse unit managers and the quality unit of the organisation. Recovery nursing staff used the PACT in recovery. Medical staff responded to concerns that were triggered by the PACT</p> | <p>PACT used immediately post-operatively, until patient was safe for discharge to the ward (of home for day surgery patients).</p> <p>Patient readiness for discharge from PACU was recorded by a checklist of criteria: last 2 sets of observations were not within the MET criteria, no active vomiting, pain management ordered and all surgical concerns had been met.</p> | <p>Intervention does not appear to be tailored.</p> | <p>No modifications appear to have been made once the study period commenced.</p> | <p>Feedback sessions during the training period were attended by the perioperative team including, educators, nurse unit managers and the quality unit of the organisation. However, there is no mention of fidelity assessment or auditing once the tool was in use.</p> |
| Tayrose, Newman et al. 2013  | Rapid rehab patients started as part of a pilot       | Previous studies have shown that early mobilisation after                                                                                                                                                                                                                                                                                                                                                         | Therapy program was the same for each group: therapist would                                                                                                                                                                                                                                                                                                                                                                                                                                                                                                                                                                                                                                                                                                                                                 | Physiotherapists delivered the intervention                                                                                                                                                                                                                                                                                                                                         | Therapy commenced in the                                                                                                                                                                                                                                                                                                                                                        | Intervention was tailored to the speed of recovery  | No adaptations or modifications appear to have                                    | No assessment of fidelity reported. Unclear how the                                                                                                                                                                                                                       |

1  
2  
3  
4  
5  
6  
7  
8  
9  
10  
11  
12  
13  
14  
15  
16  
17  
18  
19  
20  
21  
22  
23  
24  
25  
26  
27  
28  
29  
30  
31  
32  
33  
34  
35  
36  
37  
38  
39  
40  
41  
42  
43  
44  
45  
46



|                                   |                                                                                        |                                                                                                                                                                                                                                                                                                                                                                                                             |                                                                                                                                                                                                                                                                                                                                                                                                                                                          |                                                                                                                                                                                                                                                          |                                                                                                                   |                                                                                                                                                                                                                        |                                                   |                                                                                                                                                                                                                                                                                                                                                                |
|-----------------------------------|----------------------------------------------------------------------------------------|-------------------------------------------------------------------------------------------------------------------------------------------------------------------------------------------------------------------------------------------------------------------------------------------------------------------------------------------------------------------------------------------------------------|----------------------------------------------------------------------------------------------------------------------------------------------------------------------------------------------------------------------------------------------------------------------------------------------------------------------------------------------------------------------------------------------------------------------------------------------------------|----------------------------------------------------------------------------------------------------------------------------------------------------------------------------------------------------------------------------------------------------------|-------------------------------------------------------------------------------------------------------------------|------------------------------------------------------------------------------------------------------------------------------------------------------------------------------------------------------------------------|---------------------------------------------------|----------------------------------------------------------------------------------------------------------------------------------------------------------------------------------------------------------------------------------------------------------------------------------------------------------------------------------------------------------------|
|                                   | <p>program where the first 2 cases of the day were mobilised in the recovery room.</p> | <p>total joint replacement enhances post-op recovery and promotes faster rehabilitation [26, 27]. Previous studies have also demonstrated early mobilisation leads to a decreased LOS, improve patient outcomes, and demonstrate cost savings [28-30]. However, it's unclear if early mobilisation that starts in the recovery room will lead to a reduction in LOS while maintaining patient outcomes.</p> | <p>start with having patients hang their legs over the side of the bed. Therapy would then progress with transferring to a chair, ambulation, and climbing stairs. The expectation for a patient was to ambulate 100 feet or greater, and climb 6 stairs, prior to discharge.</p> <p>Face to face delivery of intervention by physiotherapists</p> <p>No co-interventions described</p>                                                                  | <p>Standard rehabilitation program implemented. Reliance of physiotherapists pre-existing skills and training.</p>                                                                                                                                       | <p>recovery room on the day of surgery</p>                                                                        | <p>of each patient. If a patient was unfit to mobilise on the day of surgery in PACU (as per the anaesthetist, surgeon or ICU doctor), they were not mobilised despite being one of the first 2 cases for the day.</p> | <p>occurred during the study.</p>                 | <p>standardisation of the rehabilitation program was ensured.</p>                                                                                                                                                                                                                                                                                              |
| <p>Zoremba, Dette et al. 2009</p> | <p>Patients performed incentive spirometry in the PACU</p>                             | <p>Even several days after surgery, obese patients exhibit a measurable amount of atelectasis, predisposing them to post-op pulmonary complications [31-35].</p>                                                                                                                                                                                                                                            | <p>Physiotherapist supervised the respiratory physiotherapy treatment at all times. Exercises were started approximately 15 minutes after extubation, and the patients were encouraged to perform 15 deep breaths (incentive spirometry) every 10-15 minutes within the first 2 hours after surgery. If needed, patients were asked to cough during the pause to mobilise secretions. All therapy was performed in the sitting position if possible.</p> | <p>Physiotherapists supervised the respiratory physiotherapy treatment at all times</p> <p>Pre-existing skills required to deliver the intervention. No mention of specific training provided to the physiotherapists apart from the study protocol.</p> | <p>Intervention was delivered commencing 15 minutes post-operatively, continuing until 2 hours after surgery.</p> | <p>Intervention does not appear to have been tailored</p>                                                                                                                                                              | <p>No change to intervention during the study</p> | <p>Spirometry was standardised as much as possible. At each assessment time, spirometry was performed at least 3 times, and the best measurement was recorded (in line with the criteria of the European Respiratory Society). Factors that interfered with breathing (eg pain, shivering) were eliminated, or minimised to produce reliable measurements)</p> |

1  
2  
3  
4  
5  
6  
7  
8  
9  
10  
11  
12  
13  
14  
15  
16  
17  
18  
19  
20  
21  
22  
23  
24  
25  
26  
27  
28  
29  
30  
31  
32  
33  
34  
35  
36  
37  
38  
39  
40  
41  
42  
43  
44  
45  
46

No co-interventions described

#### Outcomes and comparison groups additional table:

| Source                           | Primary outcomes                                             | Method of assessing primary outcome measure                                                                                                                                                                                                                        | Timing of primary outcome assessment                                                                              | Adverse events                                         | Secondary outcomes                                              | Method of assessing secondary outcome measure                                                                                       | Timing of secondary outcome measure                     |
|----------------------------------|--------------------------------------------------------------|--------------------------------------------------------------------------------------------------------------------------------------------------------------------------------------------------------------------------------------------------------------------|-------------------------------------------------------------------------------------------------------------------|--------------------------------------------------------|-----------------------------------------------------------------|-------------------------------------------------------------------------------------------------------------------------------------|---------------------------------------------------------|
| Callaghan, Lynch et al. 2005     | In hospital mortality                                        | Patients who had surgery were identified using a combination of computerized theatre records, surgeon's logbooks, and theatre booking diaries. Case notes analysed retrospectively. POSSUM variables collected prospectively (during the pre-operative assessment) | Retrospective analysis<br>No follow-up required                                                                   | OIR group: Admission to ICU within 48 hours of surgery | Operative characteristics. Common post-operative complications. | Case notes analysed retrospectively. Only complications occurring on more than four occasions during the study period are included. | Retrospective analysis of notes. No follow-up required. |
|                                  | In hospital morbidity                                        |                                                                                                                                                                                                                                                                    |                                                                                                                   |                                                        |                                                                 |                                                                                                                                     |                                                         |
|                                  | Mean postoperative stay, days                                |                                                                                                                                                                                                                                                                    |                                                                                                                   |                                                        |                                                                 |                                                                                                                                     |                                                         |
|                                  | Median POSSUM operative severity score                       |                                                                                                                                                                                                                                                                    |                                                                                                                   |                                                        |                                                                 |                                                                                                                                     |                                                         |
| Eichenberger, Haller et al. 2011 | PACU length of stay                                          | Anaesthetic Information system (computerize patient information system. PACU data entered by PACU nurses and PACU secretary)                                                                                                                                       | Data entered in real time in PACU. Data reviewed retrospectively by investigators.                                | Nil reported                                           | Nil reported                                                    | NA                                                                                                                                  | NA                                                      |
|                                  | In-hospital mortality                                        | The hospital administrative database (administrative information used for financial purposes). Cause of death extracted from patient discharge reports, and entered into the administrative database by professional coders.                                       | Data entered throughout the post-operative period until discharge. Data reviewed retrospectively by investigators |                                                        |                                                                 |                                                                                                                                     |                                                         |
|                                  | Unplanned ICU admissions after PACU stay                     | The hospital administrative database. Reason for unplanned ICU admission extracted from patient discharge report and entered into database by professional coders.                                                                                                 | Data entered throughout the post-operative period. Reason for ICU admission entered after patient discharge.      |                                                        |                                                                 |                                                                                                                                     |                                                         |
| Fraser and Nair 2016             | Discharge destination after extended recovery unit admission | Standard form completed by nursing staff in extended recovery, documenting time and place of discharge, complications encountered and medical assistance required.                                                                                                 | Assessment made at time of extended recovery discharge. No follow-up done.                                        | Nil reported                                           | Nil reported                                                    | NA                                                                                                                                  | NA                                                      |

|                                                                                                                                                                                                                                              |                                                                                                                                                                                                                                                                                                                                                                                                                                                                   |                                                                                                                                                                                                                                                                                                                                                                                                                                                                                                                                                                                                                                                  |                                                                                                                                                |                     |                                                                                                                                                                                                                                                                                                                        |                                                                                                                                                                                                                                                                                                                  |                                                                                                                                   |
|----------------------------------------------------------------------------------------------------------------------------------------------------------------------------------------------------------------------------------------------|-------------------------------------------------------------------------------------------------------------------------------------------------------------------------------------------------------------------------------------------------------------------------------------------------------------------------------------------------------------------------------------------------------------------------------------------------------------------|--------------------------------------------------------------------------------------------------------------------------------------------------------------------------------------------------------------------------------------------------------------------------------------------------------------------------------------------------------------------------------------------------------------------------------------------------------------------------------------------------------------------------------------------------------------------------------------------------------------------------------------------------|------------------------------------------------------------------------------------------------------------------------------------------------|---------------------|------------------------------------------------------------------------------------------------------------------------------------------------------------------------------------------------------------------------------------------------------------------------------------------------------------------------|------------------------------------------------------------------------------------------------------------------------------------------------------------------------------------------------------------------------------------------------------------------------------------------------------------------|-----------------------------------------------------------------------------------------------------------------------------------|
| <p>1<br/>2<br/>3<br/>4<br/>5<br/>6<br/>7<br/>8<br/>9<br/>10<br/>11<br/>12<br/>13<br/>14<br/>15</p> <p>Kastrup, Seeling et al. 2012</p>                                                                                                       | <p>LOS in PACU (days)</p> <p>LOS in ICU (all types of ICU's)(days)</p> <p>Pre operative days (all patients)</p> <p>Pre operative day (PACU-patients)</p> <p>Pre operative day (ICU-patients)</p> <p>Days on normal ward</p> <p>LOS hospital (days)</p> <p>CMI (case mix index) normal ward</p> <p>CM ICU</p> <p>CW (cost weight) per hospital stay (overall)</p>                                                                                                  | <p>Data collected from the hospital administration system. All clinically relevant data are documented in a patient data management system (PDMS) and can be extracted for evaluations. Every patient admitted to the ICU in included in the system (COPRA-System® GmbH, Sasbachwalden, Germany). 24-hours after patient discharge, the record is changed to a read-only version so that no modifications can be made.</p>                                                                                                                                                                                                                       | <p>Retrospective analysis of data. Data continuously collected until patient discharge. No follow-up post-discharge.</p>                       | <p>Nil reported</p> | <p>General descriptive variables for the ICU, before and after the introduction of the PACU (ICU patients only).</p>                                                                                                                                                                                                   | <p>Data extracted from patient data management system (PDMS). DRG system allows for coding of the intensive care as DRG procedure, making the severity of disease relevant for reimbursement. The “Complex intensive care treatment” is based on several scores, which are collected within the PDMS system.</p> | <p>Retrospective analysis of data. Data continuously collected until patient discharge. No follow-up post-discharge.</p>          |
| <p>16<br/>17<br/>18<br/>19<br/>20<br/>21<br/>22<br/>23<br/>24<br/>25<br/>26<br/>27<br/>28<br/>29<br/>30<br/>31<br/>32<br/>33<br/>34<br/>35<br/>36<br/>37<br/>38<br/>39<br/>40<br/>41<br/>42</p> <p>Schweizer, Khatchatourian et al. 2002</p> | <p>Mortality</p> <p>Re-operation</p> <p>Secondary admission to ICU (either from PACU or from the ward)</p> <p>Cardiac complications</p> <ul style="list-style-type: none"> <li>• Myocardial infarct</li> <li>• Arrhythmias</li> <li>• Pulmonary oedema</li> </ul> <p>Respiratory complications</p> <ul style="list-style-type: none"> <li>• Atelectasis</li> <li>• Bronchopneumonia</li> </ul> <p>Mechanical ventilation &gt;6 hours</p> <p>Renal dysfunction</p> | <p>Data prospectively collected on standardized worksheets describing the pre-operative, intraoperative and postoperative periods. One investigator also reviewed all nursing charts, medical records and hospital discharge letters.</p> <p>Data abstracted from two institutional databases</p> <p>Data obtained from the hospital computer</p> <p>Data were prospectively collected on standardized worksheets describing the pre-operative, intraoperative and postoperative periods. One investigator also reviewed all nursing charts, medical records and hospital discharge letters.</p> <p>As above</p> <p>As above</p> <p>As above</p> | <p>Outcome assessments done during inpatient stay, and on review of the hospital data base. No follow-up required after hospital discharge</p> | <p>Nil reported</p> | <p>Identification of independent risk factors for mortality and major complications following thoracic surgery</p> <p>Identification of independent risk factors for mortality and major complications following major vascular surgery</p> <p>Evaluation of perioperative antiadrenergic treatment administration</p> | <p>Data abstracted from two institutional databases</p>                                                                                                                                                                                                                                                          | <p>Patient risk factors reported pre-operatively and intraoperatively (prospective data collection). Analysed at a later date</p> |

|                              |                                                           |                                                                                                                                                                                                                                                                                                                                                                                                                                                                          |                                                                                        |              |                                                           |                                                                                                                                                                                                                                                                                                                                                                                                                                                       |                                                                                      |
|------------------------------|-----------------------------------------------------------|--------------------------------------------------------------------------------------------------------------------------------------------------------------------------------------------------------------------------------------------------------------------------------------------------------------------------------------------------------------------------------------------------------------------------------------------------------------------------|----------------------------------------------------------------------------------------|--------------|-----------------------------------------------------------|-------------------------------------------------------------------------------------------------------------------------------------------------------------------------------------------------------------------------------------------------------------------------------------------------------------------------------------------------------------------------------------------------------------------------------------------------------|--------------------------------------------------------------------------------------|
|                              | Hospital length of stay                                   | Data obtained from the hospital computer                                                                                                                                                                                                                                                                                                                                                                                                                                 |                                                                                        |              |                                                           |                                                                                                                                                                                                                                                                                                                                                                                                                                                       |                                                                                      |
| Street, Phillips et al. 2017 | Nursing management of patient symptoms                    | Data collected by research nurses from the medical record following patient discharge. Severity of each adverse event was graded using the Common Terminology Criteria for Adverse Events (V.4.03) and grouped into mild (no or minimal effect to the patient and resolved spontaneously), moderate (event with resolved after intervention, with no lasting effect for the patient) and severe (required intervention and caused harm to the patient, including death). | Data reviewed from case notes on patient discharge. No longer term follow-up required. | Nil reported | Health service usage and healthcare costs                 | Economic evaluation done from organization data that were routinely submitted to the regional health department for benchmarking. Healthcare costs for each patient admitted to hospital are calculated on a cost-weight analysis using the Australian Refined Diagnostic-Related Groups (AR-DRGs). The AR-DRG was used to calculate the costs for all initial admissions and unplanned readmission, using the nations efficient price determination. | Data reviewed from case notes on patient discharge. No long term follow-up required. |
|                              | Rates of adverse events                                   |                                                                                                                                                                                                                                                                                                                                                                                                                                                                          |                                                                                        |              |                                                           |                                                                                                                                                                                                                                                                                                                                                                                                                                                       |                                                                                      |
|                              | Mortality                                                 |                                                                                                                                                                                                                                                                                                                                                                                                                                                                          |                                                                                        |              |                                                           |                                                                                                                                                                                                                                                                                                                                                                                                                                                       |                                                                                      |
|                              | Length of stay in PACU                                    |                                                                                                                                                                                                                                                                                                                                                                                                                                                                          |                                                                                        |              |                                                           |                                                                                                                                                                                                                                                                                                                                                                                                                                                       |                                                                                      |
|                              | Length of hospital admission                              |                                                                                                                                                                                                                                                                                                                                                                                                                                                                          |                                                                                        |              |                                                           |                                                                                                                                                                                                                                                                                                                                                                                                                                                       |                                                                                      |
|                              | Discharge destination                                     |                                                                                                                                                                                                                                                                                                                                                                                                                                                                          |                                                                                        |              |                                                           |                                                                                                                                                                                                                                                                                                                                                                                                                                                       |                                                                                      |
| Tayrose, Newman et al. 2013  | Overall hospital length of stay                           | Retrospective review of cases, however it is not stated how this was done (case note reviews versus use of the hospital's database)                                                                                                                                                                                                                                                                                                                                      | At time of discharge                                                                   | Nil reported | Percentage completion of the rapid rehabilitation program | Progression of rehab was followed, however methods for assessing this were not stated.                                                                                                                                                                                                                                                                                                                                                                | Followed as an inpatient until the time of discharge.                                |
|                              | Hip arthroplasty subgroup length of stay                  |                                                                                                                                                                                                                                                                                                                                                                                                                                                                          |                                                                                        |              |                                                           |                                                                                                                                                                                                                                                                                                                                                                                                                                                       |                                                                                      |
|                              | Knee arthroplasty subgroup length of stay                 |                                                                                                                                                                                                                                                                                                                                                                                                                                                                          |                                                                                        |              |                                                           |                                                                                                                                                                                                                                                                                                                                                                                                                                                       |                                                                                      |
| Zoremba, Dette et al. 2009   | Pulse oximetry at 1hr, 2hr, 6hr and 24hr post-operatively | Assessed face to face by an investigator. The investigators were blinded.                                                                                                                                                                                                                                                                                                                                                                                                | At 1hr, 2hr, 6hr and 24hr respectively                                                 | Nil reported | Nil reported                                              | NA                                                                                                                                                                                                                                                                                                                                                                                                                                                    | NA                                                                                   |
|                              | Spirometry at 1hr, 2hr, 6hr and 24hr post-operatively     |                                                                                                                                                                                                                                                                                                                                                                                                                                                                          |                                                                                        |              |                                                           |                                                                                                                                                                                                                                                                                                                                                                                                                                                       |                                                                                      |

- Cohen, J., et al., *The Safety of Immediate Extubation After Abdominal Aortic Surgery: A Prospective, Randomised Control Trial*. *Anaesth Analg*, 2001. **93**: p. 1546-1549.
- Bertges, D., et al., *Is Routine Use of the Intensive Care Unit After Elective Infrarenal Aortic Aneurysm Repair Necessary?* *J Vasc Surg*, 2000(32): p. 634-642.
- Podore, P.C. and E.B. Throop, *Infrarenal aortic surgery with a 3-day hospital stay: A report on success with a clinical pathway*. *J Vasc Surg*, 1999. **29**(5): p. 787-92.
- Khuri, S.F., et al., *Determinants of long-term survival after major surgery and the adverse effect of postoperative complications*. *Ann Surg*, 2005. **242**(3): p. 326-41; discussion 341-3.
- Manku, K. and J.M. Leung, *Prognostic significance of postoperative in-hospital complications in elderly patients. II. Long-term quality of life*. *Anesth Analg*, 2003. **96**(2): p. 590-4, table of contents.
- Brown, I., et al., *Use of postanesthesia discharge criteria to reduce discharge delays for inpatients in the postanesthesia care unit*. *J Clin Anesth*, 2008. **20**(3): p. 175-9.
- Thompson, J.S., et al., *Temporal patterns of postoperative complications*. *Arch Surg*, 2003. **138**(6): p. 596-602; discussion 602-3.
- Vlayen, A., et al., *Incidence and preventability of adverse events requiring intensive care admission: a systematic review*. *J Eval Clin Pract*, 2012. **18**(2): p. 485-97.
- Weissman, C. and N. Klein, *The importance of differentiating between elective and emergency postoperative critical care patients*. *J Crit Care*, 2008. **23**(3): p. 308-16.
- Montpellier, D., E. Hayek, and M. Ossart, *[Objectives of consultation in anesthesia]*. *Phlebologie*, 1989. **42**(1): p. 7-18; discussion 18-20.

- 1 11. Chalfin, D.B., et al., *Impact of delayed transfer of critically ill patients from the emergency department to the intensive care unit*. Crit Care Med, 2007. **35**(6): p. 1477-83.
- 2 12. Duke, G.J., *Metropolitan audit of appropriate referrals refused admission to intensive care*. Anaesth Intensive Care, 2004. **32**(5): p. 702-6.
- 3 13. Campbell, A.J., et al., *Predicting death and readmission after intensive care discharge*. Br J Anaesth, 2008. **100**(5): p. 656-62.
- 4 14. Hanane, T., et al., *The association between nighttime transfer from the intensive care unit and patient outcome*. Crit Care Med, 2008. **36**(8): p. 2232-7.
- 5 15. Priestap, F.A. and C.M. Martin, *Impact of intensive care unit discharge time on patient outcome*. Crit Care Med, 2006. **34**(12): p. 2946-51.
- 6 16. Duke, G.J., et al., *Interventions to circumvent intensive care access block: a retrospective 2-year study across metropolitan Melbourne*. Med J Aust, 2009. **190**(7): p. 375-8.
- 7 17. Hanson, C.W., 3rd, et al., *Effects of an organized critical care service on outcomes and resource utilization: a cohort study*. Crit Care Med, 1999. **27**(2): p. 270-4.
- 8 18. Pollack, M.M., et al., *Improving the outcome and efficiency of intensive care: the impact of an intensivist*. Crit Care Med, 1988. **16**(1): p. 11-7.
- 9 19. Singer, M., et al., *The cost of intensive care: a comparison on one unit between 1988 and 1991*. Intensive Care Med, 1994. **20**(8): p. 542-9.
- 10 20. Brennan, T.A., et al., *Incidence of adverse events and negligence in hospitalized patients: results of the Harvard Medical Practice Study I. 1991*. Qual Saf Health Care, 2004. **13**(2): p. 145-51; discussion 151-2.
- 11 21. Weiser, T.G., et al., *An estimation of the global volume of surgery: a modelling strategy based on available data*. Lancet, 2008. **372**(9633): p. 139-44.
- 12 22. Birkmeyer, J.D., et al., *Hospital quality and the cost of inpatient surgery in the United States*. Ann Surg, 2012. **255**(1): p. 1-5.
- 13 23. de Vries, E.N., et al., *The incidence and nature of in-hospital adverse events: a systematic review*. Qual Saf Health Care, 2008. **17**(3): p. 216-23.
- 14 24. Khan, N.A., et al., *Association of postoperative complications with hospital costs and length of stay in a tertiary care center*. J Gen Intern Med, 2006. **21**(2): p. 177-80.
- 15 25. Prowse, M.A. and P.A. Lyne, *Clinical effectiveness in the post-anaesthesia care unit: how nursing knowledge contributes to achieving intended patient outcomes*. J Adv Nurs, 2000. **31**(5): p. 1115-24.
- 16 26. Khan, F., et al., *Multidisciplinary rehabilitation programmes following joint replacement at the hip and knee in chronic arthropathy*. Cochrane Database Syst Rev, 2008(2): p. Cd004957.
- 17 27. Renkawitz, T., et al., *Comparison of two accelerated clinical pathways--after total knee replacement how fast can we really go?* Clin Rehabil, 2010. **24**(3): p. 230-9.
- 18 28. Husted, H., et al., *What determines length of stay after total hip and knee arthroplasty? A nationwide study in Denmark*. Arch Orthop Trauma Surg, 2010. **130**(2): p. 263-8.
- 19 29. Minns Lowe, C.J., et al., *Effectiveness of physiotherapy exercise following hip arthroplasty for osteoarthritis: a systematic review of clinical trials*. BMC Musculoskelet Disord, 2009. **10**: p. 98.
- 20 30. Schneider, M., et al., *Predictive factors influencing fast track rehabilitation following primary total hip and knee arthroplasty*. Arch Orthop Trauma Surg, 2009. **129**(12): p. 1585-91.
- 21 31. Brismar, B., et al., *Pulmonary densities during anesthesia with muscular relaxation--a proposal of atelectasis*. Anesthesiology, 1985. **62**(4): p. 422-8.
- 22 32. Hedenstierna, G., *Alveolar collapse and closure of airways: regular effects of anaesthesia*. Clin Physiol Funct Imaging, 2003. **23**(3): p. 123-9.
- 23 33. Pelosi, P., et al., *Respiratory system mechanics in sedated, paralyzed, morbidly obese patients*. J Appl Physiol (1985), 1997. **82**(3): p. 811-8.
- 24 34. Rothen, H.U., et al., *Airway closure, atelectasis and gas exchange during general anaesthesia*. Br J Anaesth, 1998. **81**(5): p. 681-6.
- 25 35. Tokics, L., et al., *Lung collapse and gas exchange during general anesthesia: effects of spontaneous breathing, muscle paralysis, and positive end-expiratory pressure*. Anesthesiology, 1987. **66**(2): p. 157-67.



# PRISMA 2009 Checklist

| Section/topic                      | #  | Checklist item                                                                                                                                                                                                                                                                                              | Reported on page # |
|------------------------------------|----|-------------------------------------------------------------------------------------------------------------------------------------------------------------------------------------------------------------------------------------------------------------------------------------------------------------|--------------------|
| <b>TITLE</b>                       |    |                                                                                                                                                                                                                                                                                                             |                    |
| Title                              | 1  | Identify the report as a systematic review, meta-analysis, or both.                                                                                                                                                                                                                                         | 1                  |
| <b>ABSTRACT</b>                    |    |                                                                                                                                                                                                                                                                                                             |                    |
| Structured summary                 | 2  | Provide a structured summary including, as applicable: background; objectives; data sources; study eligibility criteria, participants, and interventions; study appraisal and synthesis methods; results; limitations; conclusions and implications of key findings; systematic review registration number. | 2                  |
| <b>INTRODUCTION</b>                |    |                                                                                                                                                                                                                                                                                                             |                    |
| Rationale                          | 3  | Describe the rationale for the review in the context of what is already known.                                                                                                                                                                                                                              | 3                  |
| Objectives                         | 4  | Provide an explicit statement of questions being addressed with reference to participants, interventions, comparisons, outcomes, and study design (PICOS).                                                                                                                                                  | 4                  |
| <b>METHODS</b>                     |    |                                                                                                                                                                                                                                                                                                             |                    |
| Protocol and registration          | 5  | Indicate if a review protocol exists, if and where it can be accessed (e.g., Web address), and, if available, provide registration information including registration number.                                                                                                                               | 4                  |
| Eligibility criteria               | 6  | Specify study characteristics (e.g., PICOS, length of follow-up) and report characteristics (e.g., years considered, language, publication status) used as criteria for eligibility, giving rationale.                                                                                                      | 4                  |
| Information sources                | 7  | Describe all information sources (e.g., databases with dates of coverage, contact with study authors to identify additional studies) in the search and date last searched.                                                                                                                                  | 4                  |
| Search                             | 8  | Present full electronic search strategy for at least one database, including any limits used, such that it could be repeated.                                                                                                                                                                               | 16                 |
| Study selection                    | 9  | State the process for selecting studies (i.e., screening, eligibility, included in systematic review, and, if applicable, included in the meta-analysis).                                                                                                                                                   | 5                  |
| Data collection process            | 10 | Describe method of data extraction from reports (e.g., piloted forms, independently, in duplicate) and any processes for obtaining and confirming data from investigators.                                                                                                                                  | 5                  |
| Data items                         | 11 | List and define all variables for which data were sought (e.g., PICOS, funding sources) and any assumptions and simplifications made.                                                                                                                                                                       | 5                  |
| Risk of bias in individual studies | 12 | Describe methods used for assessing risk of bias of individual studies (including specification of whether this was done at the study or outcome level), and how this information is to be used in any data synthesis.                                                                                      | 5                  |
| Summary measures                   | 13 | State the principal summary measures (e.g., risk ratio, difference in means).                                                                                                                                                                                                                               | 5                  |
| Synthesis of results               | 14 | Describe the methods of handling data and combining results of studies, if done, including measures of consistency (e.g., $I^2$ ) for each meta-analysis.                                                                                                                                                   | NA                 |



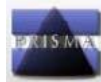

# PRISMA 2009 Checklist

| Section/topic                 | #  | Checklist item                                                                                                                                                                                           | Reported on page # |
|-------------------------------|----|----------------------------------------------------------------------------------------------------------------------------------------------------------------------------------------------------------|--------------------|
| Risk of bias across studies   | 15 | Specify any assessment of risk of bias that may affect the cumulative evidence (e.g., publication bias, selective reporting within studies).                                                             | 6                  |
| Additional analyses           | 16 | Describe methods of additional analyses (e.g., sensitivity or subgroup analyses, meta-regression), if done, indicating which were pre-specified.                                                         | NA                 |
| <b>RESULTS</b>                |    |                                                                                                                                                                                                          |                    |
| Study selection               | 17 | Give numbers of studies screened, assessed for eligibility, and included in the review, with reasons for exclusions at each stage, ideally with a flow diagram.                                          | 6                  |
| Study characteristics         | 18 | For each study, present characteristics for which data were extracted (e.g., study size, PICOS, follow-up period) and provide the citations.                                                             | 7                  |
| Risk of bias within studies   | 19 | Present data on risk of bias of each study and, if available, any outcome level assessment (see item 12).                                                                                                | 9-11               |
| Results of individual studies | 20 | For all outcomes considered (benefits or harms), present, for each study: (a) simple summary data for each intervention group (b) effect estimates and confidence intervals, ideally with a forest plot. | 11-12              |
| Synthesis of results          | 21 | Present results of each meta-analysis done, including confidence intervals and measures of consistency.                                                                                                  | 13                 |
| Risk of bias across studies   | 22 | Present results of any assessment of risk of bias across studies (see Item 15).                                                                                                                          | 13                 |
| Additional analysis           | 23 | Give results of additional analyses, if done (e.g., sensitivity or subgroup analyses, meta-regression [see Item 16]).                                                                                    | NA                 |
| <b>DISCUSSION</b>             |    |                                                                                                                                                                                                          |                    |
| Summary of evidence           | 24 | Summarize the main findings including the strength of evidence for each main outcome; consider their relevance to key groups (e.g., healthcare providers, users, and policy makers).                     | 13                 |
| Limitations                   | 25 | Discuss limitations at study and outcome level (e.g., risk of bias), and at review-level (e.g., incomplete retrieval of identified research, reporting bias).                                            | 14                 |
| Conclusions                   | 26 | Provide a general interpretation of the results in the context of other evidence, and implications for future research.                                                                                  | 14                 |
| <b>FUNDING</b>                |    |                                                                                                                                                                                                          |                    |
| Funding                       | 27 | Describe sources of funding for the systematic review and other support (e.g., supply of data); role of funders for the systematic review.                                                               | 15                 |

From: Moher D, Liberati A, Tetzlaff J, Altman DG, The PRISMA Group (2009). Preferred Reporting Items for Systematic Reviews and Meta-Analyses: The PRISMA Statement. PLoS Med 6(7): e1000097. doi:10.1371/journal.pmed1000097

For more information, visit: [www.prisma-statement.org](http://www.prisma-statement.org).

# BMJ Open

**"Organisation of delivery of care in operating suite recovery rooms within 48 hours postoperatively and patient outcomes after adult non-cardiac surgery: a systematic review."**

|                                 |                                                                                                                                                                                                                                                                                                                                                |
|---------------------------------|------------------------------------------------------------------------------------------------------------------------------------------------------------------------------------------------------------------------------------------------------------------------------------------------------------------------------------------------|
| Journal:                        | <i>BMJ Open</i>                                                                                                                                                                                                                                                                                                                                |
| Manuscript ID                   | bmjopen-2018-027262.R3                                                                                                                                                                                                                                                                                                                         |
| Article Type:                   | Original research                                                                                                                                                                                                                                                                                                                              |
| Date Submitted by the Author:   | 03-Jan-2020                                                                                                                                                                                                                                                                                                                                    |
| Complete List of Authors:       | Lloyd, Courtney; University of Adelaide, Faculty of Health and Medical Sciences<br>Ludbrook, Guy; University of Adelaide,<br>Story, David; The University of Melbourne , Perioperative and Pain Medicine Unit, Melbourne Medical School<br>Maddern, Guy; University of Adelaide, Discipline of Surgery, Faculty of Health and Medical Sciences |
| <b>Primary Subject Heading</b>: | Anaesthesia                                                                                                                                                                                                                                                                                                                                    |
| Secondary Subject Heading:      | Health services research, Surgery, Anaesthesia                                                                                                                                                                                                                                                                                                 |
| Keywords:                       | Post-operative care, Post-anaesthetic care, Recovery room, Post-anaesthetic care unit (PACU), ANAESTHETICS, HEALTH SERVICES ADMINISTRATION & MANAGEMENT                                                                                                                                                                                        |
|                                 |                                                                                                                                                                                                                                                                                                                                                |

SCHOLARONE™  
Manuscripts





I, the Submitting Author has the right to grant and does grant on behalf of all authors of the Work (as defined in the below author licence), an exclusive licence and/or a non-exclusive licence for contributions from authors who are: i) UK Crown employees; ii) where BMJ has agreed a CC-BY licence shall apply, and/or iii) in accordance with the terms applicable for US Federal Government officers or employees acting as part of their official duties; on a worldwide, perpetual, irrevocable, royalty-free basis to BMJ Publishing Group Ltd ("BMJ") its licensees and where the relevant Journal is co-owned by BMJ to the co-owners of the Journal, to publish the Work in this journal and any other BMJ products and to exploit all rights, as set out in our [licence](#).

The Submitting Author accepts and understands that any supply made under these terms is made by BMJ to the Submitting Author unless you are acting as an employee on behalf of your employer or a postgraduate student of an affiliated institution which is paying any applicable article publishing charge ("APC") for Open Access articles. Where the Submitting Author wishes to make the Work available on an Open Access basis (and intends to pay the relevant APC), the terms of reuse of such Open Access shall be governed by a Creative Commons licence – details of these licences and which [Creative Commons](#) licence will apply to this Work are set out in our licence referred to above.

Other than as permitted in any relevant BMJ Author's Self Archiving Policies, I confirm this Work has not been accepted for publication elsewhere, is not being considered for publication elsewhere and does not duplicate material already published. I confirm all authors consent to publication of this Work and authorise the granting of this licence.

**TITLE PAGE**

"Organisation of delivery of care in operating suite recovery rooms within 48 hours postoperatively and patient outcomes after adult non-cardiac surgery: a systematic review."

**Corresponding Author:**

Dr Courtney Lloyd MBBS  
Masters of Clinical Sciences Candidate  
University of Adelaide  
Faculty of Health and Medical Sciences  
AHMS Floor 8  
North Terrace  
Adelaide, South Australia 5000  
Email: courtney.lloyd@sa.gov.au  
Phone: +61 417 876 536

**Other Authors:**

Professor Guy Ludbrook PhD, MBBS, FANZCA  
Professor of Anaesthesia  
University of Adelaide  
Faculty of Health and Medical Sciences  
AHMS Floor 8  
North Terrace  
Adelaide, South Australia 5000  
Email: guy.ludbrook@adelaide.edu.au

Professor David Story MBBS, MD, BMedSci, FANZCA  
Chair of Anaesthesia  
Deputy Director, Centre for Integrated Critical Care  
Head of MCATS  
The University of Melbourne  
Parkville, Victoria 3010  
Email: dastory@unimelb.edu.au

Professor Guy J. Maddern PhD, MS, MD, FRACS, FAHMS  
RP Jepson Professor of Surgery  
University of Adelaide Discipline of Surgery  
Faculty of Health and Medical Sciences  
Clinical Director Surgical Services, Central Adelaide Local Health Network  
The Queen Elizabeth Hospital  
Woodville, South Australia 5011  
Email: guy.maddern@adelaide.edu.au

**Word Count:** 3396

**ABSTRACT**

**Context:** Post-operative recovery rooms have existed since 1847, however there is sparse literature investigating interventions undertaken in recovery, and their impact on patients after recovery room discharge.

**Objective:** This review aimed to investigate the organisation of care delivery in post-operative recovery rooms; and its effect on patient outcomes; including mortality, morbidity, unplanned intensive care unit (ICU) admission and length of hospital stay.

**Data sources:** NCBI PubMed, EMBASE and CINAHL.

**Study selection:** Studies published since 1990, investigating health system initiatives undertaken in post-operative recovery rooms. One author screened titles and abstracts, with two authors completing full text reviews to determine inclusion based on pre-determined criteria. A total of 3288 unique studies were identified, with 14 selected for full text reviews, and 8 included in the review.

**Data extraction:** EndNote 8 (Clarivate Analytics) was used to manage references. One author extracted data from each study using a data extraction form adapted from the Cochrane Data Extraction Template, with all data checked by a second author.

**Data synthesis:** Narrative synthesis of data was the primary outcome measure, with all data of individual studies also presented in the summary results table.

**Results:** Four studies investigated the use of PACU as a non-ICU pathway for post-operative patients. Two investigated the implementation of physiotherapy in PACU, one evaluated the use of a new nursing scoring tool for detecting patient deterioration, and one evaluated the implementation of a two-track clinical pathway in PACU.

**Conclusions:** Managing selected post-operative patients in a PACU, instead of ICU, does not appear to be associated with worse patient outcomes, however due to the high risk of bias within studies, the strength of evidence is only moderate. Four of eight studies also examined hospital length of stay; two found the intervention was associated with decreased length of stay and two found no association.

1  
2  
3 Key words: Post-operative care, post-anaesthetic care, recovery room, post-anaesthetic care unit  
4 (PACU)  
5  
6  
7

## 8 **STRENGTHS AND LIMITATIONS OF THIS STUDY**

### 9

- 10 • This is the first systematic review to provide a summary of the organisation of care delivery in  
11 recovery rooms and the impact on patient outcomes. It is a current area of interest for many  
12 hospitals/health networks, due to the frequency and cost of post-operative complications.
- 13 • The PRISMA statement was strictly adhered to, with a broad search strategy in an attempt to  
14 capture all relevant publications.
- 15 • The variation in study designs and primary outcome measures meant that we were unable to  
16 combine data for aggregate analysis or meta-analysis.
- 17 • Narrative synthesis of key results may introduce bias; however, steps were taken to minimise  
18 this, including the review of all data by a second author.
- 19  
20  
21  
22  
23  
24  
25

## 26 **INTRODUCTION**

### 27

### 28 **Rationale**

29  
30 The concept of a post-operative recovery room, or post anaesthesia care unit (PACU), was first  
31 described in 1847 [1], and the progression of surgical and anaesthetic techniques has seen marked  
32 advances in their form and function. However, there is a striking paucity of literature investigating the  
33 interventions undertaken in recovery, and their impact on patients after recovery room discharge. An  
34 editorial by C. Aps in 2004, discussed the concept of Overnight Intensive Recovery; where patients can  
35 be managed in the PACU for up to 24 hours[2], to avoid unnecessary intensive care unit (ICU)  
36 admissions and decrease cancellations due to lack of bed availability. This concept was introduced in  
37 the 1990s at St Thomas' Hospital, London[2]; and despite its apparent success, has not spawned  
38 further research surrounding such a model of care. Swart et al retrospectively examined the impact  
39 of the loss of access to a high dependency unit (HDU) for post-operative management of medium risk  
40 patients, and showed a significant increase in emergency laparotomies and unplanned critical care  
41 admissions[3]. However, the use of HDU for post-operative patients has also been associated with an  
42 increase in post-operative respiratory complications[4]. The concept of extended 6-hour recovery  
43 followed by a monitored ward bed, instead of an elective ICU admission post-operatively, has also  
44 shown to be safe, with no worsening in patient outcomes[5]. This review focusses on health services  
45 research, also known as health systems research; investigating models of care delivery, rather than  
46 single therapeutic interventions. Health systems research is a multidisciplinary field that examines  
47 access to, and the use, cost, quality, delivery, organisation, financing and outcomes of health care  
48  
49  
50  
51  
52  
53  
54  
55  
56  
57  
58  
59  
60

1  
2  
3 services. This is used to identify new knowledge about the structure, processes, and effect of health  
4 systems for individuals and populations[6]. This is the first systematic review to provide a summary of  
5 the organisation of care delivery in recovery, and its impact on patient outcomes after recovery room  
6 discharge. In presenting these finding, we hope to highlight the need for further research to help  
7 improve the care of patients in the post-operative period.  
8  
9  
10  
11  
12

### 13 **Objectives**

14  
15 The objective of this systematic review was to investigate any health system initiatives undertaken in  
16 operating suite recovery rooms, in the post-operative period, that have been shown to improve  
17 outcomes after PACU discharge, for adult, non-cardiac surgical patients. Important outcomes included  
18 mortality, morbidity, return to theatre, unplanned ICU admission and length of hospital stay.  
19 Prospective and retrospective randomised control trials, cohort studies, case control studies and  
20 comparison studies were included for analysis.  
21  
22  
23  
24  
25

### 26 **METHODS**

#### 27 **Protocol and registration**

28  
29 A review protocol was developed in line with the Preferred Reporting of Observational Studies and  
30 Meta-Analysis (PRISMA) statement by the author team prior to commencing the systematic review.  
31 This protocol is registered on the International Prospective Register of Systematic Reviews  
32 (PROSPERO) database, registration number CRD42018106093.  
33  
34  
35  
36  
37

#### 38 **Patient and Public Involvement**

39  
40 As this is a systematic review of pre-existing literature, patients and the public were not involved in  
41 study design. However, this systematic review forms part of a broader research topic on post-  
42 operative care, and how to face the challenge of increasing post-operative complication rates. In 2012,  
43 the WHO estimated the global volume of surgery to be 312.9 million operations, an increase of 38.2%  
44 compared to 2004, resulting in a mean global surgical rate of 4469 operations per 100 000 people per  
45 year [7]. With an ageing population and increasing prevalence of comorbidities, post-operative  
46 complications are now at pandemic levels [8]. Investigating alternative health care systems and care  
47 delivery models is paramount to combatting this issue. It should be apriority of both patients and  
48 service providers, as it has the potential to provide great benefit to the broader population.  
49  
50  
51  
52  
53  
54  
55

#### 56 **Eligibility criteria**

57  
58  
59  
60

1  
2  
3 Included studies investigated health system initiatives in the PACU, in the post-operative period, up  
4 to 48 hours post-operatively. Adult patient groups were the primary focus, however, studies that  
5 included a small cohort of children were not automatically excluded. Studies that explored the  
6 relationship between interventions in recovery and mortality, morbidity, hospital length of stay,  
7 unplanned ICU admission and return to theatre were included. Varying study designs were eligible for  
8 inclusion; such as randomised control trials, cohort studies, case control studies and before and after  
9 studies. Cross-sectional studies and case reports were excluded. Only studies published from 1990  
10 onwards were included, to focus on up to date clinical practice, and minimise the inclusion of  
11 irrelevant data. Studies published in a language other than English, grey literature and studies  
12 focussing solely on ambulatory surgery were excluded.  
13  
14  
15  
16  
17  
18  
19  
20  
21

### 22 **Information sources and search strategy**

23 Medical Subject Headings (MeSH) terms were generated from the NCBI PubMed advanced search area  
24 with the assistance of the University of Adelaide Health Sciences librarian. Logic grids were used as a  
25 tool, to replicate the search throughout the three databases; NCBI PubMed, EMBASE, and Cumulative  
26 Index to Nursing and Allied Health Literature (CINAHL). The full electronic search strategy for the  
27 PubMed database is presented in Appendix 1. This search strategy was utilized across the three  
28 databases from 23/3/18 to 8/4/18 to yield the articles screened for inclusion in the review.  
29  
30  
31  
32  
33  
34

### 35 **Study selection**

36 Search results from each data base were recorded, and imported into EndNote 8 (Clarivate Analytics,  
37 Boston, USA). Key word searching was also performed to identify new studies that had not yet been  
38 assigned indexing terms for the databases. Reference lists from key articles were also reviewed to  
39 identify further papers that may have been relevant to the review. Titles and abstracts were screened  
40 by one reviewer (CL), who was not blinded to journal titles or to the study authors or institutions.  
41 Articles selected for full text review were reviewed by two reviewers (CL and GL), and any  
42 discrepancies arising regarding the relevance of a study were resolved by consulting a third party. The  
43 list of references for inclusion was sent to all authors to ensure consensus.  
44  
45  
46  
47  
48  
49  
50  
51

### 52 **Data collection process**

53 The Cochrane Data Extraction Template for Included Studies from their consumers and  
54 communication page, was used as a base for our data extraction form. This form was piloted on two  
55 initial studies for usability, with no further modifications required. One reviewer extracted the initial  
56 data from each study (CL), and this data was confirmed by a second reviewer (GL) before inclusion in  
57  
58  
59  
60

1  
2  
3 the review. One study only included data in pictorial form, and an attempt was made to contact the  
4 authors to obtain the raw data. Unfortunately, this was unsuccessful.  
5  
6  
7

### 8 **Data items**

9  
10 Data items extracted from each study included patient population and characteristics, intervention  
11 aims and methods, comparison groups and outcome measures. These data items are presented in the  
12 Characteristics of Included Studies Tables.  
13  
14  
15

### 16 **Risk of bias in individual studies**

17  
18 Risk of bias in individual studies was assessed by two reviewers (CL and GL) using Gate-Lite and Robins-  
19 I (previously known as A Cochrane Risk of Bias Assessment Tool: for Non-Randomized Studies of  
20 Interventions (ACROBAT-NRSI)). Narrative synthesis of data placed more weight on higher quality  
21 studies, however, all studies and their results are presented, with caveats to highlight the individual  
22 biases that will affect interpretations of results.  
23  
24  
25  
26  
27

### 28 **Summary measures and planned methods of analysis**

29  
30 Narrative synthesis of data was the principle summary measure. This was due to the differing study  
31 designs and variable outcome measures in each study. Meta-analysis was not appropriate for the data  
32 in this systematic review. All data is presented individually, in relation to each study, with further  
33 narrative synthesis to summarise results. Results from studies were unable to be combined due to the  
34 variation in primary and secondary outcome measures, and differences in study design. No additional  
35 analysis or subgroup analysis was performed during this systematic review.  
36  
37  
38  
39  
40  
41

### 42 **Risk of bias across studies**

43  
44 Risk of bias across studies was assessed by two reviewers (CL and GL), using the Cochrane Risk of Bias  
45 Tool, and discussing any evident publication bias or selective reporting.  
46  
47

## 48 **RESULTS**

### 49 **Study selection**

50  
51 Database results, and numbers of studies screened are presented in the flow diagram (Figure 1). All  
52 references were imported into EndNote 8 for title and abstract screening. One reviewer (CL)  
53 screened all titles and abstracts, with ambiguous studies included for full text review. 14 studies  
54 were selected for full text review. Full text reviews were completed by two reviewers (CL and GL),  
55  
56  
57  
58  
59  
60

and 8 studies were selected for inclusion in the review. A summary of included and excluded studies was sent to the third and fourth authors for consensus.

### Study characteristics

Of the eight studies included, four of the included studies were retrospective cohort studies[9-12], two were observational cohort studies[13, 14], one was a prospective non-randomised pre-post intervention study[15], and one was a prospective randomised cohort study[16]. Study characteristics for each of the included studies are outlined in the Characteristics of Included Studies Summary Table (Table 1). Four studies investigated the use of PACU as a non-ICU pathway for post-operative patients[9, 11, 13, 14]. Two investigated the implementation of physiotherapy in PACU, and the impact on patient outcomes[12, 16]. One evaluated the use of a new nursing scoring tool, and its impact on recognition of patient deterioration in PACU[15], and one evaluated the implementation of a two-track clinical pathway in PACU, and the effect on patient outcomes[10]. All studies focussed primarily on adults, but one included small cohort of children[11]. Common outcome measures included in-hospital mortality, PACU length of stay and hospital length of stay. Further details regarding patient population characteristics, study methodology and outcome measures are also outlined in the supplementary tables published online (supplementary file).

**Table 1. Characteristics of Included Studies Summary Table**

| Source                                     | Aim                                                                                                                                                                               | Study Design                                                    | Number of arms/groups                                                                                                                                      | Population                                                                                                                            | Intervention                                                                                                                    | Comparison group                                                        | Outcome measures                                                                                      |
|--------------------------------------------|-----------------------------------------------------------------------------------------------------------------------------------------------------------------------------------|-----------------------------------------------------------------|------------------------------------------------------------------------------------------------------------------------------------------------------------|---------------------------------------------------------------------------------------------------------------------------------------|---------------------------------------------------------------------------------------------------------------------------------|-------------------------------------------------------------------------|-------------------------------------------------------------------------------------------------------|
| Callaghan, Lynch et al. 2005 (n= 178)      | To determine the safety of introducing non-ICU pathways for selected patients. And evaluate the effect on cost, ICU beds availability and cancellation rates of elective surgery. | Retrospective cohort study.                                     | Intervention group: patients selected for overnight intensive recovery. Comparison group: patients booked for an elective ICU admission.                   | All patients undergoing elective open aortic surgery between 1/01/98 and 31/12/02.                                                    | (n= 152)<br>Introduction of OIR (Overnight Intensive Recovery)                                                                  | (n= 26)<br>Elective post-operative ICU bed                              | In hospital mortality<br>In hospital morbidity<br>Post-operative length of stay<br>ICU length of stay |
| Eichenberger, Haller et al. 2011 (n= 6375) | To assess the impact of a clinical pathway implemented in a post-anaesthesia care unit on post-operative outcomes.                                                                | Retrospective cohort study based on electronic patient records. | Fast track: nurse driven, ASA 1-2.<br>Slow track: physician driven, ASA 3-5 who have undergone minor or major surgery, or developed post-op complications. | All elective and non-elective inpatients, who underwent a surgical or endoscopic procedure under anaesthesia during the study period. | (n= 3345)<br>Introduction of a two-track clinical pathway that clearly defined & coordinated medical and nursing interventions. | (n= 3030)<br>Pre-existing PACU conditions without the clinical pathway. | PACU length of stay<br>In-hospital mortality<br>Unplanned ICU admissions after PACU stay.             |



1  
2  
3  
4  
5  
6  
7  
8  
9  
10  
11  
12  
13  
14  
15  
16  
17  
18  
19  
20  
21  
22  
23  
24  
25  
26  
27  
28  
29  
30  
31  
32  
33  
34  
35  
36  
37  
38  
39  
40  
41  
42  
43  
44  
45  
46  
47  
48  
49  
50  
51  
52  
53  
54  
55  
56  
57  
58  
59  
60

|                                                  |                                                                                                                                                                                                                   |                                                         |                                                                                                                                                      |                                                                                                                 |                                                                        |                                                                     |                                                                                                                                                 |
|--------------------------------------------------|-------------------------------------------------------------------------------------------------------------------------------------------------------------------------------------------------------------------|---------------------------------------------------------|------------------------------------------------------------------------------------------------------------------------------------------------------|-----------------------------------------------------------------------------------------------------------------|------------------------------------------------------------------------|---------------------------------------------------------------------|-------------------------------------------------------------------------------------------------------------------------------------------------|
|                                                  |                                                                                                                                                                                                                   |                                                         | Comparison group: Pre-existing PACU conditions without the clinical pathway.                                                                         |                                                                                                                 |                                                                        |                                                                     |                                                                                                                                                 |
| Fraser and Nair 2016<br>(n= 119)                 | To assess if elective surgical patients were stable enough to return to the general ward after a stay in Extended Recovery instead of being routinely admitted to ICU                                             | Observational cohort study.                             | One arm. No control group                                                                                                                            | Elective surgical patients who would have previously been booked for level 2 care post-operatively.             | (n= 119)<br><br>Opening of an extended recovery unit.                  | Nil                                                                 | Discharge destination after extended recovery unit admission                                                                                    |
| Kastrup, Seeling et al. 2012<br>(n= 51090)       | To evaluate the effect of around-the-clock intensivist PACU coverage on the structure of ICU, and to demonstrate the economic effect on the hospital.                                                             | Retrospective cohort study.                             | Intervention group: after the introduction of 24-hour intensivist coverage. Comparison group: prior to introduction of 24-hour intensivist coverage. | All patients undergoing a surgical procedure (adults and children) between 1/01/08 – 30/04/11.                  | (n= 26118)<br><br>Introduction of 24-hour intensivist coverage in PACU | (n= 24972)<br><br>Pre-existing PACU with no intensivist coverage    | PACU LOS<br>ICU LOS<br>Pre-operative days<br>Hospital LOS<br>Case mix index<br>Cost                                                             |
| Schweizer, Khatchaturian et al. 2002<br>(n= 933) | To assess the impact of a new PACU on ICU utilisation, hospital length of stay and complications following major non-cardiac surgery.                                                                             | Observational cohort study.                             | Intervention group: after opening of a new PACU. Control group: before opening of the new PACU                                                       | Adult patients undergoing abdominal aortic reconstruction or resection of lung cancer during the study periods. | (n= 485)<br><br>Opening of a new PACU (post-anaesthesia care unit)     | (n= 448)<br><br>Pre-existing PACU                                   | Mortality<br>Reoperation<br>Secondary admission to ICU<br>Post-operative complications<br>Hospital LOS                                          |
| Street, Phillips et al. 2017<br>(n= 1417)        | To evaluate whether use of a discharge criteria tool for nursing assessment of patients in PACU would enhance nurses' recognition and response to patients at-risk of deterioration and improve patient outcomes. | Prospective non-randomised pre-post intervention study. | Intervention group: after the implementation of the Post-Anaesthetic Care Tool (PACT) Comparison group: prior to the implementation of PACT.         | All adult patients undergoing elective surgery on days of data collection.                                      | (n= 694)<br><br>Implementation of a Post Anaesthesia Care Tool (PACT)  | (n= 723)<br><br>Standard PACU care without PACT                     | Nursing management of symptoms<br>Rates of adverse events<br>Mortality<br>PACU LOS<br>Hospital LOS<br>Health service usage and healthcare costs |
| Tayrose, Newman et al. 2013<br>(n= 900)          | To address the impact of rapid rehabilitation beginning in the recovery room on length-of-                                                                                                                        | Retrospective cohort study.                             | Intervention group: rapid rehabilitation group. Comparison group: standard                                                                           | 900 consecutive hip and knee arthroplasty patients                                                              | (n= 331)<br><br>Rapid rehabilitation pilot program where the first     | (n= 569)<br><br>Remainder of cases received standard rehabilitation | Overall hospital LOS<br>Hip arthroplasty subgroup LOS<br>Knee                                                                                   |

1  
2  
3  
4  
5  
6  
7  
8  
9  
10  
11  
12  
13  
14  
15  
16  
17  
18  
19  
20  
21  
22  
23  
24  
25  
26  
27  
28  
29  
30  
31  
32  
33  
34  
35  
36  
37  
38  
39  
40  
41  
42  
43  
44  
45  
46  
47  
48  
49  
50  
51  
52  
53  
54  
55  
56  
57  
58  
59  
60

|                                    |                                                                                                                                                                                          |                                     |                                                                                                                                                                      |                                                                                      |                                                                     |                                                                            |                                                                        |
|------------------------------------|------------------------------------------------------------------------------------------------------------------------------------------------------------------------------------------|-------------------------------------|----------------------------------------------------------------------------------------------------------------------------------------------------------------------|--------------------------------------------------------------------------------------|---------------------------------------------------------------------|----------------------------------------------------------------------------|------------------------------------------------------------------------|
|                                    | stay after primary hip and knee arthroplasty.                                                                                                                                            |                                     | rehabilitation protocol                                                                                                                                              |                                                                                      | two cases of the day were mobilised in the recovery room.           | protocol starting on the morning of post-operative day one.                | arthroplasty subgroup LOS                                              |
| Zoremba, Dette et al. 2009 (n= 60) | To evaluate the impact of short-term respiratory physiotherapy during the PACU stay, on postoperative lung function tests and pulse oximetry values in obese adults after minor surgery. | Prospective randomised cohort study | Intervention group: physical therapy treatment group that performed incentive spirometry in the PACU<br>Control group: patients who did not undergo physical therapy | 60 obese adult patients (BMI 30-40) ASA 2-3, scheduled for minor peripheral surgery. | (n= 30)<br><br>Patients performed incentive spirometry in the PACU. | (n= 30)<br><br>Not instructed to do any breathing exercises or spirometry. | Pulse oximetry and spirometry at 1, 2, 6 and 24 hours post-operatively |

**Risk of bias within studies**

The overall risk of bias within studies was serious. Critical risk of bias was identified in two studies[12, 13], serious risk of bias in three studies[9, 14, 15], moderate risk of bias in one study[11] and low risk of bias in two studies[10, 16]. Significant patient selection and allocation bias was the most common identified cause[9, 11, 12, 14, 15]; as patients in these studies were not randomly allocated to their post-operative level of care. The most clinically unwell patients were sent to ICU automatically, and only the lower risk patients, as deemed by the treating teams, were allowed a trial of care in the PACU. The relatively small numbers of participants in each study, with the exception of Kastrup et al, also introduces a significant risk of bias; as these studies were not adequately powered to assess critical outcomes such as mortality, and other serious post-operative complications. Articles that were considered as being of serious and critical risk of bias, were still included in the review, due to the sparse literature available. The risk of bias summary table (Table 2) provides further analysis, and comment regarding the risk of bias within individual studies.

**Table 2. Risk of Bias Summary Table**

| Source | Bias Due to Confounding | Bias in Selection & Allocation of Participants | Bias in Measurement of Interventions | Bias Due to Departures from Intended Interventions | Bias Due to Missing Data | Bias in Measurement of Outcomes | Bias in Selection of Reported Results | Overall Risk of Bias Judgement | Comments |
|--------|-------------------------|------------------------------------------------|--------------------------------------|----------------------------------------------------|--------------------------|---------------------------------|---------------------------------------|--------------------------------|----------|
|--------|-------------------------|------------------------------------------------|--------------------------------------|----------------------------------------------------|--------------------------|---------------------------------|---------------------------------------|--------------------------------|----------|

1

2

|                                                                                                                |                                             |          |          |          |          |          |          |          |          |                                                                                                                                                                                                                                                                                      |
|----------------------------------------------------------------------------------------------------------------|---------------------------------------------|----------|----------|----------|----------|----------|----------|----------|----------|--------------------------------------------------------------------------------------------------------------------------------------------------------------------------------------------------------------------------------------------------------------------------------------|
| 3<br>4<br>5<br>6<br>7<br>8<br>9<br>10<br>11<br>12<br>13<br>14                                                  | Callaghan,<br>Lynch et al.<br>2005          | Low      | Serious  | Low      | Moderate | Low      | Moderate | Low      | Serious  | Significant selection bias of lower risk patients who were sent to OIR. Used predictive values for mortality (based on POSSUM variables) as a comparison measure.                                                                                                                    |
| 15<br>16<br>17<br>18<br>19                                                                                     | Eichenberger,<br>Keller et al.<br>2011      | Low      | High quality study. No specific concerns from review authors.                                                                                                                                                                                                                        |
| 20<br>21<br>22<br>23<br>24<br>25<br>26<br>27                                                                   | Fraser and Nair<br>2016                     | Low      | Moderate | Moderate | Moderate | Critical | Serious  | Moderate | Critical | Over 25% of data missing. No clear objective stated, no explanation of methodology. Poorly defined selection criteria.                                                                                                                                                               |
| 28<br>29<br>30<br>31<br>32<br>33<br>34<br>35<br>36<br>37<br>38<br>39<br>40<br>41                               | Kastrup,<br>Seeling et al.<br>2012          | Low      | Serious  | Low      | Moderate | Low      | Low      | Low      | Moderate | Significant selection bias of patients allocated to PACU, intermediate care unit or ICU by intensive care physician. This study also included a population of children (numbers not given).                                                                                          |
| 42<br>43<br>44<br>45<br>46<br>47<br>48<br>49<br>50<br>51<br>52<br>53<br>54<br>55<br>56<br>57<br>58<br>59<br>60 | Schweizer,<br>Khatchatourian<br>et al. 2002 | Critical | Serious  | Low      | Low      | Low      | Low      | Low      | Serious  | Introduction of preoperative risk assessment guidelines (AHA/ACC) with increased antiadrenergic administration pre-operatively confounds results. Significant selection bias, no admission criteria stated for PACU or ICU. Patient allocation was determined by treating clinician. |

1  
2  
3  
4  
5  
6  
7  
8  
9  
10  
11  
12  
13  
14  
15  
16  
17

18  
19  
20  
21  
22  
23  
24  
25  
26  
27  
28  
29  
30  
31  
32

33  
34  
35  
36  
37  
38

39  
40  
41  
42  
43  
44  
45  
46  
47  
48  
49  
50  
51  
52  
53  
54  
55  
56  
57  
58  
59  
60

|                              |     |          |         |          |     |         |          |          |                                                                                                                                                                                                                                             |
|------------------------------|-----|----------|---------|----------|-----|---------|----------|----------|---------------------------------------------------------------------------------------------------------------------------------------------------------------------------------------------------------------------------------------------|
| Street, Phillips et al. 2017 | Low | Serious  | Low     | Moderate | Low | Serious | Critical | Serious  | Power analysis included all patients (including day surgery) when investigating post-operative outcomes after PACU discharge, giving inaccurate results. Poor objective (with different objectives stated in the abstract and the article). |
| Rayrose, Newman et al. 2013  | Low | Critical | Serious | Moderate | Low | Serious | Low      | Critical | Patients who were deemed too unwell to be mobilised in recovery, were included in analysis for the standard recovery group. Operative order bias, by including the first two cases of the day. No methods reported for data collection.     |
| Zoremba, Dette et al. 2009   | Low | Low      | Low     | Low      | Low | Low     | Low      | Low      | Good quality study. However, does not address the longer-term outcomes of interest.                                                                                                                                                         |

**Results of individual studies**

The results of each individual study are presented in the results of included study table (Table 3). Four studies[9, 11, 13, 14] investigated non-ICU pathways for care of post-operative patients, and these pathways were not associated with increased mortality rates in three of the included studies[9, 11, 14]. However, it must be noted that due to sample size, only one study [11] was adequately powered to show a reliable difference in mortality rates, and one study[13] did not investigate mortality as an outcome measure. Admission criteria for PACU care instead of ICU care post-operatively were only stated in two of the included studies[9, 11]. Callaghan et al outlined contraindications to use of Overnight Intensive Recovery; including significantly impaired renal function, technically difficult or prolonged surgery expected, poor exercise tolerance or likelihood of requiring post-operative ventilation. However, the selection of patients was ultimately at the discretion of the attending

1  
2  
3 anaesthetist and vascular surgeon. Kastrup et al only listed planned length of stay <24 hours as their  
4 admission criteria to PACU instead of ICU or the intermediate care unit. Fraser et al did not mention  
5 their admission criteria for extended recovery care[13], and Schweizer et al admitted patients to PACU  
6 instead of ICU purely at the discretion of the attending anaesthetist[14]. Four of eight studies also  
7 examined hospital length of stay [9, 11, 12, 14], and two found the intervention was associated with  
8 decreased length of stay and two found no association (Table 3). Kastrup et al demonstrated a  
9 significant decrease in length of stay for all surgical patients after their introduction of 24-hour  
10 intensivist coverage to the PACU [11]. Tayrose et al, also demonstrated a decreased length of stay for  
11 patients who received early mobilisation in PACU[12]. However, Callaghan et al and Schweizer et al  
12 did not demonstrate any statistically significant decrease in length of stay[9, 14]. PACU length of stay  
13 was another common outcome measure in three of the included studies[10, 11, 15]. Eichenberger et  
14 al demonstrated a decreased PACU length of stay for ASA 1-2 patients, but no difference for ASA3-5,  
15 while Kastrup et al and Street both demonstrated an increase in PACU length of stay following their  
16 interventions[11, 15]. Due to the variations in study designs, we were unable to combine the data for  
17 further aggregate analysis.  
18  
19  
20  
21  
22  
23  
24  
25  
26  
27  
28  
29

30 **Table 3. Results of Included Studies**

| 31 Source                                 | 32 Intervention                                                                                                                    | 33 Mortality                                                                                                                                                                                                        | 34 Other Key results                                                                                                                                                                                                                                                                                                                                                                                                                                                                                                                                                                                                                                                                                                                                                       |
|-------------------------------------------|------------------------------------------------------------------------------------------------------------------------------------|---------------------------------------------------------------------------------------------------------------------------------------------------------------------------------------------------------------------|----------------------------------------------------------------------------------------------------------------------------------------------------------------------------------------------------------------------------------------------------------------------------------------------------------------------------------------------------------------------------------------------------------------------------------------------------------------------------------------------------------------------------------------------------------------------------------------------------------------------------------------------------------------------------------------------------------------------------------------------------------------------------|
| 35 Callaghan, Lynch et al.<br>36 2005     | 37 Introduction of OIR<br>(Overnight Intensive<br>38 Recovery)                                                                     | 39 No significant difference<br>between groups. Overall in<br>hospital mortality was 2%.<br>fewer than predicted<br>patients died (observed<br>mortality 3 versus predicted<br>95% CI 8-21).                        | 40 Morbidity: No significant difference between groups. Overall, fewer<br>than predicted patients experienced one or more complications<br>(observed 101 versus predicted morbidity 103-125 95%CI)<br>Hospital length of stay: No significant difference between groups                                                                                                                                                                                                                                                                                                                                                                                                                                                                                                    |
| 41 Eichenberger, Haller et al.<br>42 2011 | 43 Introduction of a two-<br>track clinical pathway<br>that clearly defined &<br>coordinated medical and<br>nursing interventions. | 44 Overall in-hospital mortality<br>decreased significantly from<br>68 patients (1.5%) to 39<br>patients (0.8%) (P<0.001). In<br>ASA 3-5 patients, mortality<br>was nearly halved (adjusted<br>OR 0.40) (P< 0.001). | 45 Unplanned ICU admission: Total number of unplanned ICU<br>admissions after stay in PACU decreased from 113 (2.5%) to 90<br>(1.9%) (adjusted OR 0.70) (P=0.70)<br>PACU length of stay: After adjustment for differences in patients<br>and procedures. Statistically significant decrease in PACU length of<br>stay for ASA 1-2 patients (adjusted P< 0.001). There was no<br>difference for ASA 3-5 patients (adjusted P= 0.768)                                                                                                                                                                                                                                                                                                                                        |
| 46 Fraser and Nair 2016                   | 47 Opening of an extended<br>recovery unit.                                                                                        | 48 Not investigated                                                                                                                                                                                                 | 49 Discharge destination after extended recovery unit admission: Data<br>from the first 119 patients admitted to the Extended Recovery unit<br>were collected. 76 patients (63.9%) who would have otherwise gone<br>to critical care were able to go back to the ward.                                                                                                                                                                                                                                                                                                                                                                                                                                                                                                     |
| 50 Kastrup, Seeling et al. 2012           | 51 Introduction of 24-hour<br>intensivist coverage in<br>PACU                                                                      | 52 No difference between<br>groups                                                                                                                                                                                  | 53 Hospital length of stay: Overall length of stay decreased significantly<br>for all surgical patients. From 8.3 (+/- 11.8) days to 7.71 (+/- 10.99)<br>days.<br>PACU length of stay: More patients were treated in the PACU for a<br>longer period of time. Mean LOS increased from 0.27 (+/- 0.2) days<br>to 0.45 (+/- 0.41) days<br>Cases treated in ICU: Mean number of cases treated in the ICU per<br>month decreased significantly from 164.7 (+/- 14.37) to 133.8 (+/-<br>19.42) (P<0.001)<br>ICU treatment days: Mean number of treatment days per month did<br>not change. Relative number of patients with longer LOS (>7 days)<br>increased after introduction of PACU, whereas average number of<br>patients staying <24 hours in the ICU decreased by ~50%. |

|                                                                    |                                       |                                                                                                              |                                           |                                                                                                                                                                                                                                                                                                                                                                                                                                                                                                                                                                                                                                                                                                                                |
|--------------------------------------------------------------------|---------------------------------------|--------------------------------------------------------------------------------------------------------------|-------------------------------------------|--------------------------------------------------------------------------------------------------------------------------------------------------------------------------------------------------------------------------------------------------------------------------------------------------------------------------------------------------------------------------------------------------------------------------------------------------------------------------------------------------------------------------------------------------------------------------------------------------------------------------------------------------------------------------------------------------------------------------------|
| 3<br>4<br>5<br>6<br>7                                              | Schweizer, Khatchatourian et al. 2002 | Opening of a new PACU (post-anaesthesia care unit)                                                           | No difference between study periods       | Morbidity: Vascular patients had decreased rates of myocardial infarction (6.4% vs 1.3% p=0.009) and decreased rates of pulmonary oedema (5.1% vs 1.7% p=0.08)<br>Re-operation: No difference between study periods<br>Hospital length of stay: Total hospital length of stay did not change over time                                                                                                                                                                                                                                                                                                                                                                                                                         |
| 8<br>9<br>10<br>11<br>12<br>13<br>14<br>15<br>16<br>17<br>18<br>19 | Street, Phillips et al. 2017          | Implementation of a Post Anaesthesia Care Tool (PACT)                                                        | No significant difference between groups. | Patient management in PACU: More requests for medical review 19% vs 30% (P=<0.001), more patients with MET criteria modified by an anaesthetist 6.5% vs 13.8% (P<0.001), higher rates of analgesia administration 37.3% vs 54.2% (P=0.001).<br>Adverse events in PACU: More adverse events recorded in PACU in phase 2, 29.4% vs 21.2% (P<0.001). May represent a greater recognition of adverse events in PACU after implementation of PACT.<br>Adverse events after PACU: Significant decrease in rates of clinical deterioration and significant decrease in cardiovascular events after PACU discharge.<br>PACU length of stay: Increase in median PACU length of stay from 45min in phase 1 to 53min in phase 2 (P<0.001) |
| 20<br>21<br>22<br>23<br>24<br>25                                   | Tayrose, Newman et al. 2013           | Rapid rehabilitation pilot program where the first two cases of the day were mobilised in the recovery room. | Not investigated                          | Overall hospital length of stay: Rapid rehabilitation had significantly decreased length of stay that patient who began therapy on post-op day 1 (P<0.001).<br>Hip arthroplasty subgroup length of stay: Decreased length of stay for rapid rehab patients in the hip arthroplasty subgroup (P<0.001).<br>Knee arthroplasty subgroup length of stay: Decreased LOS for rapid rehab patients in the knee arthroplasty subgroup (P=0.16).                                                                                                                                                                                                                                                                                        |
| 26<br>27<br>28<br>29<br>30<br>31<br>32<br>33<br>34<br>35           | Zoremba, Dette et al. 2009            | Patients performed incentive spirometry in the PACU.                                                         | Not investigated                          | Pulse oximetry: Significantly improved pulse oximetry values at 1 and 2 hours in PACU, and at 6 hours post mobilisations (P<0.0001), and significant improvement in pulse oximetry values at 24 hours post-op (P<0.0001).<br>Spirometry results: Incentive spirometry group recovered lung function faster in during the PACU stay (P<0.0001). Lung function had almost reached baseline at 6 hours in the incentive spirometry group, however the control group were up to 25% below baseline (P<0.0001). Overall difference in lung function between groups had decreased 24 hours after surgery, but significant differences still remained (P=0.0040).                                                                     |

### Synthesis of results

The overall quality of studies was poor, with significant selection and allocation bias; however, managing post-operative patients outside of the ICU is not associated with worse patient outcomes, especially in an extended recovery setting. There was no increase in mortality rates identified in three of the studies investigating non-ICU pathways for post-operative patients[9, 11, 14], and the fourth did not investigate mortality as an outcome measure[13]. Use of extended recovery also meant that ward discharge was usual, bypassing the ICU[9, 13]. Kastrup et al showed that the addition of intensivist coverage to PACU was associated with decreased length of hospital stay, and Tayrose et al demonstrated that early mobilisation in PACU was associated with decreased length of hospital stay, but significant pre-selection bias for early mobilisation of arthroplasty patients confounds results[12]. Other changes to the PACU environment, including the opening of a new PACU[14] and introduction of Overnight Intensive Recovery[9] did not appear to have any effect on hospital length of stay. The use of a two-track pathway for nurse-driven and physician-driven PACU management and discharge appears to be beneficial in reducing PACU length of stay, and improving outcomes after discharge

1  
2  
3 from PACU, including a significant decrease in post-operative mortality[10]. However, introduction of  
4 a Post Anaesthetic Care Tool, and introduction of 24-hour intensivist coverage in PACU was associated  
5 with increased length of stay in PACU[11, 15]. While incentive spirometry in PACU did improve pulse  
6 oximetry values and lung function for the first 24 hours post-operatively, there were no long-term  
7 positive effects investigated, or identified[16]. It must be noted that the risk of bias of the included  
8 studies modifies results. Critical risk of bias was identified in two studies[12, 13], serious risk of bias in  
9 three studies[9, 14, 15], moderate risk of bias in one study[11] and low risk of bias in two studies[10,  
10 16]. Only one of the included studies was adequately powered[11], and reliable conclusions cannot  
11 be drawn from single studies with such small datasets.  
12  
13  
14  
15  
16  
17  
18  
19

### 20 **Risk of bias across studies and additional analyses**

21 Risk of bias across studies for the key common outcome measures of mortality, hospital length of stay  
22 and PACU length of stay was high due to the study designs, with no level I or II evidence available.  
23 There was no additional analysis required for this review.  
24  
25  
26  
27

## 28 **DISCUSSION**

### 29 **Summary of evidence**

30 Of the eight studies included in this systematic review, only one was a prospective randomised cohort  
31 study[16], and one was a prospective non-randomised pre-post intervention study[15]. The rest were  
32 observational and retrospective cohort studies[9-14]. There was no level I or level II evidence available  
33 for inclusion in this review. Common outcome measures identified, included mortality, hospital length  
34 of stay and PACU length of stay. Despite the poor quality of evidence, we found that managing  
35 selected higher risk post-operative patients in the PACU instead of ICU was not associated with worse  
36 outcomes[9, 11, 13, 14], and may be associated with decreased unnecessary ICU admissions, with  
37 potential large cost savings. However, due to study types, small participant numbers, and the  
38 significant selection and allocation bias of patients within these studies, the overall strength of  
39 evidence is only moderate. Unfortunately, only two of the included studies stated the admission  
40 criteria for PACU care instead of ICU care post-operatively[9, 11], making the use of this finding to  
41 guide care difficult, with further research into risk stratification of patients needed. The addition of  
42 intensivist coverage to PACU was associated with decreased hospital length of stay in one study [11],  
43 as was the rapid mobilisation of arthroplasty patients[12]. However, the introduction of overnight  
44 intensive recovery and the opening of a new PACU had no effect on hospital length of stay[9, 14]. The  
45 introduction of a two-track clinical pathway appeared to be associated with a decreased PACU length  
46 of stay[10], however the introduction of a Post Anaesthesia Care Tool and introduction of intensivist  
47  
48  
49  
50  
51  
52  
53  
54  
55  
56  
57  
58  
59  
60



1  
2  
3 coverage was associated with increased PACU length of stay[11, 15]. Only one of the included studies  
4 was adequately powered [11], and we are unable to draw accurate conclusions from single studies  
5 with such small participant numbers. This has significant implications for future research and health  
6 resource allocation. Further studies that prospectively randomly allocate patients to a treatment arm  
7 would be of great value, however, we acknowledge that due to the risk profile and care requirements  
8 of surgical patients, this may not be possible until further safety is proven.  
9  
10  
11  
12  
13

### 14 15 **Limitations**

16 The protocol development and search strategy for this review were developed in accordance with the  
17 PRISMA statement. With help from experienced health science research librarians, we attempted to  
18 ensure that all references were captured; however, it is possible that studies were missed. Due to the  
19 variation in study design and primary outcome measures, we were unable to combine data for  
20 aggregate analysis or meta-analysis. The narrative synthesis of key results may introduce bias;  
21 however, steps were taken to minimise this, including the review of all data by a second author. The  
22 most significant limitation of this systematic review, was the high risk of bias within the individual  
23 studies included in the review. Selection and allocation bias, missing data, inclusion of inappropriate  
24 patient groups such as day surgery, and lack of fidelity assessment were some of the key flaws within  
25 each study. However, the thorough risk of bias assessment and its implications on reported results  
26 allows readers to interpret the data appropriately.  
27  
28  
29  
30  
31  
32  
33  
34  
35  
36

### 37 **Conclusions**

38 Managing selected post-operative patients in PACU instead of ICU does not appear to be associated  
39 with worse patient outcomes, however due to study design, and the high risk of bias within studies,  
40 the strength of evidence is moderate at best. The addition of intensivist coverage to PACU and early  
41 mobilisation was associated with decreased hospital length of stay. While the use of a two-track  
42 clinical pathway decreased PACU length of stay, however there is no evidence of this improving  
43 patients' overall outcomes. This is the first systematic review to investigate the health system  
44 initiatives undertaken in recovery rooms, and their impact on patient outcomes after PACU discharge.  
45 There is a striking paucity of literature on this topic, with very few high-quality studies; and further  
46 research is required to evaluate and improve the care of post-operative patients in the recovery room  
47 setting.  
48  
49  
50  
51  
52  
53  
54  
55  
56

### 57 **FUNDING**



1  
2  
3 This systematic review was undertaken as part of a Masters of Clinical Sciences with the University of  
4 Adelaide, funded by the Australian Government's Research Training Program (Commonwealth  
5 funded).  
6  
7  
8  
9

### 10 **COMPETING INTERESTS**

11 No conflicts of interest known at the time of writing the review. Affiliations; The Royal Adelaide  
12 Hospital and the University of Adelaide.  
13  
14  
15

### 16 **AUTHOR STATEMENT**

17 CL developed the review protocol, completed all title and abstract screening, full text reviews and data  
18 analysis. She completed the risk of bias assessment with GL. CL also drafted and revised the  
19 manuscript. GL developed the initial review question, and assisted writing the review protocol. He  
20 also completed the full text reviews, reviewed all data of included studies and completed the risk of  
21 bias assessment with CL. He also critically appraised the draft manuscript. DS assisted with developing  
22 the initial review question, and reviewed all included articles for consensus. He also critically appraised  
23 the draft manuscript, and assisted with revisions. GM reviewed all included articles for consensus, and  
24 critically appraised the manuscript. All authors have given final approval for publication. There were  
25 no other contributors.  
26  
27  
28  
29  
30  
31  
32  
33  
34

### 35 **DATA SHARING STATEMENT**

36 There was no new data produced by this research. Data extracted from the original studies is available  
37 in the online supplementary tables.  
38  
39  
40  
41

### 42 **FIGURE LEGEND**

43 Figure 1: Flow diagram for selection of studies included in review  
44  
45  
46

### 47 **REFERENCES**

- 48 1. Zuck, D., *Anaesthetic and Postoperative Recovery Rooms. Some notes on their early history.* Anaesthesia, 1995. **50**: p. 435-438.
- 49 2. Aps, C., *Surgical critical care: the Overnight Intensive Recovery (OIR) concept.* Br J Anaesth, 2004. **92**(2): p. 164-6.
- 50 3. Swart, M., J.B. Carlisle, and J. Goddard, *Using predicted 30 day mortality to plan postoperative colorectal surgery care: a cohort study.* Br J Anaesth, 2017. **118**(1): p. 100-104.
- 51 4. Bellomo, R., et al., *A before and after trial of the effect of a high-dependency unit on post-operative morbidity and mortality.* Crit Care Resusc, 2005. **7**(1): p. 16-21.
- 52 5. Katz, S.G. and R.D. Kohl, *Selective use of the intensive care unit after nonaortic arterial surgery.* J Vasc Surg, 1996. **24**(2): p. 235-9.
- 53  
54  
55  
56  
57  
58  
59  
60

6. Institute of Medicine Committee on Health Services Research, T. and I. Work Force, in *Health Services Research: Opportunities for an Expanding Field of Inquiry: An Interim Statement*, S. Thaul, K.N. Lohr, and R.E. Tranquada, Editors. 1994, National Academies Press (US): Washington (DC).
7. Weiser, T.G., et al., *An estimation of the global volume of surgery: a modelling strategy based on available data*. *Lancet*, 2008. **372**(9633): p. 139-44.
8. Ludbrook, G., *Hidden pandemic of postoperative complications-time to turn our focus to health systems analysis*. *Br J Anaesth*, 2018. **121**(6): p. 1190-1192.
9. Callaghan, C.J., et al., *Overnight intensive recovery: elective open aortic surgery without a routine ICU bed*. *Eur J Vasc Endovasc Surg*, 2005. **30**(3): p. 252-8.
10. Eichenberger, A.S., et al., *A clinical pathway in a post-anaesthesia care unit to reduce length of stay, mortality and unplanned intensive care unit admission*. *Eur J Anaesthesiol*, 2011. **28**(12): p. 859-66.
11. Kastrup, M., et al., *Effects of intensivist coverage in a post-anaesthesia care unit on surgical patients' case mix and characteristics of the intensive care unit*. *Crit Care*, 2012. **16**(4): p. R126.
12. Tayrose, G., et al., *Rapid mobilization decreases length-of-stay in joint replacement patients*. *Bull Hosp Jt Dis (2013)*, 2013. **71**(3): p. 222-6.
13. Fraser, C. and A. Nair, *Reducing critical care admissions after elective surgery by opening an extended recovery unit at the Northern General Hospital, Sheffield*. *Anaesthesia*, 2016. **71**: p. 50.
14. Schweizer, A., et al., *Opening of a new postanesthesia care unit: impact on critical care utilization and complications following major vascular and thoracic surgery*. *J Clin Anesth*, 2002. **14**(7): p. 486-93.
15. Street, M., et al., *Effect of a newly designed observation, response and discharge chart in the Post Anaesthesia Care Unit on patient outcomes: a quasi-expermental study in Australia*. *BMJ Open*, 2017. **7**(12): p. e015149.
16. Zoremba, M., et al., *Short-term respiratory physical therapy treatment in the PACU and influence on postoperative lung function in obese adults*. *Obes Surg*, 2009. **19**(10): p. 1346-54.

1  
2  
3  
4  
5  
6  
7  
8  
9  
10  
11  
12  
13  
14  
15  
16  
17  
18  
19  
20  
21  
22  
23  
24  
25  
26  
27  
28  
29  
30  
31  
32  
33  
34  
35  
36  
37  
38  
39  
40  
41  
42  
43  
44  
45  
46  
47  
48  
49  
50  
51  
52  
53  
54  
55  
56  
57  
58  
59  
60



Figure 1

1  
2  
3  
4  
5  
6  
7  
8  
9  
10  
11  
12  
13  
14  
15  
16  
17  
18  
19  
20  
21  
22  
23  
24  
25  
26  
27  
28  
29  
30  
31  
32  
33  
34  
35  
36  
37  
38  
39  
40  
41  
42  
43  
44  
45  
46  
47  
48  
49  
50  
51  
52  
53  
54  
55  
56  
57  
58  
59  
60

### Appendix 1.

#### PubMed Electronic Search Strategy

| Postoperative period                                                                                                                                                                                                                                                                                                                                                                                                                                                          | Adults                                                                                                                                                                                    | Recovery room                                                                                                                                                                                                                                                                                                                                 | Patient outcomes                                                                                                                                                                                                                                                                                                                                                                                                                                                                                                                                                                                                                               |
|-------------------------------------------------------------------------------------------------------------------------------------------------------------------------------------------------------------------------------------------------------------------------------------------------------------------------------------------------------------------------------------------------------------------------------------------------------------------------------|-------------------------------------------------------------------------------------------------------------------------------------------------------------------------------------------|-----------------------------------------------------------------------------------------------------------------------------------------------------------------------------------------------------------------------------------------------------------------------------------------------------------------------------------------------|------------------------------------------------------------------------------------------------------------------------------------------------------------------------------------------------------------------------------------------------------------------------------------------------------------------------------------------------------------------------------------------------------------------------------------------------------------------------------------------------------------------------------------------------------------------------------------------------------------------------------------------------|
| "Postoperative Period"[mh] OR Anesthesia[mh] OR "surgical procedures, operative"[mh] OR "perioperative period"[mh] OR "Postoperative period"[tiab] OR "post anaesthes*" [tiab] OR "post anesthes*" [tiab] OR postoperative[tiab] OR "Anesthesia recovery period"[tiab] OR "Anaesthesia recovery period"[tiab] OR anesthesia[tiab] OR anaesthesia[tiab] OR "surgical procedures"[tiab] OR surger*[tiab] OR operation*[tiab] OR operative[tiab] OR "perioperative period"[tiab] | "adult"[mh] OR adult*[tiab] OR elderly[tiab] OR "young adult*" [tiab] OR OR "young people"[tiab] OR "aged person"[tiab] OR OR "aged people"[tiab] OR "post senior*" [tiab] OR frail[tiab] | OR "recovery room"[mh] OR PACU[tiab] OR "recovery room"[tiab] OR "advanced recovery room"[tiab] OR "extended recovery room"[tiab] OR OR "post anaesthesia care unit*" [tiab] OR OR anesthesia care unit*" [tiab] OR "postanaesthesia care unit*" [tiab] OR OR "postanesthesia care unit*" [tiab] OR OR "post operative recovery unit*" [tiab] | "Patient outcome assessment"[mh] OR "treatment outcome"[mh] OR OR mortality[mh] OR "length of stay"[mh] OR "postoperative complications"[mh] OR OR reoperation*[mh] OR OR "Patient outcome assessment"[tiab] OR OR "patient outcome*" [tiab] OR OR or outcome*[tiab] OR OR "treatment outcome"[tiab] OR OR mortality[tiab] OR OR "fatal outcome*" [tiab] OR OR morbidity[tiab] OR OR "length of stay"[tiab] OR OR "postoperative complications"[tiab] OR OR "return to theatre"[tiab] OR OR complication*[tiab] OR OR "intensive care"[tiab] OR OR "intensive care admission"[tiab] OR OR "health outcome"[tiab] OR OR "adverse event*" [tiab] |

## Characteristics of Included Studies Additional Tables

### Participants additional table:

| Source                                | Location and Setting                                                                                                                                                  | Inclusion Criteria                                                                                                                                                                                                                             | Exclusion Criteria                                                                                                                                                               | Ages involved                                                                                                                      | Gender                                                                                     | Exclusion of important groups                                                                                 | Numbers involved                                       |
|---------------------------------------|-----------------------------------------------------------------------------------------------------------------------------------------------------------------------|------------------------------------------------------------------------------------------------------------------------------------------------------------------------------------------------------------------------------------------------|----------------------------------------------------------------------------------------------------------------------------------------------------------------------------------|------------------------------------------------------------------------------------------------------------------------------------|--------------------------------------------------------------------------------------------|---------------------------------------------------------------------------------------------------------------|--------------------------------------------------------|
| Callaghan, Lynch et al. 2005          | Addenbrooke's Hospital. Cambridge, United Kingdom.<br><br>Cambridge vascular unit, OIR (based in PACU) and ICU, within a major teaching hospital and research centre. | All patients undergoing elective open aortic surgery between 1/01/98 and 31/12/02.                                                                                                                                                             | Patients with missing case notes.                                                                                                                                                | Median age for all patients was 72 (66-77)                                                                                         | Intervention group: 88% males<br>Comparison group: 85% males                               | No group appears to be excluded from the study. However, some multi-morbid patients were not offered surgery. | Intervention group n=152<br>Comparison group n=26      |
| Eichenberger, Haller et al. 2011      | Geneva hospital Switzerland.<br><br>Post Anaesthesia Care Unit (PACU), within a tertiary teaching hospital.                                                           | All elective and non-elective inpatients, who underwent a surgical or endoscopic procedure under anaesthesia (including major surgery and high risk surgical patients required temporary NIV, haemodynamic support and continuous monitoring). | Exclusion: multi-trauma, persistent intraoperative shock, transplants, cardiac surgery and intra-operative respiratory failure.                                                  | Before period:<br><49yo 34.25%,<br>49-67yo 32.6%,<br>>67yo 33.3%<br>After period:<br><49yo 34.7%,<br>49-67yo 32.5%,<br>>67yo 32.8% | Intervention group: male 56.3%, female 43.7%<br>Comparison group: male 55.9%, female 44.1% | No groups excluded apart from those patients already specified in the exclusion criteria.                     | Intervention group n=3345<br>Comparison group n=3030   |
| Fraser and Nair 2016                  | Northern General Hospital Sheffield, England.<br><br>Extended recovery unit within a tertiary teaching hospital, major trauma centre.                                 | Elective surgical patients who would have previously been booked for level 2 care post-operatively. Including patients with significant comorbidities, endovascular AAA repair, carotid endarterectomy and revision arthroplasty.              | Not stated                                                                                                                                                                       | Not stated                                                                                                                         | Not stated                                                                                 | No apparent exclusion of specific population groups. Not specifically addressed.                              | Intervention group n=119                               |
| Kastrup, Seeling et al. 2012          | The Charite-University Hospital Campus Mitte Berlin, Germany. PACU within a large tertiary teaching hospital.                                                         | All patients undergoing a surgical procedure (adults and children) between 1/01/08 – 30/04/11                                                                                                                                                  | Ambulatory surgical patients, patients who were readmitted to hospital for the same reason as the initial admission (due to issues with accuracy of the administrative database) | Not given                                                                                                                          | Not stated                                                                                 | No apparent exclusion of specific population groups. Not specifically addressed.                              | Intervention group n=26118<br>Comparison group n=24972 |
| Schweizer, Khatchatourian et al. 2002 | The University Hospital of Geneva, Switzerland.<br><br>PACU within a tertiary teaching hospital.                                                                      | Adult patients undergoing abdominal aortic reconstruction or resection of lung cancer.                                                                                                                                                         | Exclusion criteria not stated                                                                                                                                                    | Not stated                                                                                                                         | Not stated                                                                                 | No apparent exclusion of specific population groups. Not specifically addressed.                              | Intervention group n= 485<br>Comparison group n= 448   |

|                                                          |                              |                                                                                                                      |                                                                                                                                                                                                                                |                                                                                                                                                                                                                                                                                                                                            |                                                                                      |                                                                                               |                                                                                                                                                                                                    |                                                    |
|----------------------------------------------------------|------------------------------|----------------------------------------------------------------------------------------------------------------------|--------------------------------------------------------------------------------------------------------------------------------------------------------------------------------------------------------------------------------|--------------------------------------------------------------------------------------------------------------------------------------------------------------------------------------------------------------------------------------------------------------------------------------------------------------------------------------------|--------------------------------------------------------------------------------------|-----------------------------------------------------------------------------------------------|----------------------------------------------------------------------------------------------------------------------------------------------------------------------------------------------------|----------------------------------------------------|
| 1<br>2<br>3<br>4<br>5<br>6<br>7                          | Street, Phillips et al. 2017 | Three hospitals within one Australian metropolitan healthcare organisation.<br><br>PACUs within the three hospitals. | All adult patients undergoing elective surgery on days of data collection before and after the implementation of PACT (before period July-Oct 2012) (after period July-Sept 2014). (Half the patients were day surgery cases.) | Emergency surgery, minor procedure only requiring sedation, post-operative planned admission to ICU.                                                                                                                                                                                                                                       | Intervention group: mean= 50.87 (SD 17.4)<br>Comparison group: mean= 52.14 (SD 18.6) | Intervention group: male= 38.8%, female= 61.2%<br>Comparison group: male=41.6%, female= 58.4% | No specific groups appear to have been excluded from the study.                                                                                                                                    | Intervention group n=694<br>Comparison group n=723 |
| 8<br>9<br>10<br>11<br>12<br>13<br>14                     | Tayrose, Newman et al. 2013  | NYU hospital for Joint Diseases, New York.<br><br>Recovery room and general orthopaedic ward.                        | 900 consecutive hip and knee arthroplasty patients.                                                                                                                                                                            | Not stated                                                                                                                                                                                                                                                                                                                                 | Intervention group: mean= 63.7<br>Comparison group: mean= 64.3                       | Intervention group: male=125, female=206<br>Comparison group: male= 216, female=353           | Unable to assess, and exclusion criteria are not stated.                                                                                                                                           | Intervention group n=331<br>Comparison group n=569 |
| 15<br>16<br>17<br>18<br>19<br>20<br>21<br>22<br>23<br>24 | Zoremba, Dette et al. 2009   | University of Marburg, Germany.<br><br>PACU within a tertiary teaching hospital.                                     | 60 obese adult patients (BMI 30-40) ASA 2-3, scheduled for minor peripheral surgery. Minimum surgery duration=40min, maximum surgery duration= 120 min.                                                                        | Abdominal surgery, surgery requiring head-down tilt, history of GORD, hiatus hernia, likely difficult intubation, pregnancy, emergency operation, severe renal dysfunction, asthma requiring therapy, cardiac disease associated with dyspnoea (NYHA >2), severe psychiatric disorders or difficulties in cooperating during measurements. | Intervention group: mean 52 years<br>Control group: mean 53 years                    | Not stated                                                                                    | Multimorbid patients with ASA >3 have been excluded (this is stated specifically in the exclusion criteria). All major surgery (including abdominal surgery) has also been intentionally excluded. | Intervention group n=30<br>Control group n=30      |

25  
26  
27  
28  
29  
30  
31  
32  
33  
34  
35  
36  
37  
38  
39  
40  
41  
42  
43  
44  
45  
46

## Interventions additional table:

| <i>Source</i>                    | <i>Intervention name</i>                                                                                           | <i>Aims and rationale</i>                                                                                                                                                                                                                                                               | <i>Methods</i>                                                                                                                                                                                                                                                                                                                                                                                                                                                                                                                                                           | <i>Intervention delivery (staff and location)</i>                                                                                                                                                                                                                                                                                 | <i>Timing of intervention</i>                                                                                                                     | <i>Tailoring of intervention</i>                                                                                                     | <i>Modifications made</i>                                                                                                      | <i>Assessment of fidelity</i>                                                                                                                                                              |
|----------------------------------|--------------------------------------------------------------------------------------------------------------------|-----------------------------------------------------------------------------------------------------------------------------------------------------------------------------------------------------------------------------------------------------------------------------------------|--------------------------------------------------------------------------------------------------------------------------------------------------------------------------------------------------------------------------------------------------------------------------------------------------------------------------------------------------------------------------------------------------------------------------------------------------------------------------------------------------------------------------------------------------------------------------|-----------------------------------------------------------------------------------------------------------------------------------------------------------------------------------------------------------------------------------------------------------------------------------------------------------------------------------|---------------------------------------------------------------------------------------------------------------------------------------------------|--------------------------------------------------------------------------------------------------------------------------------------|--------------------------------------------------------------------------------------------------------------------------------|--------------------------------------------------------------------------------------------------------------------------------------------------------------------------------------------|
| Callaghan, Lynch et al. 2005     | Introduction of OIR (Overnight Intensive Recovery)                                                                 | The majority of vascular surgical patients were routinely admitted to ICU post-operatively. However, several studies have demonstrated that extubation in theatre after AAA repair is safe[1] and that routine admission to ICU after infra-renal aortic surgery is unnecessary [2, 3]. | <p>Surgical patients assessed preoperatively by vascular surgeon and anaesthetist (ECG and full bloods). Patient referred to specialist if further pre-operative assessment is required.</p> <p>OIR located in theatre recovery. Maximum stay 24 hours. No facilities for mechanical ventilation or renal replacement therapy.</p> <p>Patients reviewed in the morning by surgical teams, and discharged to the ward if stable. If ongoing instability, patients transferred to ICU</p> <p>Face to face delivery of intervention</p> <p>No co-interventions apparent</p> | <p>Nurse to patient ratio 1:1</p> <p>Day time medical coverage provided by PACU anaesthetist and vascular surgical teams. Overnight medical care provided by the on-call anaesthetist and general surgical teams.</p> <p>No specific training or upskilling period detailed. Pre-existing medical and nursing skills required</p> | Intervention provided post-operatively for a maximum of 24 hours.                                                                                 | Post-operative medical care tailored to each patient. However, the OIR environment was not changed during the study.                 | OIR does not appear to have been modified or adapted during the study                                                          | No specific mention of steps taken to ensure fidelity in the OIR pathway. Anaesthetic techniques do appear to have been standardised, as well as post-operative analgesia.                 |
| Eichenberger, Haller et al. 2011 | Introduction of a two-track clinical pathway that clearly defined & coordinated medical and nursing interventions. | Post-operative complications have a major impact on survival, especially in the older population [4, 5]. A clinical review of current practices prior to implementation of the pathway showed that poorly defined                                                                       | <p>Fast track pathway: nurse driven, ASA 1-2. At 15min intervals nursing staff evaluate patients' vitals using Aldrete score, and pain is assessed using verbal numeric rating scale.</p> <p>Slow track pathway: physician driven, ASA 3-</p>                                                                                                                                                                                                                                                                                                                            | Fast-track programme: initial post-operative care prescribed by the anaesthetist and provided by the PACU nursing staff. Ongoing care is delivered by the PACU nursing staff only (unless                                                                                                                                         | Fast-track programme: care provided immediately post-operatively. Discharge performed without further communication with the PACU anaesthetist if | Initial post-op treatment plan prescribed by the treating anaesthetist was tailored to the patient and their specific medical needs. | No adaptations appear to have been made to either pathway during the study period. However, this is not specifically discussed | <p>Fast track pathway: methods of ensuring adherence to the pathway not discussed.</p> <p>Slow track pathway: adherence to the clinical pathway was ensured during daily rounds by the</p> |

|                              |                                              |                                                                                                                                                                                                                                                                                                                                |                                                                                                                                                                                                                                                                                                                                                                                                                              |                                                                                                                                                                                                                                                                                                                                            |                                                                                                                                                                                                                                                                           |                                                                        |                                                        |                                                                                                                                                                                    |
|------------------------------|----------------------------------------------|--------------------------------------------------------------------------------------------------------------------------------------------------------------------------------------------------------------------------------------------------------------------------------------------------------------------------------|------------------------------------------------------------------------------------------------------------------------------------------------------------------------------------------------------------------------------------------------------------------------------------------------------------------------------------------------------------------------------------------------------------------------------|--------------------------------------------------------------------------------------------------------------------------------------------------------------------------------------------------------------------------------------------------------------------------------------------------------------------------------------------|---------------------------------------------------------------------------------------------------------------------------------------------------------------------------------------------------------------------------------------------------------------------------|------------------------------------------------------------------------|--------------------------------------------------------|------------------------------------------------------------------------------------------------------------------------------------------------------------------------------------|
|                              |                                              | management and discharge criteria resulted in insecurity of the PACU physicians, nursing staff stress and delayed admission of patients from theatre. Evidence suggests that significant post-operative complications can be detected and successfully treated in well-organised PACUs, resulting in increased survival [6-9]. | 5 who have undergone minor or major surgery, or developed post-op complications. Formal handover to PACU anaesthetist. Standardised investigations and treatment guidelines for early post-operative complications. Intervention delivered face-to-face in PACU. No co-interventions identified                                                                                                                              | there is evidence of a complication).<br><br>Slow-track programme: care provided by the PACU anaesthetist with the help of nursing staff<br><br>Pre-existing skills required: PACU specialist nursing staff (overnight nurse also ICU qualified). No specific training for either nursing staff or medical staff is detailed in the study. | Aldrete score is $\geq 8$ and the verbal numeric rating scale is $\leq 3$<br><br>Slow-track programme: care provided immediately post-operatively. Discharge based on Aldrete score $\geq 8$ and normal blood gas analysis. PACU physician in charge decides on discharge |                                                                        |                                                        | medical head of the PACU, and during weekly quality control, feedback and information meetings.                                                                                    |
| Fraser and Nair 2016         | Opening of an extended recovery unit         | Was felt that some patients admitted to critical care post-operatively only required short term monitoring and optimisation [10]. Unnecessary admissions of patients to critical care increases bed occupancy in the unit, and was contributing to significant numbers of OT cancellations.                                    | Extended Recovery Unit was opened in Oct 2014. Patients booked into the unit in advance. 4-6 hour stay. Standard form was completed by nursing staff for every patient: recording time and place of discharge, complications encountered and medical assistance required. (Recorded how many patients were assessed as safe to return to ward, and how many still required level 2 care)<br><br>Nil co-interventions evident | Anaesthetists provided post-op medical care/ plans in the extended recovery unit. Recovery nursing staff provided care and completed the standard service evaluation form.                                                                                                                                                                 | Patients stayed in the extended recovery unit for 4-6 hours post-op.                                                                                                                                                                                                      | Not tailored                                                           | No                                                     | No mention of steps taken to ensure standardisation of treatment. Standard form provided to nursing staff, but no mention if forms were audited to ensure correct data collection. |
| Kastrup, Seeling et al. 2012 | Introduction of intensivist coverage in PACU | Increasing demand for critical care, which can lead to capacity limitations in the ICU. This causes                                                                                                                                                                                                                            | PACU physician is in charge of allocation of patients to the PACU, ICU and IMCU (intermediate care unit)                                                                                                                                                                                                                                                                                                                     | Staffing of the PACU was changed so that both the nursing and physician staffing are covered by the ICU                                                                                                                                                                                                                                    | Intervention provided immediately post-operatively.                                                                                                                                                                                                                       | Immediate post-operative care tailored to each patient by the treating | No apparent modification to the intervention were made | There is no mention of fidelity assessment. As intervention was a change in staffing                                                                                               |



|                                                                                                                                                          |                                       |                                                                                                                                                                                                             |                                                                                                                                                                                                                                                                                                                                                                                                                                                                                                                                                                                                                                                                                                           |                                                                                                                                                                                                                                      |                                                                                                                                               |                                                                                                                                                                                               |                                                                           |                                                                                                                                                                                                                                                                                                                                                                                              |
|----------------------------------------------------------------------------------------------------------------------------------------------------------|---------------------------------------|-------------------------------------------------------------------------------------------------------------------------------------------------------------------------------------------------------------|-----------------------------------------------------------------------------------------------------------------------------------------------------------------------------------------------------------------------------------------------------------------------------------------------------------------------------------------------------------------------------------------------------------------------------------------------------------------------------------------------------------------------------------------------------------------------------------------------------------------------------------------------------------------------------------------------------------|--------------------------------------------------------------------------------------------------------------------------------------------------------------------------------------------------------------------------------------|-----------------------------------------------------------------------------------------------------------------------------------------------|-----------------------------------------------------------------------------------------------------------------------------------------------------------------------------------------------|---------------------------------------------------------------------------|----------------------------------------------------------------------------------------------------------------------------------------------------------------------------------------------------------------------------------------------------------------------------------------------------------------------------------------------------------------------------------------------|
| 1<br>2<br>3<br>4<br>5<br>6<br>7<br>8<br>9<br>10<br>11<br>12<br>13<br>14<br>15<br>16<br>17                                                                |                                       | delay in admissions of patients from ED, cancellation of surgery [11, 12], early discharge from ICU [11, 13-15], initiation of treatment in ED or on a standard ward and inter-hospital transfers [12, 16]. | in collaboration with the surgeons. If no intensive care bed available, patients can be treated in the PACU for up to 24 hours (independent of the degree of organ failure) There are 6 beds with complete intensive care monitoring and respiratory care possibilities available.<br><br>Face to face delivery of intervention<br><br>No co intervention evident or discussed                                                                                                                                                                                                                                                                                                                            | team. The physician staffing was changed to a 24hr in-house critical care physician and nurse presence for the PACU. 1:3 nurse, patient ratio. 1 physician for all PACU patients.                                                    | Patients can be immediately admitted to the PACU around the clock (without any delays).                                                       | anaesthetist and surgeon.                                                                                                                                                                     | during the study period.                                                  | model, this would have been monitored by the anaesthetist/ICU physician in charge.                                                                                                                                                                                                                                                                                                           |
| 18<br>19<br>20<br>21<br>22<br>23<br>24<br>25<br>26<br>27<br>28<br>29<br>30<br>31<br>32<br>33<br>34<br>35<br>36<br>37<br>38<br>39<br>40<br>41<br>42<br>43 | Schweizer, Khatchatourian et al. 2002 | Opening of a new PACU (post-anaesthesia care unit)                                                                                                                                                          | Utilisation of the ICU for routine post-op care is commonplace, however ICUs account for an increasing proportion of a hospitals budget [17-19].<br><br>PACU moved to an area closer to theatres and the ICU, and was expended with additional beds to provide overnight care following major, non-cardiac surgery.<br><br>Standardised rounding (morning and evening), with review of patient's clinical status, laboratory results and chest radiographs.<br><br>Co-interventions: Preoperative risk assessment guidelines of the American Heart association and the American College of Cardiology (AHA/ACC) were introduced, and antiadrenergic medications (beta-blockers and alpha-2-agonists) were | New PACU staffed with anaesthesia-trained nurses (1:3 ratio), post-operative care coordinated by cardiothoracic surgical and anaesthesia teams, 24-hour medical coverage provided by one PACU resident (supervised by an attending). | New PACU provided 24-hour medical coverage. Patients were admitted immediately post-operatively. (Time limit on PACU admission not specified) | Post-operative care standardised as much as possible, but ongoing care tailored to each patient based on pre-existing medical comorbidities, intra-operative events and post-op complications | Intervention does not appear to have been altered during the study period | Variations in medical practice were minimised using standard protocols for blood test analysis, CXR orders, antibiotic prophylaxis, pain control, fluid administration, respiratory therapy, nutrition and mobilisation.<br><br>All surgical procedures and approach standardised as much as possible. General anaesthesia standardised. Post-operative analgesia regimen also standardised. |

|                              |                                                       |                                                                                                                                                                                                                                                                                                                                                                                                                   |                                                                                                                                                                                                                                                                                                                                                                                                                                                                                                                                                                                                                                                                                                                                                                                                              |                                                                                                                                                                                                                                                                                                                                                                                     |                                                                                                                                                                                                                                                                                                                                                                                 |                                                     |                                                                                   |                                                                                                                                                                                                                                                                           |
|------------------------------|-------------------------------------------------------|-------------------------------------------------------------------------------------------------------------------------------------------------------------------------------------------------------------------------------------------------------------------------------------------------------------------------------------------------------------------------------------------------------------------|--------------------------------------------------------------------------------------------------------------------------------------------------------------------------------------------------------------------------------------------------------------------------------------------------------------------------------------------------------------------------------------------------------------------------------------------------------------------------------------------------------------------------------------------------------------------------------------------------------------------------------------------------------------------------------------------------------------------------------------------------------------------------------------------------------------|-------------------------------------------------------------------------------------------------------------------------------------------------------------------------------------------------------------------------------------------------------------------------------------------------------------------------------------------------------------------------------------|---------------------------------------------------------------------------------------------------------------------------------------------------------------------------------------------------------------------------------------------------------------------------------------------------------------------------------------------------------------------------------|-----------------------------------------------------|-----------------------------------------------------------------------------------|---------------------------------------------------------------------------------------------------------------------------------------------------------------------------------------------------------------------------------------------------------------------------|
|                              |                                                       |                                                                                                                                                                                                                                                                                                                                                                                                                   | increasingly administered peri operatively                                                                                                                                                                                                                                                                                                                                                                                                                                                                                                                                                                                                                                                                                                                                                                   |                                                                                                                                                                                                                                                                                                                                                                                     |                                                                                                                                                                                                                                                                                                                                                                                 |                                                     |                                                                                   |                                                                                                                                                                                                                                                                           |
| Street, Phillips et al. 2017 | Implementation of a Post Anaesthesia Care Tool (PACT) | Current post-operative death rate of 0.4-4%, and major complication rate of 3-17%. 40% of in-hospital complications are associated with surgery [20, 21]. Hospital costs for surgical patients experiencing a complication are significantly higher than for patients without complications [22-24]. Intensive observation of patients in PACU by nurses can help with the early detection of complications [25]. | <p>Implementation of the tool was supported by peri-operative nursing educators. Materials included posters summarising how to complete the PACT, and feedback sessions between the nurses using the tool and the perioperative team. PACT was included in the revised 'Post-anaesthetics care record'</p> <p>Working party was established to develop the tool. Extensive review of the current processes at each of the hospitals was done. Researchers conducted a systematic review and an expert consensus statement to evaluate the current evidence. PACT tool developed in line with the National Consensus Statement on the essential elements for recognising and responding to clinical deterioration.</p> <p>Face to face delivery of the intervention.</p> <p>No co-interventions apparent.</p> | <p>Perioperative nurse educators trained recovery nurses in the use of the tool. Feedback sessions during the training period were attended by the perioperative team including, educators, nurse unit managers and the quality unit of the organisation. Recovery nursing staff used the PACT in recovery. Medical staff responded to concerns that were triggered by the PACT</p> | <p>PACT used immediately post-operatively, until patient was safe for discharge to the ward (of home for day surgery patients).</p> <p>Patient readiness for discharge from PACU was recorded by a checklist of criteria: last 2 sets of observations were not within the MET criteria, no active vomiting, pain management ordered and all surgical concerns had been met.</p> | <p>Intervention does not appear to be tailored.</p> | <p>No modifications appear to have been made once the study period commenced.</p> | <p>Feedback sessions during the training period were attended by the perioperative team including, educators, nurse unit managers and the quality unit of the organisation. However, there is no mention of fidelity assessment or auditing once the tool was in use.</p> |
| Tayrose, Newman et al. 2013  | Rapid rehab patients started as part of a pilot       | Previous studies have shown that early mobilisation after                                                                                                                                                                                                                                                                                                                                                         | Therapy program was the same for each group: therapist would                                                                                                                                                                                                                                                                                                                                                                                                                                                                                                                                                                                                                                                                                                                                                 | Physiotherapists delivered the intervention                                                                                                                                                                                                                                                                                                                                         | Therapy commenced in the                                                                                                                                                                                                                                                                                                                                                        | Intervention was tailored to the speed of recovery  | No adaptations or modifications appear to have                                    | No assessment of fidelity reported. Unclear how the                                                                                                                                                                                                                       |

1  
2  
3  
4  
5  
6  
7  
8  
9  
10  
11  
12  
13  
14  
15  
16  
17  
18  
19  
20  
21  
22  
23  
24  
25  
26  
27  
28  
29  
30  
31  
32  
33  
34  
35  
36  
37  
38  
39  
40  
41  
42  
43  
44  
45  
46

|                                   |                                                                                        |                                                                                                                                                                                                                                                                                                                                                                                                             |                                                                                                                                                                                                                                                                                                                                                                                                                                                          |                                                                                                                                                                                                                                                          |                                                                                                                   |                                                                                                                                                                                                                        |                                                   |                                                                                                                                                                                                                                                                                                                                                                |
|-----------------------------------|----------------------------------------------------------------------------------------|-------------------------------------------------------------------------------------------------------------------------------------------------------------------------------------------------------------------------------------------------------------------------------------------------------------------------------------------------------------------------------------------------------------|----------------------------------------------------------------------------------------------------------------------------------------------------------------------------------------------------------------------------------------------------------------------------------------------------------------------------------------------------------------------------------------------------------------------------------------------------------|----------------------------------------------------------------------------------------------------------------------------------------------------------------------------------------------------------------------------------------------------------|-------------------------------------------------------------------------------------------------------------------|------------------------------------------------------------------------------------------------------------------------------------------------------------------------------------------------------------------------|---------------------------------------------------|----------------------------------------------------------------------------------------------------------------------------------------------------------------------------------------------------------------------------------------------------------------------------------------------------------------------------------------------------------------|
|                                   | <p>program where the first 2 cases of the day were mobilised in the recovery room.</p> | <p>total joint replacement enhances post-op recovery and promotes faster rehabilitation [26, 27]. Previous studies have also demonstrated early mobilisation leads to a decreased LOS, improve patient outcomes, and demonstrate cost savings [28-30]. However, it's unclear if early mobilisation that starts in the recovery room will lead to a reduction in LOS while maintaining patient outcomes.</p> | <p>start with having patients hang their legs over the side of the bed. Therapy would then progress with transferring to a chair, ambulation, and climbing stairs. The expectation for a patient was to ambulate 100 feet or greater, and climb 6 stairs, prior to discharge.</p> <p>Face to face delivery of intervention by physiotherapists</p> <p>No co-interventions described</p>                                                                  | <p>Standard rehabilitation program implemented. Reliance of physiotherapists pre-existing skills and training.</p>                                                                                                                                       | <p>recovery room on the day of surgery</p>                                                                        | <p>of each patient. If a patient was unfit to mobilise on the day of surgery in PACU (as per the anaesthetist, surgeon or ICU doctor), they were not mobilised despite being one of the first 2 cases for the day.</p> | <p>occurred during the study.</p>                 | <p>standardisation of the rehabilitation program was ensured.</p>                                                                                                                                                                                                                                                                                              |
| <p>Zoremba, Dette et al. 2009</p> | <p>Patients performed incentive spirometry in the PACU</p>                             | <p>Even several days after surgery, obese patients exhibit a measurable amount of atelectasis, predisposing them to post-op pulmonary complications [31-35].</p>                                                                                                                                                                                                                                            | <p>Physiotherapist supervised the respiratory physiotherapy treatment at all times. Exercises were started approximately 15 minutes after extubation, and the patients were encouraged to perform 15 deep breaths (incentive spirometry) every 10-15 minutes within the first 2 hours after surgery. If needed, patients were asked to cough during the pause to mobilise secretions. All therapy was performed in the sitting position if possible.</p> | <p>Physiotherapists supervised the respiratory physiotherapy treatment at all times</p> <p>Pre-existing skills required to deliver the intervention. No mention of specific training provided to the physiotherapists apart from the study protocol.</p> | <p>Intervention was delivered commencing 15 minutes post-operatively, continuing until 2 hours after surgery.</p> | <p>Intervention does not appear to have been tailored</p>                                                                                                                                                              | <p>No change to intervention during the study</p> | <p>Spirometry was standardised as much as possible. At each assessment time, spirometry was performed at least 3 times, and the best measurement was recorded (in line with the criteria of the European Respiratory Society). Factors that interfered with breathing (eg pain, shivering) were eliminated, or minimised to produce reliable measurements)</p> |

1  
2  
3  
4  
5  
6  
7  
8  
9  
10  
11  
12  
13  
14  
15  
16  
17  
18  
19  
20  
21  
22  
23  
24  
25  
26  
27  
28  
29  
30  
31  
32  
33  
34  
35  
36  
37  
38  
39  
40  
41  
42  
43  
44  
45  
46

No co-interventions described

#### Outcomes and comparison groups additional table:

| Source                           | Primary outcomes                                             | Method of assessing primary outcome measure                                                                                                                                                                                                                        | Timing of primary outcome assessment                                                                              | Adverse events                                         | Secondary outcomes                                              | Method of assessing secondary outcome measure                                                                                       | Timing of secondary outcome measure                     |
|----------------------------------|--------------------------------------------------------------|--------------------------------------------------------------------------------------------------------------------------------------------------------------------------------------------------------------------------------------------------------------------|-------------------------------------------------------------------------------------------------------------------|--------------------------------------------------------|-----------------------------------------------------------------|-------------------------------------------------------------------------------------------------------------------------------------|---------------------------------------------------------|
| Callaghan, Lynch et al. 2005     | In hospital mortality                                        | Patients who had surgery were identified using a combination of computerized theatre records, surgeon's logbooks, and theatre booking diaries. Case notes analysed retrospectively. POSSUM variables collected prospectively (during the pre-operative assessment) | Retrospective analysis<br>No follow-up required                                                                   | OIR group: Admission to ICU within 48 hours of surgery | Operative characteristics. Common post-operative complications. | Case notes analysed retrospectively. Only complications occurring on more than four occasions during the study period are included. | Retrospective analysis of notes. No follow-up required. |
|                                  | In hospital morbidity                                        |                                                                                                                                                                                                                                                                    |                                                                                                                   |                                                        |                                                                 |                                                                                                                                     |                                                         |
|                                  | Mean postoperative stay, days                                |                                                                                                                                                                                                                                                                    |                                                                                                                   |                                                        |                                                                 |                                                                                                                                     |                                                         |
|                                  | Median POSSUM operative severity score                       |                                                                                                                                                                                                                                                                    |                                                                                                                   |                                                        |                                                                 |                                                                                                                                     |                                                         |
| Eichenberger, Haller et al. 2011 | PACU length of stay                                          | Anaesthetic Information system (computerize patient information system. PACU data entered by PACU nurses and PACU secretary)                                                                                                                                       | Data entered in real time in PACU. Data reviewed retrospectively by investigators.                                | Nil reported                                           | Nil reported                                                    | NA                                                                                                                                  | NA                                                      |
|                                  | In-hospital mortality                                        | The hospital administrative database (administrative information used for financial purposes). Cause of death extracted from patient discharge reports, and entered into the administrative database by professional coders.                                       | Data entered throughout the post-operative period until discharge. Data reviewed retrospectively by investigators |                                                        |                                                                 |                                                                                                                                     |                                                         |
|                                  | Unplanned ICU admissions after PACU stay                     | The hospital administrative database. Reason for unplanned ICU admission extracted from patient discharge report and entered into database by professional coders.                                                                                                 | Data entered throughout the post-operative period. Reason for ICU admission entered after patient discharge.      |                                                        |                                                                 |                                                                                                                                     |                                                         |
| Fraser and Nair 2016             | Discharge destination after extended recovery unit admission | Standard form completed by nursing staff in extended recovery, documenting time and place of discharge, complications encountered and medical assistance required.                                                                                                 | Assessment made at time of extended recovery discharge. No follow-up done.                                        | Nil reported                                           | Nil reported                                                    | NA                                                                                                                                  | NA                                                      |

|                                                                                                                                                                                                                                              |                                                                                                                                                                                                                                                                                                                                                                                                                                                                   |                                                                                                                                                                                                                                                                                                                                                                                                                                                                                                                                                                                                                                                  |                                                                                                                                                |                     |                                                                                                                                                                                                                                                                                                                        |                                                                                                                                                                                                                                                                                                                  |                                                                                                                                   |
|----------------------------------------------------------------------------------------------------------------------------------------------------------------------------------------------------------------------------------------------|-------------------------------------------------------------------------------------------------------------------------------------------------------------------------------------------------------------------------------------------------------------------------------------------------------------------------------------------------------------------------------------------------------------------------------------------------------------------|--------------------------------------------------------------------------------------------------------------------------------------------------------------------------------------------------------------------------------------------------------------------------------------------------------------------------------------------------------------------------------------------------------------------------------------------------------------------------------------------------------------------------------------------------------------------------------------------------------------------------------------------------|------------------------------------------------------------------------------------------------------------------------------------------------|---------------------|------------------------------------------------------------------------------------------------------------------------------------------------------------------------------------------------------------------------------------------------------------------------------------------------------------------------|------------------------------------------------------------------------------------------------------------------------------------------------------------------------------------------------------------------------------------------------------------------------------------------------------------------|-----------------------------------------------------------------------------------------------------------------------------------|
| <p>1<br/>2<br/>3<br/>4<br/>5<br/>6<br/>7<br/>8<br/>9<br/>10<br/>11<br/>12<br/>13<br/>14<br/>15</p> <p>Kastrup, Seeling et al. 2012</p>                                                                                                       | <p>LOS in PACU (days)</p> <p>LOS in ICU (all types of ICU's)(days)</p> <p>Pre operative days (all patients)</p> <p>Pre operative day (PACU-patients)</p> <p>Pre operative day (ICU-patients)</p> <p>Days on normal ward</p> <p>LOS hospital (days)</p> <p>CMI (case mix index) normal ward</p> <p>CM ICU</p> <p>CW (cost weight) per hospital stay (overall)</p>                                                                                                  | <p>Data collected from the hospital administration system. All clinically relevant data are documented in a patient data management system (PDMS) and can be extracted for evaluations. Every patient admitted to the ICU in included in the system (COPRA-System® GmbH, Sasbachwalden, Germany). 24-hours after patient discharge, the record is changed to a read-only version so that no modifications can be made.</p>                                                                                                                                                                                                                       | <p>Retrospective analysis of data. Data continuously collected until patient discharge. No follow-up post-discharge.</p>                       | <p>Nil reported</p> | <p>General descriptive variables for the ICU, before and after the introduction of the PACU (ICU patients only).</p>                                                                                                                                                                                                   | <p>Data extracted from patient data management system (PDMS). DRG system allows for coding of the intensive care as DRG procedure, making the severity of disease relevant for reimbursement. The “Complex intensive care treatment” is based on several scores, which are collected within the PDMS system.</p> | <p>Retrospective analysis of data. Data continuously collected until patient discharge. No follow-up post-discharge.</p>          |
| <p>16<br/>17<br/>18<br/>19<br/>20<br/>21<br/>22<br/>23<br/>24<br/>25<br/>26<br/>27<br/>28<br/>29<br/>30<br/>31<br/>32<br/>33<br/>34<br/>35<br/>36<br/>37<br/>38<br/>39<br/>40<br/>41<br/>42</p> <p>Schweizer, Khatchatourian et al. 2002</p> | <p>Mortality</p> <p>Re-operation</p> <p>Secondary admission to ICU (either from PACU or from the ward)</p> <p>Cardiac complications</p> <ul style="list-style-type: none"> <li>• Myocardial infarct</li> <li>• Arrhythmias</li> <li>• Pulmonary oedema</li> </ul> <p>Respiratory complications</p> <ul style="list-style-type: none"> <li>• Atelectasis</li> <li>• Bronchopneumonia</li> </ul> <p>Mechanical ventilation &gt;6 hours</p> <p>Renal dysfunction</p> | <p>Data prospectively collected on standardized worksheets describing the pre-operative, intraoperative and postoperative periods. One investigator also reviewed all nursing charts, medical records and hospital discharge letters.</p> <p>Data abstracted from two institutional databases</p> <p>Data obtained from the hospital computer</p> <p>Data were prospectively collected on standardized worksheets describing the pre-operative, intraoperative and postoperative periods. One investigator also reviewed all nursing charts, medical records and hospital discharge letters.</p> <p>As above</p> <p>As above</p> <p>As above</p> | <p>Outcome assessments done during inpatient stay, and on review of the hospital data base. No follow-up required after hospital discharge</p> | <p>Nil reported</p> | <p>Identification of independent risk factors for mortality and major complications following thoracic surgery</p> <p>Identification of independent risk factors for mortality and major complications following major vascular surgery</p> <p>Evaluation of perioperative antiadrenergic treatment administration</p> | <p>Data abstracted from two institutional databases</p>                                                                                                                                                                                                                                                          | <p>Patient risk factors reported pre-operatively and intraoperatively (prospective data collection). Analysed at a later date</p> |

|                              |                                                           |                                                                                                                                                                                                                                                                                                                                                                                                                                                                          |                                                                                        |              |                                                           |                                                                                                                                                                                                                                                                                                                                                                                                                                                       |                                                                                      |
|------------------------------|-----------------------------------------------------------|--------------------------------------------------------------------------------------------------------------------------------------------------------------------------------------------------------------------------------------------------------------------------------------------------------------------------------------------------------------------------------------------------------------------------------------------------------------------------|----------------------------------------------------------------------------------------|--------------|-----------------------------------------------------------|-------------------------------------------------------------------------------------------------------------------------------------------------------------------------------------------------------------------------------------------------------------------------------------------------------------------------------------------------------------------------------------------------------------------------------------------------------|--------------------------------------------------------------------------------------|
|                              | Hospital length of stay                                   | Data obtained from the hospital computer                                                                                                                                                                                                                                                                                                                                                                                                                                 |                                                                                        |              |                                                           |                                                                                                                                                                                                                                                                                                                                                                                                                                                       |                                                                                      |
| Street, Phillips et al. 2017 | Nursing management of patient symptoms                    | Data collected by research nurses from the medical record following patient discharge. Severity of each adverse event was graded using the Common Terminology Criteria for Adverse Events (V.4.03) and grouped into mild (no or minimal effect to the patient and resolved spontaneously), moderate (event with resolved after intervention, with no lasting effect for the patient) and severe (required intervention and caused harm to the patient, including death). | Data reviewed from case notes on patient discharge. No longer term follow-up required. | Nil reported | Health service usage and healthcare costs                 | Economic evaluation done from organization data that were routinely submitted to the regional health department for benchmarking. Healthcare costs for each patient admitted to hospital are calculated on a cost-weight analysis using the Australian Refined Diagnostic-Related Groups (AR-DRGs). The AR-DRG was used to calculate the costs for all initial admissions and unplanned readmission, using the nations efficient price determination. | Data reviewed from case notes on patient discharge. No long term follow-up required. |
|                              | Rates of adverse events                                   |                                                                                                                                                                                                                                                                                                                                                                                                                                                                          |                                                                                        |              |                                                           |                                                                                                                                                                                                                                                                                                                                                                                                                                                       |                                                                                      |
|                              | Mortality                                                 |                                                                                                                                                                                                                                                                                                                                                                                                                                                                          |                                                                                        |              |                                                           |                                                                                                                                                                                                                                                                                                                                                                                                                                                       |                                                                                      |
|                              | Length of stay in PACU                                    |                                                                                                                                                                                                                                                                                                                                                                                                                                                                          |                                                                                        |              |                                                           |                                                                                                                                                                                                                                                                                                                                                                                                                                                       |                                                                                      |
|                              | Length of hospital admission                              |                                                                                                                                                                                                                                                                                                                                                                                                                                                                          |                                                                                        |              |                                                           |                                                                                                                                                                                                                                                                                                                                                                                                                                                       |                                                                                      |
|                              | Discharge destination                                     |                                                                                                                                                                                                                                                                                                                                                                                                                                                                          |                                                                                        |              |                                                           |                                                                                                                                                                                                                                                                                                                                                                                                                                                       |                                                                                      |
| Tayrose, Newman et al. 2013  | Overall hospital length of stay                           | Retrospective review of cases, however it is not stated how this was done (case note reviews versus use of the hospital's database)                                                                                                                                                                                                                                                                                                                                      | At time of discharge                                                                   | Nil reported | Percentage completion of the rapid rehabilitation program | Progression of rehab was followed, however methods for assessing this were not stated.                                                                                                                                                                                                                                                                                                                                                                | Followed as an inpatient until the time of discharge.                                |
|                              | Hip arthroplasty subgroup length of stay                  |                                                                                                                                                                                                                                                                                                                                                                                                                                                                          |                                                                                        |              |                                                           |                                                                                                                                                                                                                                                                                                                                                                                                                                                       |                                                                                      |
|                              | Knee arthroplasty subgroup length of stay                 |                                                                                                                                                                                                                                                                                                                                                                                                                                                                          |                                                                                        |              |                                                           |                                                                                                                                                                                                                                                                                                                                                                                                                                                       |                                                                                      |
| Zoremba, Dette et al. 2009   | Pulse oximetry at 1hr, 2hr, 6hr and 24hr post-operatively | Assessed face to face by an investigator. The investigators were blinded.                                                                                                                                                                                                                                                                                                                                                                                                | At 1hr, 2hr, 6hr and 24hr respectively                                                 | Nil reported | Nil reported                                              | NA                                                                                                                                                                                                                                                                                                                                                                                                                                                    | NA                                                                                   |
|                              | Spirometry at 1hr, 2hr, 6hr and 24hr post-operatively     |                                                                                                                                                                                                                                                                                                                                                                                                                                                                          |                                                                                        |              |                                                           |                                                                                                                                                                                                                                                                                                                                                                                                                                                       |                                                                                      |

- Cohen, J., et al., *The Safety of Immediate Extubation After Abdominal Aortic Surgery: A Prospective, Randomised Control Trial*. *Anaesth Analg*, 2001. **93**: p. 1546-1549.
- Bertges, D., et al., *Is Routine Use of the Intensive Care Unit After Elective Infrarenal Aortic Aneurysm Repair Necessary?* *J Vasc Surg*, 2000(32): p. 634-642.
- Podore, P.C. and E.B. Throop, *Infrarenal aortic surgery with a 3-day hospital stay: A report on success with a clinical pathway*. *J Vasc Surg*, 1999. **29**(5): p. 787-92.
- Khuri, S.F., et al., *Determinants of long-term survival after major surgery and the adverse effect of postoperative complications*. *Ann Surg*, 2005. **242**(3): p. 326-41; discussion 341-3.
- Manku, K. and J.M. Leung, *Prognostic significance of postoperative in-hospital complications in elderly patients. II. Long-term quality of life*. *Anesth Analg*, 2003. **96**(2): p. 590-4, table of contents.
- Brown, I., et al., *Use of postanesthesia discharge criteria to reduce discharge delays for inpatients in the postanesthesia care unit*. *J Clin Anesth*, 2008. **20**(3): p. 175-9.
- Thompson, J.S., et al., *Temporal patterns of postoperative complications*. *Arch Surg*, 2003. **138**(6): p. 596-602; discussion 602-3.
- Vlayen, A., et al., *Incidence and preventability of adverse events requiring intensive care admission: a systematic review*. *J Eval Clin Pract*, 2012. **18**(2): p. 485-97.
- Weissman, C. and N. Klein, *The importance of differentiating between elective and emergency postoperative critical care patients*. *J Crit Care*, 2008. **23**(3): p. 308-16.
- Montpellier, D., E. Hayek, and M. Ossart, *[Objectives of consultation in anesthesia]*. *Phlebologie*, 1989. **42**(1): p. 7-18; discussion 18-20.

- 1 11. Chalfin, D.B., et al., *Impact of delayed transfer of critically ill patients from the emergency department to the intensive care unit*. Crit Care Med, 2007. **35**(6): p. 1477-83.
- 2 12. Duke, G.J., *Metropolitan audit of appropriate referrals refused admission to intensive care*. Anaesth Intensive Care, 2004. **32**(5): p. 702-6.
- 3 13. Campbell, A.J., et al., *Predicting death and readmission after intensive care discharge*. Br J Anaesth, 2008. **100**(5): p. 656-62.
- 4 14. Hanane, T., et al., *The association between nighttime transfer from the intensive care unit and patient outcome*. Crit Care Med, 2008. **36**(8): p. 2232-7.
- 5 15. Priestap, F.A. and C.M. Martin, *Impact of intensive care unit discharge time on patient outcome*. Crit Care Med, 2006. **34**(12): p. 2946-51.
- 6 16. Duke, G.J., et al., *Interventions to circumvent intensive care access block: a retrospective 2-year study across metropolitan Melbourne*. Med J Aust, 2009. **190**(7): p. 375-8.
- 7 17. Hanson, C.W., 3rd, et al., *Effects of an organized critical care service on outcomes and resource utilization: a cohort study*. Crit Care Med, 1999. **27**(2): p. 270-4.
- 8 18. Pollack, M.M., et al., *Improving the outcome and efficiency of intensive care: the impact of an intensivist*. Crit Care Med, 1988. **16**(1): p. 11-7.
- 9 19. Singer, M., et al., *The cost of intensive care: a comparison on one unit between 1988 and 1991*. Intensive Care Med, 1994. **20**(8): p. 542-9.
- 10 20. Brennan, T.A., et al., *Incidence of adverse events and negligence in hospitalized patients: results of the Harvard Medical Practice Study I. 1991*. Qual Saf Health Care, 2004. **13**(2): p. 145-51; discussion 151-2.
- 11 21. Weiser, T.G., et al., *An estimation of the global volume of surgery: a modelling strategy based on available data*. Lancet, 2008. **372**(9633): p. 139-44.
- 12 22. Birkmeyer, J.D., et al., *Hospital quality and the cost of inpatient surgery in the United States*. Ann Surg, 2012. **255**(1): p. 1-5.
- 13 23. de Vries, E.N., et al., *The incidence and nature of in-hospital adverse events: a systematic review*. Qual Saf Health Care, 2008. **17**(3): p. 216-23.
- 14 24. Khan, N.A., et al., *Association of postoperative complications with hospital costs and length of stay in a tertiary care center*. J Gen Intern Med, 2006. **21**(2): p. 177-80.
- 15 25. Prowse, M.A. and P.A. Lyne, *Clinical effectiveness in the post-anaesthesia care unit: how nursing knowledge contributes to achieving intended patient outcomes*. J Adv Nurs, 2000. **31**(5): p. 1115-24.
- 16 26. Khan, F., et al., *Multidisciplinary rehabilitation programmes following joint replacement at the hip and knee in chronic arthropathy*. Cochrane Database Syst Rev, 2008(2): p. Cd004957.
- 17 27. Renkawitz, T., et al., *Comparison of two accelerated clinical pathways--after total knee replacement how fast can we really go?* Clin Rehabil, 2010. **24**(3): p. 230-9.
- 18 28. Husted, H., et al., *What determines length of stay after total hip and knee arthroplasty? A nationwide study in Denmark*. Arch Orthop Trauma Surg, 2010. **130**(2): p. 263-8.
- 19 29. Minns Lowe, C.J., et al., *Effectiveness of physiotherapy exercise following hip arthroplasty for osteoarthritis: a systematic review of clinical trials*. BMC Musculoskelet Disord, 2009. **10**: p. 98.
- 20 30. Schneider, M., et al., *Predictive factors influencing fast track rehabilitation following primary total hip and knee arthroplasty*. Arch Orthop Trauma Surg, 2009. **129**(12): p. 1585-91.
- 21 31. Brismar, B., et al., *Pulmonary densities during anesthesia with muscular relaxation--a proposal of atelectasis*. Anesthesiology, 1985. **62**(4): p. 422-8.
- 22 32. Hedenstierna, G., *Alveolar collapse and closure of airways: regular effects of anaesthesia*. Clin Physiol Funct Imaging, 2003. **23**(3): p. 123-9.
- 23 33. Pelosi, P., et al., *Respiratory system mechanics in sedated, paralyzed, morbidly obese patients*. J Appl Physiol (1985), 1997. **82**(3): p. 811-8.
- 24 34. Rothen, H.U., et al., *Airway closure, atelectasis and gas exchange during general anaesthesia*. Br J Anaesth, 1998. **81**(5): p. 681-6.
- 25 35. Tokics, L., et al., *Lung collapse and gas exchange during general anesthesia: effects of spontaneous breathing, muscle paralysis, and positive end-expiratory pressure*. Anesthesiology, 1987. **66**(2): p. 157-67.





# PRISMA 2009 Checklist

| Section/topic                      | #  | Checklist item                                                                                                                                                                                                                                                                                              | Reported on page # |
|------------------------------------|----|-------------------------------------------------------------------------------------------------------------------------------------------------------------------------------------------------------------------------------------------------------------------------------------------------------------|--------------------|
| <b>TITLE</b>                       |    |                                                                                                                                                                                                                                                                                                             |                    |
| Title                              | 1  | Identify the report as a systematic review, meta-analysis, or both.                                                                                                                                                                                                                                         | 1                  |
| <b>ABSTRACT</b>                    |    |                                                                                                                                                                                                                                                                                                             |                    |
| Structured summary                 | 2  | Provide a structured summary including, as applicable: background; objectives; data sources; study eligibility criteria, participants, and interventions; study appraisal and synthesis methods; results; limitations; conclusions and implications of key findings; systematic review registration number. | 2                  |
| <b>INTRODUCTION</b>                |    |                                                                                                                                                                                                                                                                                                             |                    |
| Rationale                          | 3  | Describe the rationale for the review in the context of what is already known.                                                                                                                                                                                                                              | 3                  |
| Objectives                         | 4  | Provide an explicit statement of questions being addressed with reference to participants, interventions, comparisons, outcomes, and study design (PICOS).                                                                                                                                                  | 4                  |
| <b>METHODS</b>                     |    |                                                                                                                                                                                                                                                                                                             |                    |
| Protocol and registration          | 5  | Indicate if a review protocol exists, if and where it can be accessed (e.g., Web address), and, if available, provide registration information including registration number.                                                                                                                               | 4                  |
| Eligibility criteria               | 6  | Specify study characteristics (e.g., PICOS, length of follow-up) and report characteristics (e.g., years considered, language, publication status) used as criteria for eligibility, giving rationale.                                                                                                      | 4                  |
| Information sources                | 7  | Describe all information sources (e.g., databases with dates of coverage, contact with study authors to identify additional studies) in the search and date last searched.                                                                                                                                  | 4                  |
| Search                             | 8  | Present full electronic search strategy for at least one database, including any limits used, such that it could be repeated.                                                                                                                                                                               | 16                 |
| Study selection                    | 9  | State the process for selecting studies (i.e., screening, eligibility, included in systematic review, and, if applicable, included in the meta-analysis).                                                                                                                                                   | 5                  |
| Data collection process            | 10 | Describe method of data extraction from reports (e.g., piloted forms, independently, in duplicate) and any processes for obtaining and confirming data from investigators.                                                                                                                                  | 5                  |
| Data items                         | 11 | List and define all variables for which data were sought (e.g., PICOS, funding sources) and any assumptions and simplifications made.                                                                                                                                                                       | 5                  |
| Risk of bias in individual studies | 12 | Describe methods used for assessing risk of bias of individual studies (including specification of whether this was done at the study or outcome level), and how this information is to be used in any data synthesis.                                                                                      | 5                  |
| Summary measures                   | 13 | State the principal summary measures (e.g., risk ratio, difference in means).                                                                                                                                                                                                                               | 5                  |
| Synthesis of results               | 14 | Describe the methods of handling data and combining results of studies, if done, including measures of consistency (e.g., $I^2$ ) for each meta-analysis.                                                                                                                                                   | NA                 |





# PRISMA 2009 Checklist

| Section/topic                 | #  | Checklist item                                                                                                                                                                                           | Reported on page # |
|-------------------------------|----|----------------------------------------------------------------------------------------------------------------------------------------------------------------------------------------------------------|--------------------|
| Risk of bias across studies   | 15 | Specify any assessment of risk of bias that may affect the cumulative evidence (e.g., publication bias, selective reporting within studies).                                                             | 6                  |
| Additional analyses           | 16 | Describe methods of additional analyses (e.g., sensitivity or subgroup analyses, meta-regression), if done, indicating which were pre-specified.                                                         | NA                 |
| <b>RESULTS</b>                |    |                                                                                                                                                                                                          |                    |
| Study selection               | 17 | Give numbers of studies screened, assessed for eligibility, and included in the review, with reasons for exclusions at each stage, ideally with a flow diagram.                                          | 6                  |
| Study characteristics         | 18 | For each study, present characteristics for which data were extracted (e.g., study size, PICOS, follow-up period) and provide the citations.                                                             | 7                  |
| Risk of bias within studies   | 19 | Present data on risk of bias of each study and, if available, any outcome level assessment (see item 12).                                                                                                | 9-11               |
| Results of individual studies | 20 | For all outcomes considered (benefits or harms), present, for each study: (a) simple summary data for each intervention group (b) effect estimates and confidence intervals, ideally with a forest plot. | 11-12              |
| Synthesis of results          | 21 | Present results of each meta-analysis done, including confidence intervals and measures of consistency.                                                                                                  | 13                 |
| Risk of bias across studies   | 22 | Present results of any assessment of risk of bias across studies (see Item 15).                                                                                                                          | 13                 |
| Additional analysis           | 23 | Give results of additional analyses, if done (e.g., sensitivity or subgroup analyses, meta-regression [see Item 16]).                                                                                    | NA                 |
| <b>DISCUSSION</b>             |    |                                                                                                                                                                                                          |                    |
| Summary of evidence           | 24 | Summarize the main findings including the strength of evidence for each main outcome; consider their relevance to key groups (e.g., healthcare providers, users, and policy makers).                     | 13                 |
| Limitations                   | 25 | Discuss limitations at study and outcome level (e.g., risk of bias), and at review-level (e.g., incomplete retrieval of identified research, reporting bias).                                            | 14                 |
| Conclusions                   | 26 | Provide a general interpretation of the results in the context of other evidence, and implications for future research.                                                                                  | 14                 |
| <b>FUNDING</b>                |    |                                                                                                                                                                                                          |                    |
| Funding                       | 27 | Describe sources of funding for the systematic review and other support (e.g., supply of data); role of funders for the systematic review.                                                               | 15                 |

From: Moher D, Liberati A, Tetzlaff J, Altman DG, The PRISMA Group (2009). Preferred Reporting Items for Systematic Reviews and Meta-Analyses: The PRISMA Statement. PLoS Med 6(7): e1000097. doi:10.1371/journal.pmed1000097

For more information, visit: [www.prisma-statement.org](http://www.prisma-statement.org).
