# Supplementary material for: ‘Organisation of delivery of care in operating suite recovery rooms within 48 hours postoperatively and patient outcomes after adult non-cardiac surgery: a systematic review’
Source: PubMed Central journal article supplement — BMJ Open. 2020 Mar 4;10(3):e027262. doi: 10.1136/bmjopen-2018-027262 (PMC7059488; doi:10.1136/bmjopen-2018-027262), 2020-03-04
Supplement: bmjopen-2018-027262supp001.pdf [file bmjopen-2018-027262supp001.pdf]

**Appendix 1.***PubMed Electronic Search Strategy*

| Postoperative period                                                                                                                                                                                                                                                                                                                                                                                                                                                                           | Adults                                                                                                                                                                      | Recovery room                                                                                                                                                                                                                                                                                                     | Patient outcomes                                                                                                                                                                                                                                                                                                                                                                                                                                                                                                                                                                            |
|------------------------------------------------------------------------------------------------------------------------------------------------------------------------------------------------------------------------------------------------------------------------------------------------------------------------------------------------------------------------------------------------------------------------------------------------------------------------------------------------|-----------------------------------------------------------------------------------------------------------------------------------------------------------------------------|-------------------------------------------------------------------------------------------------------------------------------------------------------------------------------------------------------------------------------------------------------------------------------------------------------------------|---------------------------------------------------------------------------------------------------------------------------------------------------------------------------------------------------------------------------------------------------------------------------------------------------------------------------------------------------------------------------------------------------------------------------------------------------------------------------------------------------------------------------------------------------------------------------------------------|
| "Postoperative Period"[mh] OR Anesthesia[mh] "surgical procedures, operative"[mh] OR "perioperative period"[mh] OR "Postoperative period"[tiab] OR "post anaesthes*" [tiab] OR "post anesthes*" [tiab] OR postoperative[tiab] OR "post operative"[tiab] OR "Anesthesia recovery period"[tiab] OR "Anaesthesia recovery period"[tiab] OR anesthesia[tiab] OR anaesthesia[tiab] "surgical procedures"[tiab] OR surger*[tiab] OR operation*[tiab] OR operative[tiab] "perioperative period"[tiab] | "adult"[mh] OR adult*[tiab] OR elderly[tiab] OR "young adult*" [tiab] OR "young people"[tiab] OR "aged person"[tiab] OR "aged people"[tiab] OR senior*[tiab] OR frail[tiab] | OR "recovery room"[mh] OR PACU[tiab] OR "recovery room"[tiab] OR "advanced recovery room"[tiab] OR "extended recovery room"[tiab] OR anaesthesia care unit*[tiab] OR anesthesia care unit*[tiab] OR "postanaesthesia care unit*[tiab] OR "postanesthesia care unit*[tiab] OR "post operative recovery unit*[tiab] | "Patient outcome assessment"[mh] OR "treatment outcome"[mh] OR mortality[mh] OR "length of stay"[mh] OR "postoperative complications"[mh] OR reoperation*[mh] OR "Patient outcome assessment"[tiab] OR "patient outcome*" [tiab] OR or outcome*[tiab] OR "treatment outcome"[tiab] OR mortality[tiab] OR "fatal outcome*" [tiab] OR morbidity[tiab] OR "length of stay"[tiab] OR "postoperative complications"[tiab] OR "return to theatre"[tiab] OR complication*[tiab] OR "intensive care"[tiab] OR "intensive care admission"[tiab] OR "health outcome"[tiab] OR "adverse event*" [tiab] |
